# A Habenula Neural Biomarker Simultaneously Tracks Weekly and Daily Symptom Variations during Deep Brain Stimulation Therapy for Depression

Shi Liu<sup>1,2,3,9</sup>, Yu Qi<sup>1,3</sup>, Shaohua Hu<sup>4</sup>, Ning Wei<sup>4</sup>, Jianmin Zhang<sup>5</sup>, Junming Zhu<sup>5</sup>, Hemmings Wu<sup>5</sup>, Hailan Hu<sup>6</sup>, Yuxiao Yang<sup>1,2,3,5,7\*</sup> and Yueming Wang<sup>1,3,8\*</sup>

<sup>1</sup> MOE Frontier Science Center for Brain Science and Brain-machine Integration, Nanhu Brain-computer Interface Institute, Hangzhou, 310058, China.

<sup>2</sup> State Key Laboratory of Brain-machine Intelligence, Hangzhou, 311100, China.

<sup>3</sup> College of Computer Science and Technology, Zhejiang University, Hangzhou, 310058, China.

<sup>4</sup> Department of Psychiatry, The First Affiliated Hospital, Zhejiang University School of Medicine, Hangzhou, 310003, China.

<sup>5</sup> Department of Neurosurgery, The Second Affiliated Hospital of Zhejiang University, Hangzhou, 310058, China.

<sup>6</sup> School of Brain Science and Brain Medicine, Zhejiang University, Hangzhou, 310058, China.

<sup>7</sup> NHC and CAMS Key Laboratory of Medical Neurobiology, Zhejiang University, Hangzhou, 310058, China.

<sup>8</sup> Qiushi Academy for Advanced Studies, Zhejiang University, Hangzhou, 310058, China.

<sup>9</sup> Lingang Laboratory, Shanghai, 200031, China.

\* Corresponding author(s). E-mail(s): [yuxiao.yang@zju.edu.cn](mailto:yuxiao.yang@zju.edu.cn); [yumingwang@zju.edu.cn](mailto:yumingwang@zju.edu.cn)

**Running title:** A Habenula Biomarker for Depression DBS Therapy

**Keywords:** deep brain stimulation; treatment-resistant depression; habenula; local field potential; neural biomarker; machine learning

## Abstract

31  
32 Deep brain stimulation (DBS) targeting the lateral habenula (LHb) is a promising  
33 therapy for treatment-resistant depression (TRD) but its clinical effect has been  
34 variable, which can be improved by adaptive DBS (aDBS) guided by a neural  
35 biomarker of depression symptoms. A clinically-viable neural biomarker is desired to  
36 classify depression symptom states, track both slow and fast symptom variations  
37 during the treatment, and respond to DBS parameter alterations, which is currently  
38 lacking. Here, we conducted a study on one TRD patient who achieved remission  
39 following a 41-week LHb DBS treatment, during which we assessed slow symptom  
40 variations using weekly clinical ratings and fast variations using daily self-reports.  
41 We recorded daily LHb local field potentials (LFP) concurrently with the reports  
42 during the entire treatment process. We then used machine learning methods to  
43 identify a personalized depression neural biomarker from spectral and temporal LFP  
44 features. The identified neural biomarker classified high and low depression symptom  
45 severity states with a cross-validated accuracy of 0.97. It further simultaneously  
46 tracked both weekly (slow) and daily (fast) depression symptom variation dynamics,  
47 achieving test data explained variance of 0.74 and 0.63, respectively. It finally  
48 responded to DBS frequency alterations. Our results hold promise to identify  
49 clinically-viable neural biomarkers to facilitate future aDBS for treating TRD.

## 50 51 **1. Introduction**

52 Major depressive disorder (MDD) is one of the most common neuropsychiatric  
53 disorders, affecting over 300 million individuals worldwide [1] . Approximately 30%

54 of MDD patients are treatment-resistant, meaning they do not respond adequately to  
55 at least two antidepressant trials [2]. Deep brain stimulation (DBS) is a neurosurgical  
56 procedure that allows targeted circuit-based neuromodulation [3]. It has emerged as a  
57 promising treatment option for patients with treatment-resistant depression (TRD) [4–  
58 6], as shown by open-label studies targeting various brain structures involved in the  
59 brain’s “reward” system that mediates positive motivations. Such targets include the  
60 subcallosal cingulate cortex (SCC) [7], the ventral capsule/ventral striatum (VC/VS)  
61 [8], the medial forebrain bundle (MFB) [9], and the bed nucleus of the stria terminalis  
62 (BNST) [10]. However, several recent double-blinded clinical trials have shown that  
63 the effects of DBS targeting these brain structures are inconsistent across patients  
64 [11–15]. As a potential improvement over DBS, adaptive DBS (aDBS) optimizes  
65 DBS parameters in real-time by using neural signals as feedback for enhancing  
66 clinical efficacy [16]. A recent study implements aDBS targeting VC/VS in a TRD  
67 patient by triggering stimulation only when the local field potential (LFP) signal  
68 pattern indicates worsening of depression symptoms, achieving rapid alleviation of  
69 depression symptoms [17].

70 The lateral habenula (LHb) is a hub structure that plays a central role in the brain’s  
71 “anti-reward” system that mediates negative motivations [18–20]. Animal studies  
72 have systematically shown that the local bursting firing patterns in LHb are closely  
73 related to depression-like behaviors and that neuromodulation of LHb has significant  
74 antidepressant effects [21,22]. Several clinical studies have reported single-patient  
75 depression symptom alleviation following LHb DBS since 2010 [23–26]. On the  
76 other hand, two recent clinical studies on seven or six patients has shown more  
77 variable effects of LHb DBS across patients [27,28] Similar to other DBS targets,

78 aDBS for LHb also provides a promising path towards improved and more consistent  
79 treatment effects across TRD patients.

80 A critical and fundamental requirement for developing LHb aDBS is the  
81 identification of an LHb neural biomarker of depression symptoms during the DBS  
82 treatment to provide the necessary feedback signal [29,30]. A population-level SCC  
83 LFP spectral power biomarker has been identified for tracking depression symptom  
84 recovery with SCC DBS in five TRD patients [31]. Personalized amygdala and BNST  
85 LFP gamma power biomarkers have been identified for optimizing VC/VS DBS [32].  
86 For LHb DBS, LFP signals have been recorded before the DBS treatment starts but  
87 not during the multi-month-long treatment process [27,28,33] and several studies  
88 have found statistical correlations between pre-treatment LHb LFP spectral features  
89 and after-treatment depression symptom ratings [27,28,33]. However, it is unknown  
90 whether the identified LFP features can classify depression symptom severity states  
91 or track the temporal dynamics of depression symptom variations during the DBS  
92 treatment process. Therefore, a useful neural biomarker for realizing LHb aDBS is  
93 still lacking.

94 A clinically-viable neural biomarker is desired to be able to track both the slow  
95 and fast temporal dynamics of depression symptom variations during DBS. This is  
96 because both natural and DBS-induced depression symptom changes can vary at  
97 different time scales, with both slow-changing dynamics over months or weeks [34–  
98 38] and fast-changing dynamics over hours or days [9,39–42]. Existing neural  
99 biomarker studies have focused on tracking the temporal dynamics of either slow or  
100 fast symptom variations. The aforementioned SCC neural biomarker for SCC DBS  
101 tracks the temporal dynamics of the weekly symptom variations over 24 weeks [31].

102 The aforementioned amygdala and BNST neural biomarkers for VC/VS DBS track  
103 the faster temporal dynamics of symptom variations within several days [17,32].  
104 Several other studies have also identified resting-state (without DBS) neural  
105 biomarkers of relatively fast depression symptom variations within several days using  
106 multisite intracranial electroencephalography (iEEG) [43–45]. However, to date,  
107 identifying a neural biomarker that can simultaneously track the temporal dynamics  
108 of both slow and fast depression symptom variations, in particular during LHb DBS  
109 treatment, remains elusive.

110 Moreover, the neural biomarker needs to reflect the dose effect of different DBS  
111 parameters for optimizing stimulation parameters in aDBS. Since the DBS  
112 mechanism for treating TRD is largely unknown [46], only few studies have  
113 experimentally explored the dose effect of different DBS amplitudes on human neural  
114 signals [17,31,32]. On the other hand, DBS frequency also has been shown to play a  
115 key role in altering TRD symptoms [4–6,47]. However, how different LHb DBS  
116 parameters, especially stimulation frequencies, alter neural signals or neural  
117 biomarkers in TRD patients remains unknown.

118 Here, to close the above gaps, we conducted LHb DBS on one TRD patient where  
119 we evaluated the patient’s symptoms and concurrently collected daily LHb LFP  
120 signals during the entire 41-week long treatment process (Figure 1A). With this  
121 unique dataset and by using machine learning techniques, we identified a clinically-  
122 viable neural biomarker from spectral and temporal LHb features that (1) accurately  
123 classified high and low depression symptom severity states; (2) significantly tracked  
124 the temporal dynamics of weekly (slower) and daily (faster) depression symptom  
125 variations during the DBS treatment; (3) reflected the depression symptom changes

126 in response to DBS frequency alterations. Together, our results have implications for  
127 identifying clinically-viable neural biomarkers to facilitate future LHB aDBS  
128 developments for treating TRD.

## 129 **2. Materials and Methods**

### 130 **2.1 Participant**

131 This study included a male TRD patient aged 36-40 years old (see Note S1 for detailed  
132 patient medical information) participating in a clinical trial of LHB DBS treatment  
133 starting in October 2021. The patient provided informed consent for participation in  
134 the clinical trial. This study received approval from the Ethics Committee of Zhejiang  
135 University School of Medicine Second Affiliated Hospital (protocol number  
136 20210218). It was registered at [www.clinicaltrials.gov](http://www.clinicaltrials.gov) (NCT05716555), where  
137 detailed information regarding the inclusion and exclusion criteria can be accessed.

138 At the beginning of the clinical trial, two independent psychiatrists evaluated the  
139 patient's psychotic symptoms using the 17-item Hamilton Depression Rating Scale  
140 (HAMD), the Montgomery Asberg Depression Scale (MADRS), and the Hamilton  
141 Anxiety Rating Scale (HAMA) as baseline assessments. In addition to the psychiatric  
142 assessments, the patient underwent a comprehensive physical examination, various  
143 mental scale assessments, and a magnetic resonance imaging (MRI) examination. We  
144 carefully ensured that other psychiatric diagnoses outlined in the Diagnostic and  
145 Statistical Manual of Mental Disorders-Fifth Edition (DSM-5) were excluded.

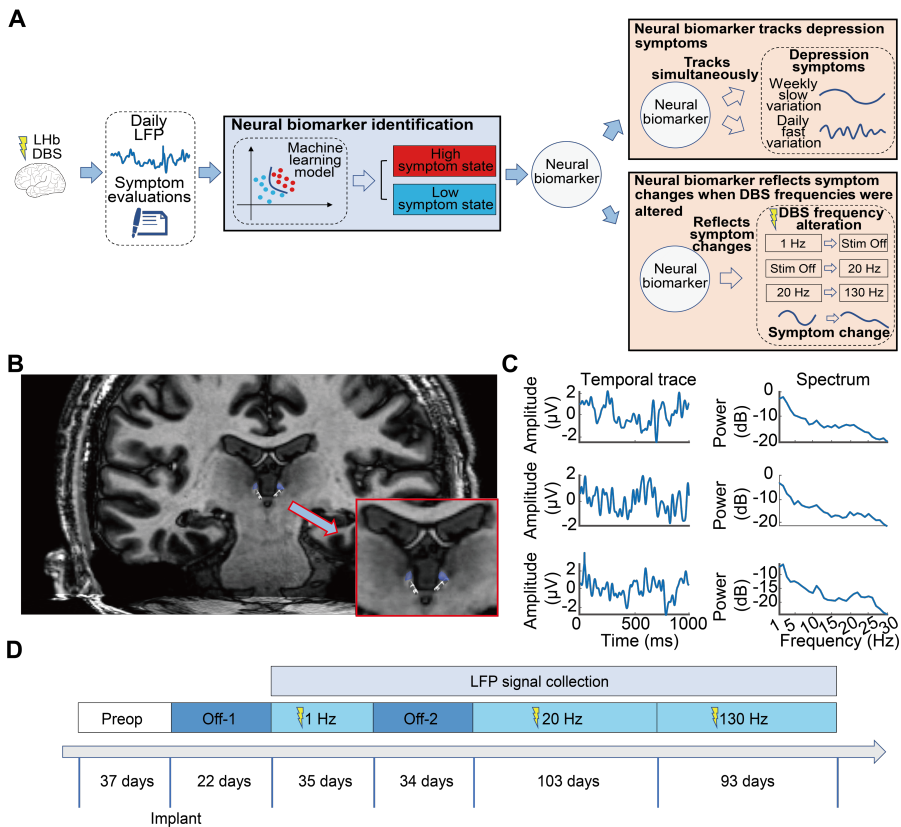

146

147 **Figure 1.** Study framework and experiment design. (A) During the Lhb DBS treatment of one  
 148 TRD patient, we used weekly clinical ratings and daily self-reports to evaluate the symptom  
 149 variations, where we simultaneously collected daily LFP signals from Lhb. Using machine  
 150 learning models, we identified a neural biomarker that classified high and low depression  
 151 symptom states during the DBS treatment. Using data not used in neural biomarker  
 152 identification, we evaluated the neural biomarker in terms of 1) simultaneously tracking the  
 153 temporal dynamics of weekly slow and daily fast variations of depression symptoms; 2)  
 154 reflecting symptom changes when DBS frequencies were altered. (B) MRI visualization  
 155 showing the DBS lead placement within the patient's Lhb. The shaded blue area indicates the  
 156 volume of tissue activated (VTA) by the DBS. (C) Temporal dynamics and spectrum of  
 157 example epochs of LFP signals after preprocessing. (D) Lhb DBS Treatment Timeline. The  
 158 entire treatment process consisted of six stages. LFP signal collection began after the  
 159 activation of 1 Hz stimulation.

## 160 2.2 Surgical procedure

161 A standard DBS implantation procedure was employed. Bilateral quadripolar  
 162 electrodes (1200-40, SceneRay, Suzhou, China) were surgically implanted in the Lhb

163 under local anesthesia (Figure 1B). The DBS electrodes had a diameter of 1.27 mm  
164 and a lead length of 400 mm. Each electrode's four contacts measured 1.5 mm in  
165 length with a spacing of 0.5 mm. The LHb targeting was guided by preoperative MRI  
166 sequences. After confirming the absence of stimulation side effects through  
167 intraoperative testing, an implantable pulse generator (SR1101, SceneRay) was  
168 placed under general anesthesia. The DBS device was also capable of recording and  
169 wireless transmitting LFP signals (Figure 1C).

### 170 **2.3 DBS treatment process and symptom evaluations**

171 During the bilateral DBS treatment process, we made multiple adjustments to the  
172 stimulation parameters to achieve the best therapeutic effect. We divided the treatment  
173 process into six stages based on the alterations of stimulation parameters (Figure 1D):  
174 1) the "Preop" stage, the time before the DBS electrode implantation; 2) the "Off-1"  
175 stage, patient recovery with DBS turned off; 3) the "1 Hz" stage, activation of 1 Hz  
176 stimulation; 4) the "Off-2" stage, DBS turned off because of unnoticed power off; 5)  
177 the "20 Hz" stage, re-activation of 20 Hz stimulation; 6) the "130 Hz" stage,  
178 activation of 130 Hz stimulation. More details can be found in Note S2. The entire  
179 duration of DBS treatment spanned 41 weeks (starting from DBS electrode  
180 implantation).

181 The efficacy of DBS treatment was evaluated from two perspectives: clinician  
182 evaluation and self evaluation. For clinician evaluation, a psychologist blinded to the  
183 current stimulation parameters and their adjustments evaluated the patient's  
184 depression and anxiety symptoms on a weekly basis using standardized rating scales  
185 (HAM-D, MADRS, HAMA). Response is defined as a 50% or greater improvement



186 on the HAMD score from the pre-treatment baseline. Remission is defined as  
187 achieving a HAMD score of 7 or less. The psychologist also evaluated the patient's  
188 emotional blunting and cognitive functioning during the treatment (see Note S3). For  
189 self evaluation, the patient used the Visual Analogue Scale (VAS) for depression  
190 (VAS-D) and anxiety (VAS-A) to self-report the symptom severity. Self-reported  
191 VASA and VAS-D had been used to assess the rapid effects of antidepressants [48].  
192 To facilitate daily data collection, we established an online questionnaire system  
193 where the patient could conveniently complete the self-reports via the smartphone or  
194 computer.

## 195 **2.4 LFP signal recording, signal processing, and feature** 196 **extraction**

197 After activating the 1 Hz stimulation, we collected daily LFP signals (30 minutes per  
198 day) concurrent with daily self-reported VAS-D and VAS-A (details in section 2.3).  
199 LFP signals were recorded at a sampling rate of 1000 Hz. Notably, stimulation was  
200 deactivated during the signal acquisition process. We reconstructed the electrode  
201 positions using MRI and selected two contacts in the left hemisphere for bipolar  
202 recording of a single LFP channel. The patient was instructed to attempt daily LFP  
203 recording and VAS-D/VAS-A reporting. Throughout the entire 41-week (287-day)  
204 treatment, the patient was able to activate LFP recording and report VAS-D and VAS-  
205 A on 122 days distributed across 26 weeks. Therefore, the subsequent analyses  
206 focused on the LFP signals, VAS-D, and VAS-A scores recorded from these 122 days,  
207 and the HAMD, MADRS, and HAMA scores recorded for the 26 weeks.

208 Custom MATLAB scripts (MathWorks Inc., Natick, MA, USA) were used to  
209 preprocess the LFP signals. The LFP signals were first band-pass filtered from 1 to  
210 30 Hz using a Butterworth filter of order 12 to avoid the noise observed in higher  
211 frequency bands. Then, we divided the daily 30-minute LFP signals into 10-second  
212 epochs with a 50% overlap. Next, we used a standard procedure (details in Note S4)  
213 to remove bad epochs from daily LFP signals (example temporal traces and spectrum  
214 of preprocessed LFP epochs were shown in Figure 1C).

215 For each remaining LFP epoch, we computed its spectral domain (SD) and  
216 temporal domain (TD) features. SD features included PSD of the four bands ( $\delta$  (1-4  
217 Hz),  $\theta$  (4-8 Hz),  $\alpha$  (8-12 Hz), and  $\beta$  (12-30 Hz)) and phase-amplitude coupling (PAC)  
218 for six specific pairs of coupling. TD features included fourteen temporal domain  
219 features used in previous study [49], e.g., Hjorth mobility, singular value  
220 decomposition (SVD) Fisher information, Hurst exponent, etc. These features capture  
221 the temporal properties of LFP from probabilistic distribution and information theory  
222 perspectives and have been widely used in brain signal analyses [50,51]. As a result,  
223 we obtained 24 features, comprising 10 SD features and 14 TD features for each LFP  
224 epoch. Details of these 24 features are included in Table S1 and Note S4. Finally, we  
225 averaged each feature across LFP epochs within the same day and obtained a single  
226 averaged 24-dimensional LFP feature vector. Our subsequent analyses were based on  
227 the daily LFP features as computed above.

## 228 **2.5 Identification of neural biomarker**

229 We first conducted Spearman's rank correlation analyses between LFP features and  
230 symptoms. For each day, we correlated each daily LFP feature with the daily VAS-D

231 and VAS-A self-reports. For each week, we computed the average of LFP features  
232 across the days that belonged to this week, resulting in weekly LFP features; we then  
233 correlated each weekly LFP feature with the weekly clinical evaluation scales HAMD,  
234 HAMA, and MADRS. Bonferroni correction was used to adjust for multiple  
235 comparisons.

236 Next, we used a data-driven method to identify an LHb neural biomarker of  
237 depression symptoms, where we built a machine learning model to use LFP features  
238 to classify high and low depression symptom states.

239 First, we defined the high and low depression symptom states of the patient by k-  
240 means clustering the weekly depression scales HAMD and MADRS similar to prior  
241 work [17]. Among the total 26 weeks (122 days) of LFP data, 7 weeks (29 days) of  
242 LFP data belonged to the low depression symptom state (labeled 0), 4 weeks (22 days)  
243 of LFP data belonged to the high depression symptom state (labeled 1). The remaining  
244 15 weeks (71 days) were unlabeled and used as test data for subsequent biomarker  
245 tracking evaluation (see next section).

246 Second, based on the labeled data, we built a machine learning model to use the  
247 LFP features to classify high and low depression symptom states. We constructed six  
248 machine learning models: logistic regression (LR), multilayer perceptron (MLP),  
249 adaptive boosting (AdaBoost), support vector machine (SVM), random forest (RF),  
250 and linear discriminant analysis (LDA). We trained and tested these models using 5-  
251 fold cross-validations that were repeated 200 times, where we computed the averaged  
252 cross-validated classification accuracy, specificity, sensitivity, F1 score, and Receiver  
253 Operating Characteristic (ROC) Area Under the Curve (AUC) score as the

254 performance metrics. The model with the highest accuracy was selected for further  
255 analysis.

256 Third, the chosen model was retrained with all labeled data, leading to a “neural  
257 biomarker model”. This model takes the LFP feature as input and outputs the decision  
258 variable as the neural biomarker value (e.g., in the LR model, the decision variable  
259 was computed from the decision probability via the inverse sigmoid function). This  
260 allows us to compute a neural biomarker value for any given LFP feature. Higher  
261 neural biomarker values indicate more severe depression symptoms.

262 In essence, our identified neural biomarker aggregates spectral and temporal  
263 domain features from the LHb LFP signal to classify high and low depression states  
264 during DBS treatment.

## 265 **2.6 Evaluation of the neural biomarker**

266 We evaluated the identified neural biomarker in terms of (1) tracking the temporal  
267 dynamics of weekly symptom variations; (2) tracking the temporal dynamics of daily  
268 symptom variations; (3) reflecting changes in symptom variations induced by DBS  
269 frequency alterations.

270 First, we investigated tracking the temporal dynamics of weekly depression and  
271 anxiety symptom scales that were not used in neural biomarker identification. We  
272 took the daily LFP features as inputs to the neural biomarker model and computed the  
273 output daily neural biomarkers. We then averaged the daily neural biomarkers  
274 belonging to the same week to compute the weekly neural biomarkers. We next  
275 correlated the weekly neural biomarker values with the weekly HAMD, MADRS, and  
276 HAMA scores, respectively, using Spearman’s rank correlation analysis with

277 explained variance (EV) as an estimation. We further analyzed the temporal dynamics  
278 in the neural biomarker and symptoms, using the dynamic time warping (DTW)  
279 distance [52] to measure the temporal tracking ability of the neural biomarker. Both  
280 the neural biomarker values and the symptom scales were normalized to a range of 0  
281 to 1. We used a size three Sakoe–Chiba warping window in the DTW analysis  
282 following prior work [17,53]. A smaller DTW distance represents better temporal  
283 tracking. To determine the significance of the computed DTW distance, we randomly  
284 shuffled the temporal sequence of the neural biomarker 10,000 times and used the  
285 corresponding shuffled DTW distances as the null hypothesis distribution for  
286 computing the *P* value.

287       Second, we investigated tracking the temporal dynamics of the daily VAS-D and  
288 VAS-A self-reports, which were also not used in neural biomarker identification.  
289 Similar to the weekly case, daily LFP features were used to generate daily neural  
290 biomarkers, which were then correlated with daily VAS-D and VAS-A reports. DTW  
291 was again used to assess the temporal tracking of daily depression symptom variations.

292       Third, we qualitatively compared trends in weekly neural biomarkers and  
293 depression ratings across three DBS frequency alterations (1 Hz to Off-2, Off-2 to 20  
294 Hz, 20 Hz to 130 Hz). We used the two-sided Wilcoxon rank-sum test to check whether  
295 there was a significant difference between the two stages before and after alteration.  
296 We also averaged the neural biomarker values and depression ratings across five time  
297 periods for each case: 1) from the beginning of this stage to two weeks before the  
298 alteration week; 2) during the week before the alteration week; 3) during the alteration  
299 week; 4) during one week after the alteration week; 5) averaged from two weeks after  
300 the alteration week to the end of this stage.

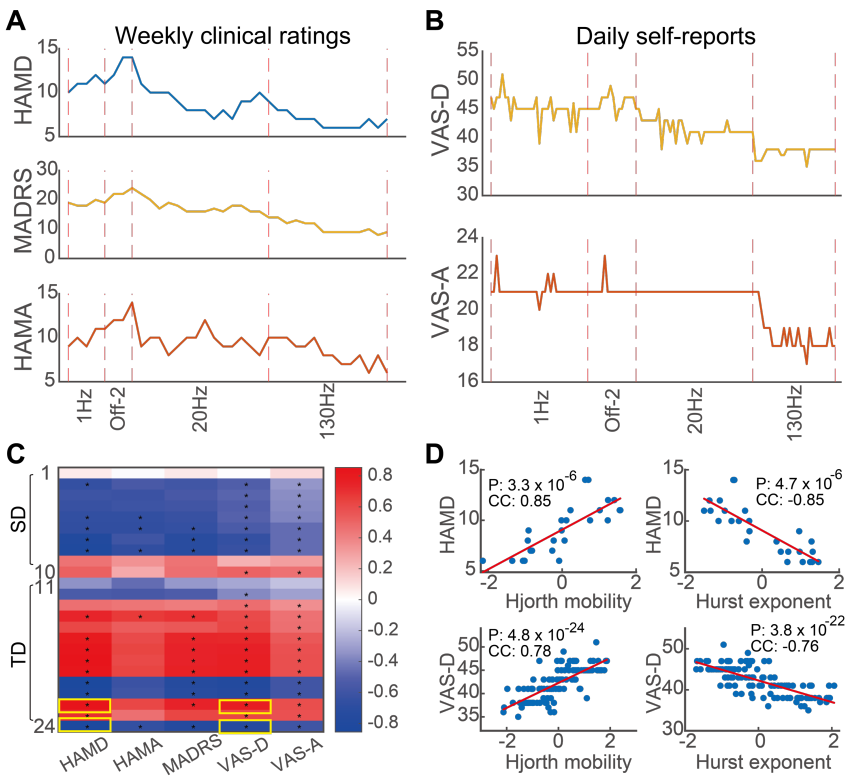

301  
 302 **Figure 2.** Changes of weekly and daily symptom scores during the Lhb DBS treatment and  
 303 their correlations with LFP temporal and spectral domain features. (A) Changes of weekly  
 304 clinical ratings during the treatment. The vertical dashed lines represent different treatment  
 305 stages indicated by the x-axis labels. (B) Changes of daily self-reports during the treatment.  
 306 The vertical dashed lines represent different treatment stages indicated by the x-axis labels. (C)  
 307 Heatmap of the correlation coefficients. Each cell shows the correlation coefficient (CC)  
 308 value between one LFP feature (y-axis) and one symptom score (x-axis), and cells marked with \*  
 309 indicate the coefficients that are significantly different from zero (Bonferroni corrected  $p < 0.05$ ).  
 310 (D) Positive and negative correlation examples with the weekly HAM-D score and daily VAS-  
 311 D score as shown by the yellow boxes in (C).

### 312 3. Results

#### 313 3.1 Lhb DBS improved the patient's clinical symptoms, which 314 were significantly correlated with Lhb LFP features

315 We first examined the TRD patient's symptom changes throughout the Lhb DBS  
 316 treatment process. At the beginning of treatment, the patient's baseline HAM-D score

317 was 20, MADRS score was 25, and HAMA score was 16. In terms of the weekly  
318 clinical ratings (Figure 2A), the patient responded at week 14 (HAMD score dropped  
319 to 10; MADRS score dropped to 19; HAMA score dropped to 8) and achieved  
320 remission by the end of the 41-week treatment (HAMD score was 7; MADRS score  
321 was 9; HAMA score was 6). The daily self-reports followed a similar decreasing trend  
322 (Figure 2B). Such a consistent trend was confirmed by the strong positive correlation  
323 between the daily self-reports and weekly clinical ratings (Spearman's  $\rho > 0.5$ ,  $P <$   
324  $0.05$  for all pair-wise correlations; see Table S2 and Figure S1 for details). Besides  
325 alleviating the symptoms based on the weekly clinical ratings and daily self-reports,  
326 we also found improvement in emotional blunting and cognitive functioning (Note  
327 S3 and Tables S3-S5).

328         During the LHb DBS treatment process, we recorded daily LHb LFP signals.  
329 Therefore, we investigated how the LFP features correlated with the patient's  
330 symptom changes. We found that many of the temporal and spectral domain LHb LFP  
331 features were significantly correlated with the weekly clinical ratings and daily self-  
332 reports (Figure 2C). For example, Hurst exponent exhibited the strong correlations  
333 with both weekly HAMD scores (Figure 2D, Spearman's  $\rho = -0.85$ , Bonferroni  
334 corrected  $P = 4.7 \times 10^{-6}$ ) and daily VAS-D scores (Figure 2D, Spearman's  $\rho =$   
335  $-0.76$ , Bonferroni corrected  $P = 3.8 \times 10^{-22}$ ). These results show that LHb LFP  
336 temporal and spectral domain features were strongly correlated with weekly and daily  
337 depression symptom scores, indicating that it is feasible to identify an LHb neural  
338 biomarker of depression symptoms from the LFP temporal and spectral domain  
339 features.

340 **3.2 Accurate classification of high and low depression symptom**  
341 **severity states led to the identification of an LHb neural**  
342 **biomarker**

343 We next used the LFP temporal and spectral features to identify a neural biomarker  
344 that can classify high and low depression symptom severity states. We started by  
345 defining a state of high symptom severity and a state of low symptom severity via  
346 clustering the weekly depression scales HAMD and MADRS (Figure 3A). The high  
347 symptom state (7 weeks) had an average HAMD score of 12.8 and an average  
348 MADRS score of 22.5, while the low symptom state (4 weeks) had an average HAMD  
349 score of 6.3 and an average MADRS score of 9.0. We then used LFP temporal domain  
350 and spectral domain features from these 11 weeks to classify the high and low  
351 symptom severity states via six machine learning models in cross-validation. Among  
352 these six models, the LR model performed better than other more complicated models  
353 (Figure 3B and table S6). Specifically, for the LR model, the cross-validated  
354 classification accuracy was  $0.973 \pm 0.002$  (Mean  $\pm$  SEM), the specificity was  
355  $0.961 \pm 0.003$ , the sensitivity was  $0.988 \pm 0.002$ , the F1-score was  $0.970 \pm 0.002$ ,  
356 and the AUC score was  $0.974 \pm 0.001$ , which were all significantly higher than  
357 other models (Wilcoxon rank sum test, Bonferroni corrected  $P < 0.05$  for all  
358 comparisons), suggesting that the LR model was best suited for classifying the  
359 collected data. We thus selected the LR model for further analysis. Then, we retrained  
360 the LR model using all labeled data, resulting in the neural biomarker model. The  
361 neural biomarker model takes the LFP features as input and outputs the model



362 decision value as the identified neural biomarker, with higher values indicating worse  
 363 depression symptoms.

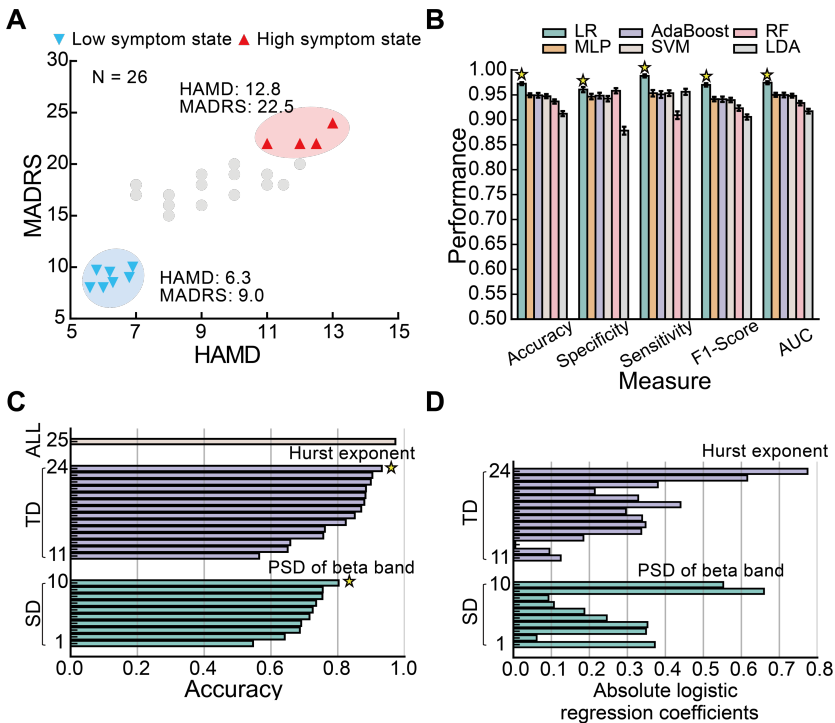

364  
 365 **Figure 3.** Accurate classification of high and low depression symptom severity states by the  
 366 identified neural biomarker. (A) Clustering of depression symptom severity states. We clustered  
 367 the HAMD and MADRS scores to obtain two distinct symptom states: a high depression  
 368 symptom severity state (shaded in red) and a low depression symptom severity state (shaded in  
 369 blue). Each point represents data of a week. The average HAMD and MADRS scores of the  
 370 two clusters are also indicated in the figure. (B) Classification performance of different  
 371 classifiers. The bar represents mean and the whiskers represent the 95% confidence interval.  
 372 Six classification models (different colors) were compared in terms of five performance  
 373 matrices (different x-axis groups): accuracy, specificity, sensitivity, F1-Score and AUC. The  
 374 best model was indicated by a yellow star for each metric. Classification model names and  
 375 abbreviations: logistic regression (LR), multilayer perceptron (MLP), adaptive boosting  
 376 (AdaBoost), support vector machine (SVM), random forest (RF), and linear discriminant  
 377 analysis (LDA). (C) Classification accuracy of individual features and all LFP features by the  
 378 logistic regression model. The individual SD features are in green, and their indices are ordered  
 379 based on classification accuracy. The individual TD features are in blue, and their indices are  
 380 ordered by classification accuracy. The combination of all LFP features is in brown. The best  
 381 individual feature was indicated by a yellow star for each domain. (D) The absolute coefficients  
 382 of each feature in the logistic regression model trained with all LFP features. The individual  
 383 feature indices are the same as in (C).

384 We further investigated how different features contributed to identifying the  
385 neural biomarker by performing separate classifications for each feature (Figure 3C).  
386 The best temporal domain feature was the Hurst exponent, with a cross-validated  
387 classification accuracy of 0.932. While the best spectral domain feature was the PSD  
388 of the  $\beta$  band, with an average accuracy of 0.803. Overall, temporal domain features  
389 (average accuracy: 0.781) outperformed spectral domain features (average accuracy:  
390 0.705). Notably, combining all the LFP features yielded superior performance  
391 compared to individual features. Consistently, by investigating the logistic regression  
392 coefficients of the neural biomarker model (Figure 3D), we found that the features  
393 with better classification accuracy also had larger coefficients in the neural biomarker  
394 model. These results show that the temporal domain and spectral domain features had  
395 supplementary information that both contributed to the identification of the neural  
396 biomarker, with temporal features having a stronger influence.

### 397 **3.3 The identified neural biomarker simultaneously tracked the** 398 **temporal dynamics of weekly and daily depression symptom** 399 **variations during LHb DBS treatment**

400 After identifying the neural biomarker of depression symptoms, we evaluated its  
401 ability to track the temporal dynamics of slow (weekly) and fast (daily) depression  
402 symptom variations during the LHb DBS treatment. For slow weekly variations, we  
403 used the identified neural biomarker model to compute weekly neural biomarker  
404 values (see Methods section 2.6 for details). We used the weekly neural biomarker  
405 values to predict the associated weekly clinical ratings, where we strictly excluded  
406 the weekly data that were used to identify the neural biomarker (i.e., the prediction

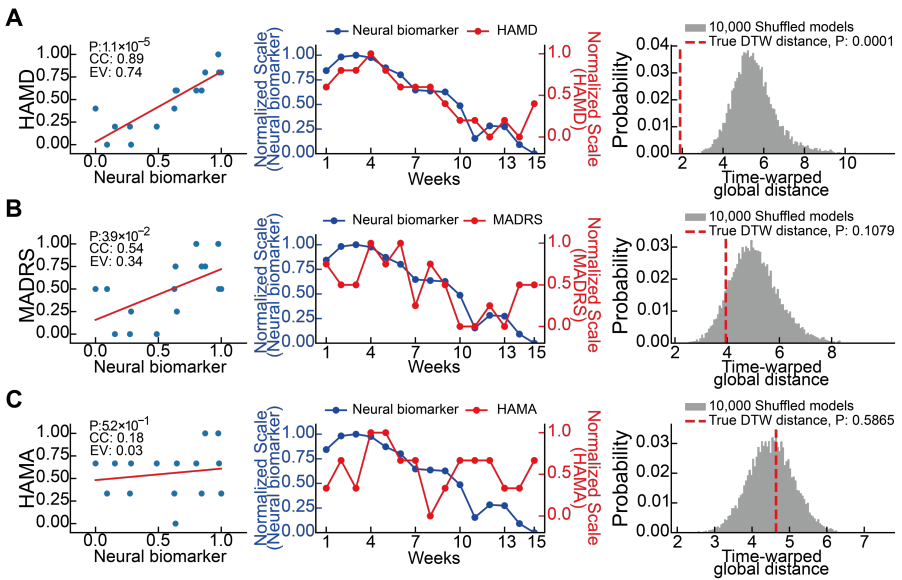

407

408 **Figure 4.** Accurate tracking the temporal dynamics of weekly depression symptom variations  
 409 by the identified neural biomarker. (A) Left: correlation between the identified neural  
 410 biomarker values and the weekly HAMD scores unseen in neural biomarker identification. EV:  
 411 Explained variance. Middle: neural biomarker tracking of the weekly HAMD score dynamics  
 412 over time. Right: the DTW distance analysis result for evaluating the significance of tracking  
 413 in the middle panel. Smaller DTW distance represents better tracking. Note that we normalized  
 414 both the neural biomarker values and the symptom scales to a range of 0 to 1 using min-max  
 415 normalization for better visualization. (B) same as (A) but for the weekly MADRS scores. (C)  
 416 same as (A) but for the weekly HAMA scores.

417 was based on new unseen data not used in training the neural biomarker model). We  
 418 found that the weekly neural biomarker values significantly predicted the HAMD  
 419 scores (Figure 4A,  $EV=0.74$ ,  $P = 1.1 \times 10^{-5}$ ). Further, considering the temporal  
 420 dynamics in detail by using the DTW distance analysis (see Methods section 2.6), we  
 421 found that the weekly neural biomarker significantly tracked the temporal dynamics  
 422 of weekly HAMD score variations (random shuffle  $P = 0.00001$ ). Consistently, the  
 423 weekly neural biomarker values significantly predicted the MADRS scores (Figure  
 424 4B,  $EV=0.34$ ,  $P = 0.039$ ), and tracked the temporal dynamics in the DTW distance  
 425 analysis with marginally significant statistics (random shuffle  $P = 0.1079$ ). Converse-

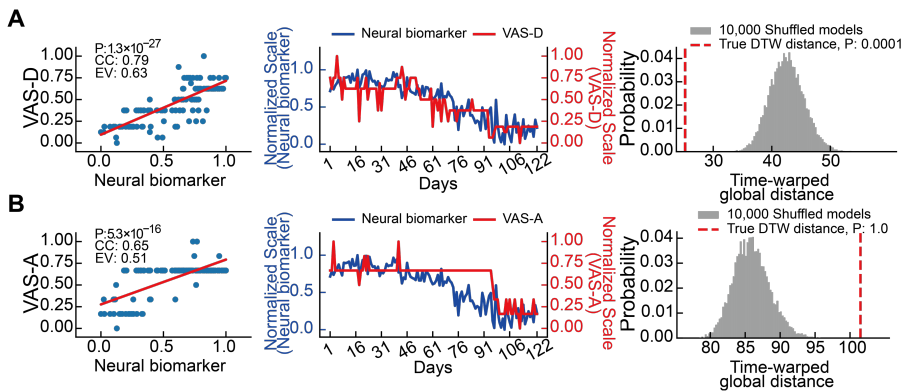

426  
427 **Figure 5.** Accurate tracking the temporal dynamics of daily depression symptom variations by  
428 the identified neural biomarker. (A) Left: correlation between the identified neural biomarker  
429 values and the daily VAS-D scores unseen in neural biomarker identification. EV: Explained  
430 variance. Middle: neural biomarker tracking of the daily VAS-D score dynamics over time.  
431 Right: the DTW distance analysis result for evaluating the significance of tracking in the middle  
432 panel. Smaller DTW distance represents better tracking. (B) same as (A) but for the daily VAS-  
433 A scores.

434 ly, the weekly neural biomarker values did not predict the HAMA scores (Figure 4C,  
435  $EV=0.03$ ,  $P = 5.2 \times 10^{-1}$ ) or tracked the temporal dynamics (random shuffle  $P =$   
436  $0.5865$ ).

437 For fast daily variations, we used the identified neural biomarker model to  
438 compute daily neural biomarker values and used the daily neural biomarker values to  
439 predict the associated daily self-reports (again, data not used in training the neural  
440 biomarker model). We found that the daily neural biomarker values significantly  
441 predicted the VAS-D scores (Figure 5A,  $EV=0.63$ ,  $P = 1.3 \times 10^{-27}$ ) and showed  
442 significant tracking of VAS-D dynamics (random shuffle  $P = 0.0001$ ). By contrast,  
443 while the daily neural biomarker values predicted the VAS-A scores (Figure 5B,  
444  $EV=0.51$ ,  $P = 5.3 \times 10^{-16}$ ) but the daily neural biomarker did not track VAS-A  
445 dynamics (random shuffle  $P = 1.00$ ).

446 In summary, the results show that the identified neural biomarker significantly  
447 tracked the temporal dynamics of both weekly and daily variations in depression

448 symptoms during the LHB DBS treatment and specifically tracked depression  
449 symptoms rather than anxiety symptoms.

### 450 **3.4 The identified neural biomarker reflected changes of** 451 **depression symptoms in response to DBS parameter** 452 **alterations**

453 A useful neural biomarker for DBS also needs to reflect the effect of different DBS  
454 parameters. We thus finally evaluated if the identified neural biomarker could reflect  
455 changes in depression symptoms in response to DBS parameter alterations. We  
456 applied three different DBS frequencies during the treatment: 1 Hz, 20 Hz, and 130  
457 Hz. For the DBS alteration from 1 Hz to stimulation off (Off-2, the DBS device shut  
458 down due to unnoticed power off), there was a trend of increasing for the neural  
459 biomarker, HAMD, and MADRS while the statistical tests were not significant due  
460 the limited sample size (Figure 6A, 1Hz v.s. stimulation off, normalized mean $\pm$ s.e.m.,  
461 neural biomarker:  $0.912 \pm 0.055$  v.s.  $0.956 \pm 0.026$ ,  $P=0.35$ ; HAMD:  $0.562 \pm 0.062$   
462 v.s.  $0.688 \pm 0.036$ ,  $P=0.16$ ; MADRS:  $0.656 \pm 0.031$  v.s.  $0.734 \pm 0.053$ ,  $P=0.35$ ),  
463 which indicated a rebound trend of depression symptoms due to the disruption of DBS  
464 treatment. For the DBS alteration from stimulation off (Off-2) to 20 Hz stimulation  
465 (Figure 6B), the neural biomarker, HAMD, and MADRS consistently decreased  
466 (Figure 6B, stimulation off v.s. 20 Hz, neural biomarker:  $0.905 \pm 0.095$  v.s.  $0.545 \pm$   
467  $0.059$ ,  $P=0.04$ ; HAMD:  $0.875 \pm 0.125$  v.s.  $0.375 \pm 0.072$ ,  $P=0.05$ ; MADRS:  $0.875$   
468  $\pm 0.000$  v.s.  $0.606 \pm 0.061$ ,  $P=0.08$ ). Specifically, the neural biomarker, HAMD and  
469 MADRS scores all decreased at the week of DBS frequency alteration, further  
470 decreased one week after the alteration and continued to decrease with more obvious

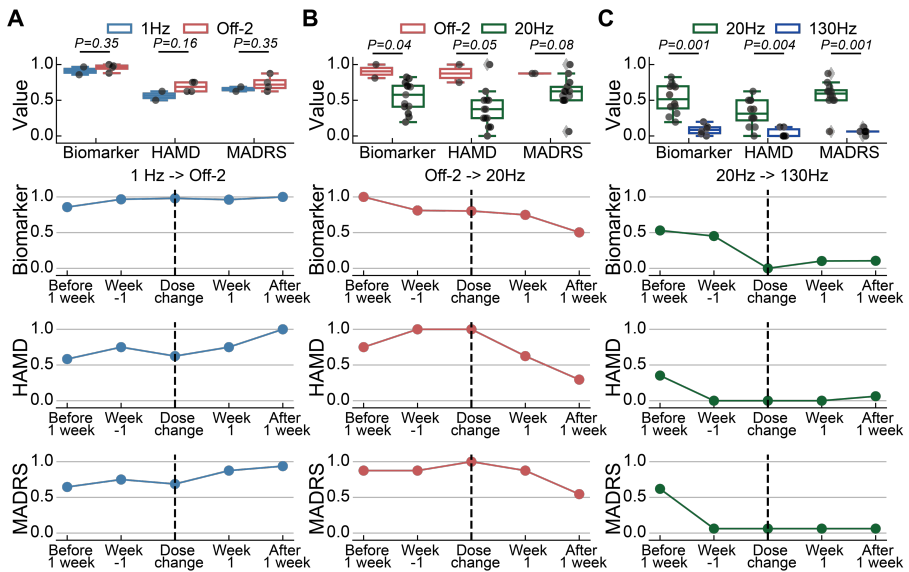

471 **Figure 6.** The consistent trend between the neural biomarker and the depression symptom  
 472 changes when DBS frequencies were altered. (A) DBS frequency was altered from 1 Hz to Off-  
 473 2. Top: comparison of the values of the biomarker, HAMD scores and MADRS scores between the  
 474 1Hz stage and Off-2 stage. Two-sided Wilcoxon rank-sum test was used for significance  
 475 test. Row two: changes in the identified neural biomarker time-locked to the DBS frequency  
 476 alteration week (vertical dashed line). Row three: changes in HAMD time-locked to the DBS  
 477 frequency alteration week. Bottom: changes in MADRS time-locked to the DBS frequency  
 478 alteration week. (B) same as (A) but for DBS frequency alteration from Off-2 to 20 Hz. (C)  
 479 same as (A) but for DBS frequency alteration from 20 Hz to 130 Hz.  
 480

481 changes after week two. For the DBS alteration from 20 Hz to 130 Hz stimulation  
 482 (Figure 6C), the neural biomarker, HAMD, and MADRS also consistently decreased  
 483 (Figure 6C, 20 Hz v.s. 130 Hz, neural biomarker:  $0.524 \pm 0.060$  v.s.  $0.088 \pm 0.029$ ,  
 484  $P=0.001$ ; HAMD:  $0.323 \pm 0.054$  v.s.  $0.042 \pm 0.026$ ,  $P=0.004$ ; MADRS:  $0.573 \pm$   
 485  $0.056$  v.s.  $0.062 \pm 0.016$ ,  $P=0.001$ ). More specifically, the neural biomarker, HAMD  
 486 and MADRS scores already showed a trend of decreasing before the DBS frequency  
 487 alteration, and the alleviated symptoms stayed relatively stable during the alteration  
 488 week, at week one after the alteration, and the same stable trend continued after week  
 489 two. The results suggested that the 1 Hz DBS did not induce an obvious change in  
 490 depression symptoms, while the 20 Hz and 130 Hz DBS had more meaningful effects.

491 The results further demonstrated that the identified neural biomarker indeed reflected  
492 the different change patterns in depression symptoms when the DBS frequencies were  
493 altered.

## 494 **4. Discussion**

### 495 **4.1 A data-driven LHb neural biomarker for tracking slow and** 496 **fast depression symptom variations during DBS treatment**

497 A mechanism-driven neural biomarker for depression is currently lacking mainly  
498 because the neural circuitry underlying depression has not been clearly delineated  
499 [54]. Therefore, current neural biomarkers of depression symptoms for tracking DBS  
500 effects have largely used data-driven machine learning methods to map LFP features  
501 to depression symptom ratings [17,31,32]. The usefulness of data-driven neural  
502 biomarkers critically depends on the data used to identify the neural biomarker. For  
503 example, a recent work [31] focused on a cingulate neural biomarker that was trained  
504 with and accordingly predicted longer-term (on the time scale of weeks) clinical  
505 ratings. On the other hand, another recent work [17] only trained and tested a neural  
506 biomarker with shorter-term (on the time scale of minutes) self-reports. Our work is  
507 unique in that while we identified our LHb neural biomarker based on weekly clinical  
508 ratings, we demonstrated that the neural biomarker predicted not only weekly clinical  
509 ratings (data not used in identification) but also daily self-reports (data again not used  
510 in identification). The results suggested that our LHb neural biomarker could track  
511 the temporal dynamics of both slow and fast depression symptom variations, which  
512 was useful for developing new aDBS strategies that are robust across different time

513 scales. It is worth noting that our LHb neural biomarker specifically tracked the  
514 temporal dynamics of weekly and daily depression symptom scores but not the  
515 anxiety symptom scores. It suggests that despite the overlapping of depression-related  
516 and anxiety-related brain networks [55], LHb neural activity is mainly related to  
517 depression, which is supported by prior animal studies [21,22].

518 Both population-level and personalized neural biomarkers of depression  
519 symptoms have been identified for tracking DBS effects. Population-level neural  
520 biomarkers are derived from data collected from several patients and have the benefits  
521 of being directly applicable to a new patient and robust interpretability of the neural  
522 biomarker's biophysical mechanism across patients [31]. By contrast, personalized  
523 neural biomarkers are derived from data collected from an individual patient, which  
524 is more powerful in capturing the unique characteristics of depression symptoms in  
525 each patient, especially given the large inter-individual variability in depression-  
526 related brain networks [56]. With the emerging capability of recording more data  
527 within a single patient using mobile devices, personalized neural biomarker models  
528 can be more accurate in tracking the temporal dynamics of depression symptom  
529 variations. With such trends, a personalized neural biomarker has been identified and  
530 used for realizing aDBS targeting VC/VS [17]. Our study identified a personalized  
531 neural biomarker that achieved accurate classification and tracking of depression  
532 symptom variations during the DBS treatment targeting LHb, confirming the  
533 usefulness of personalization. Nevertheless, population-level and personalized neural  
534 biomarkers can complement each other. For example, one can leverage a large amount  
535 of population data to train an interpretable population-level neural biomarker model,



536 followed by fine-tuning with personalized data to further improve its accuracy, which  
537 is an important future research direction.

## 538 **4.2 Importance of fusing LFP temporal domain and spectral** 539 **domain features to identify the neural biomarker**

540 Previous studies have exclusively used LFP spectral domain features to identify the  
541 neural biomarker for depression [17,31,32]. By contrast, we found that both the LFP  
542 temporal domain and spectral domain features contributed to our neural biomarker  
543 and that the temporal domain features contributed relatively more than the spectral  
544 domain features. The main contributing temporal domain feature was the Hurst  
545 exponent. The Hurst exponent measures “long-term memory” in temporal dynamics  
546 and is associated with the autocorrelation of a time series [57]. Our results suggest  
547 that the LHb LFP signal’s auto-correlations might change during DBS. The main  
548 contributing (top 2) spectral domain feature was the PSD of the  $\beta$  band. The LHb  $\beta$   
549 band oscillation was also found to correlate with depression symptoms before DBS  
550 treatment in a previous study [27]. These findings highlight the significance of the  $\beta$   
551 band oscillations in LHb as related to depression. Both the Hurst exponent and the  $\beta$   
552 band oscillation features reflect the abnormal synchronization of LHb neural  
553 ensembles underlying depression and might be related to the abnormal burst spiking  
554 phenomena of LHb neurons found in rodents exhibiting depression-like behaviors  
555 [21,22]. The mechanism underlying the contributing LFP temporal domain and  
556 spectral domain features requires further investigation by future research.

### 557 **4.3 DBS frequency differentially modulates the depression** 558 **symptom and neural biomarker**

559 Prior studies have shown that DBS frequency can significantly influence the treatment  
560 efficacy for TRD, e.g., high-frequency DBS has generally yielded better treatment  
561 outcomes than low-frequency DBS [23,58,59]. Consistently, we discovered that a  
562 very low DBS frequency of 1 Hz was not effective in alleviating the depression  
563 symptoms in our patient, but higher frequencies of 20 Hz and 130 Hz were more  
564 effective. Beyond the depression symptom ratings, we additionally found that the  
565 neural biomarker was also consistently modulated by the different DBS frequencies.  
566 DBS frequency might influence the release of neurotransmitters in depression-  
567 targeted pathways [60], thus modulating the neural biomarker and the depression  
568 symptoms. However, similar to other DBS targets, the optimal DBS frequency at LHb  
569 is still also an open question that requires further research.

## 570 **5. Limitations**

571 Our study has several limitations. First, our study had a limited sample size (n-of-1);  
572 further studies with more patients are needed to confirm our findings on LHb neural  
573 biomarkers. Second, despite its powerful classification and tracking performance, our  
574 neural biomarker was identified using only one channel of LFP signals. Incorporating  
575 multi-channel LFP signals in future studies would allow for finding neural biomarkers  
576 with even better performance and a more comprehensive understanding of the neural  
577 mechanism underlying neural biomarker identification. Third, due to the high-  
578 frequency recording noise of our DBS device, we filtered the LFP signal below 30 Hz  
579 to ensure noise rejection. Future work with better recording capability should

580 investigate how higher-frequency LFP temporal and spectral domain features  
581 contribute to the identification of neural biomarkers. Finally, our LFP signals were  
582 recorded with the stimulation temporarily turned OFF to eliminate stimulation  
583 artifacts. While this approach ensured clean LFP signals, it is important to consider  
584 using LFP signals during stimulation to identify neural biomarkers, but this requires  
585 high-performance stimulation artifact removal, which remains challenging [61].

## 586 **6. Conclusion**

587 One patient with TRD reached remission after 41 weeks of LHb DBS treatment. With  
588 a unique data collection of concurrent daily and weekly depression symptom scores  
589 and LHb LFP signals during the entire treatment process, we used machine learning  
590 to identify an LHb neural biomarker of depression symptoms. We demonstrated that  
591 our LHb neural biomarker accurately classified high and low depression symptom  
592 severity states, simultaneously tracked the temporal dynamics of weekly (slow) and  
593 daily (fast) depression symptom variations during the DBS treatment process, and  
594 reflected the depression symptom changes in response to DBS frequency alterations.  
595 Our methods and results hold promise in identifying clinically-viable neural  
596 biomarkers to facilitate future adaptive DBS developments for treating TRD.

597

## 598 **Data availability**

599 The data supporting this study's findings are available from the corresponding author  
600 upon reasonable request.

## 501 **Funding**

502 This work was supported in part by the National Natural Science Foundation of China  
503 under Grants 62336007 and 62306269, in part by the Zhejiang Provincial Natural  
504 Science Foundation of China under Grant LD24H090001, in part by the Key R&D  
505 Program of Zhejiang under Grant 2022C03011, in part by the Starry Night Science  
506 Fund of Zhejiang University Shanghai Institute for Advanced Study under Grant SN-  
507 ZJU-SIAS-002, in part by the Non-profit Central Research Institute Fund of Chinese  
508 Academy of Medical Sciences under Grant 2023-PT310-01, and in part by the  
509 Fundamental Research Funds for the Central Universities under Grant 226-2024-  
510 00127.

## 511 **Author Contributions**

512 Shi Liu: Methodology, Software, Formal analysis, Writing - Original Draft,  
513 Visualization. Yu Qi: Investigation, Resources. Shaohua Hu: Conceptualization,  
514 Resources. Ning Wei: Resources, Data Curation, Writing - Original Draft. Jianmin  
515 Zhang: Conceptualization, Resources. Junming Zhu: Conceptualization, Resources.  
516 Hemmings Wu: Conceptualization, Investigation. Hailan Hu: Conceptualization.  
517 Yuxiao Yang: Conceptualization, Supervision, Methodology, Writing - Review &  
518 Editing, Funding acquisition. Yueming Wang: Conceptualization, Supervision,  
519 Project administration, Funding acquisition, Writing - Review & Editing. All authors  
520 revised and approved the final version of the manuscript.

## 521 **Conflict of Interest**

522 There are no financial conflicts of interest to disclose.

## 523 References

- 524 [1] Organization WH, others. Depression and other common mental  
525 disorders: global health estimates. World Health Organization; 2017.
- 526 [2] Otte C, Gold SM, Penninx BW, Pariante CM, Etkin A, Fava M, et al.  
527 Major depressive disorder. *Nat Rev Dis Primer* 2016;2:16065.  
528 <https://doi.org/10.1038/nrdp.2016.65>.
- 529 [3] Krauss JK, Lipsman N, Aziz T, Boutet A, Brown P, Chang JW, et al.  
530 Technology of deep brain stimulation: current status and future  
531 directions. *Nat Rev Neurol* 2021;17:75–87.  
532 <https://doi.org/10.1038/s41582-020-00426-z>.
- 533 [4] Dandekar MP, Fenoy AJ, Carvalho AF, Soares JC, Quevedo J. Deep  
534 brain stimulation for treatment-resistant depression: an integrative  
535 review of preclinical and clinical findings and translational implications.  
536 *Mol Psychiatry* 2018;23:1094–112. <https://doi.org/10.1038/mp.2018.2>.
- 537 [5] Figeo M, Riva-Posse P, Choi KS, Bederson L, Mayberg HS, Kopell BH.  
538 Deep Brain Stimulation for Depression. *Neurotherapeutics*  
539 2022;19:1229–45. <https://doi.org/10.1007/s13311-022-01270-3>.
- 540 [6] Johnson KA, Okun MS, Scangos KW, Mayberg HS, de Hemptinne C.  
541 Deep brain stimulation for refractory major depressive disorder: a  
542 comprehensive review. *Mol Psychiatry* 2024;1–13.  
543 <https://doi.org/10.1038/s41380-023-02394-4>.
- 544 [7] Mayberg HS, Lozano AM, Voon V, McNeely HE, Seminowicz D, Hamani  
545 C, et al. Deep Brain Stimulation for Treatment-Resistant Depression.  
546 *Neuron* 2005;45:651–60. <https://doi.org/10.1016/j.neuron.2005.02.014>.
- 547 [8] Malone DA, Dougherty DD, Rezai AR, Carpenter LL, Friehs GM,  
548 Eskandar EN, et al. Deep Brain Stimulation of the Ventral  
549 Capsule/Ventral Striatum for Treatment-Resistant Depression. *Biol*  
550 *Psychiatry* 2009;65:267–75.  
551 <https://doi.org/10.1016/j.biopsych.2008.08.029>.
- 552 [9] Schlaepfer TE, Bewernick BH, Kayser S, Mädler B, Coenen VA. Rapid  
553 Effects of Deep Brain Stimulation for Treatment-Resistant Major  
554 Depression. *Biol Psychiatry* 2013;73:1204–12.  
555 <https://doi.org/10.1016/j.biopsych.2013.01.034>.
- 556 [10] Neumann W-J, Huebl J, Brücke C, Gabriëls L, Bajbouj M, Merkl A, et al.  
557 Different patterns of local field potentials from limbic DBS targets in  
558 patients with major depressive and obsessive compulsive disorder. *Mol*  
559 *Psychiatry* 2014;19:1186–92. <https://doi.org/10.1038/mp.2014.2>.
- 560 [11] Bergfeld IO, Mantione M, Hoogendoorn MLC, Ruhe HG, Notten P, van  
561 Laarhoven J, et al. Deep Brain Stimulation of the Ventral Anterior Limb  
562 of the Internal Capsule for Treatment-Resistant Depression A  
563 Randomized Clinical Trial. *Jama Psychiatry* 2016;73:456–64.  
564 <https://doi.org/10.1001/jamapsychiatry.2016.0152>.
- 565 [12] Dougherty DD, Rezai AR, Carpenter LL, Howland RH, Bhati MT,  
566 O'Reardon JP, et al. A Randomized Sham-Controlled Trial of Deep Brain  
567 Stimulation of the Ventral Capsule/Ventral Striatum for Chronic  
568 Treatment-Resistant Depression. *Biol Psychiatry* 2015;78:240–8.  
569 <https://doi.org/10.1016/j.biopsych.2014.11.023>.

- 570 [13] Holtzheimer PE, Husain MM, Lisanby SH, Taylor SF, Whitworth LA,  
571 McClintock S, et al. Subcallosal cingulate deep brain stimulation for  
572 treatment-resistant depression: a multisite, randomised, sham-  
573 controlled trial. *Lancet Psychiatry* 2017;4:839–49.  
574 [https://doi.org/10.1016/S2215-0366\(17\)30371-1](https://doi.org/10.1016/S2215-0366(17)30371-1).
- 575 [14] Coenen VA, Bewernick BH, Kayser S, Kilian H, Boström J, Greschus S,  
576 et al. Superolateral medial forebrain bundle deep brain stimulation in  
577 major depression: a gateway trial. *Neuropsychopharmacology*  
578 2019;44:1224–32. <https://doi.org/10.1038/s41386-019-0369-9>.
- 579 [15] Raymaekers S, Luyten L, Bervoets C, Gabriëls L, Nuttin B. Deep brain  
580 stimulation for treatment-resistant major depressive disorder: a  
581 comparison of two targets and long-term follow-up. *Transl Psychiatry*  
582 2017;7:e1251–e1251. <https://doi.org/10.1038/tp.2017.66>.
- 583 [16] Guidetti M, Marceglia S, Loh A, Harmsen IE, Meoni S, Foffani G, et al.  
584 Clinical perspectives of adaptive deep brain stimulation. *Brain Stimulat*  
585 2021;14:1238–47. <https://doi.org/10.1016/j.brs.2021.07.063>.
- 586 [17] Scangos KW, Khambhati AN, Daly PM, Makhoul GS, Sugrue LP,  
587 Zamanian H, et al. Closed-loop neuromodulation in an individual with  
588 treatment-resistant depression. *Nat Med* 2021;27:1696–700.  
589 <https://doi.org/10.1038/s41591-021-01480-w>.
- 590 [18] Hu H, Cui Y, Yang Y. Circuits and functions of the lateral habenula in  
591 health and in disease. *Nat Rev Neurosci* 2020;21:277–95.  
592 <https://doi.org/10.1038/s41583-020-0292-4>.
- 593 [19] Roman E, Weininger J, Lim B, Roman M, Barry D, Tierney P, et al.  
594 Untangling the dorsal diencephalic conduction system: a review of  
595 structure and function of the stria medullaris, habenula and fasciculus  
596 retroflexus. *Brain Struct Funct* 2020;225:1437–58.  
597 <https://doi.org/10.1007/s00429-020-02069-8>.
- 598 [20] Dai D, Li W, Chen A, Gao X-F, Xiong L. Lateral Habenula and Its  
599 Potential Roles in Pain and Related Behaviors. *ACS Chem Neurosci*  
700 2022;13:1108–18. <https://doi.org/10.1021/acscchemneuro.2c00067>.
- 701 [21] Cui Y, Yang Y, Dong Y, Hu H. Decoding Depression: Insights from Glial  
702 and Ketamine Regulation of Neuronal Burst Firing in Lateral Habenula.  
703 *Cold Spring Harb Symp Quant Biol* 2018;83:141–50.  
704 <https://doi.org/10.1101/sqb.2018.83.036871>.
- 705 [22] Cui Y, Yang Y, Ni Z, Dong Y, Cai G, Foncelle A, et al. Astroglial Kir4.1 in  
706 the lateral habenula drives neuronal bursts in depression. *Nature*  
707 2018;554:323–7. <https://doi.org/10.1038/nature25752>.
- 708 [23] Sartorius A, Kiening KL, Kirsch P, Gall CC von, Haberkorn U, Unterberg  
709 AW, et al. Remission of Major Depression Under Deep Brain Stimulation  
710 of the Lateral Habenula in a Therapy-Refractory Patient. *Biol Psychiatry*  
711 2010;67:e9–11. <https://doi.org/10.1016/j.biopsych.2009.08.027>.
- 712 [24] Wang Z, Cai X, Qiu R, Yao C, Tian Y, Gong C, et al. Case Report: Lateral  
713 Habenula Deep Brain Stimulation for Treatment-Resistant Depression.  
714 *Front Psychiatry* 2021;11. <https://doi.org/10.3389/fpsy.2020.616501>.
- 715 [25] Kiening K, Sartorius A. A new translational target for deep brain  
716 stimulation to treat depression. *EMBO Mol Med* 2013;5:1151–3.  
717 <https://doi.org/10.1002/emmm.201302947>.

- 718 [26] Zhang C, Kim S-G, Li D, Zhang Y, Li Y, Husch A, et al. Habenula deep  
719 brain stimulation for refractory bipolar disorder. *Brain Stimulat*  
720 2019;12:1298–300. <https://doi.org/10.1016/j.brs.2019.05.010>.
- 721 [27] Zhang C, Zhang Y, Luo H, Xu X, Yuan T, Li D, et al. Bilateral Habenula  
722 deep brain stimulation for treatment-resistant depression: clinical  
723 findings and electrophysiological features. *Transl Psychiatry* 2022;12:52.  
724 <https://doi.org/10.1038/s41398-022-01818-z>.
- 725 [28] Wang Z, Jiang C, Guan L, Zhao L, Fan T, Wang J, et al. Deep brain  
726 stimulation of habenula reduces depressive symptoms and modulates  
727 brain activities in treatment-resistant depression. *Nat Ment Health* 2024.  
728 <https://doi.org/10.1038/s44220-024-00286-2>.
- 729 [29] Vissani M, Isaias IU, Mazzoni A. Deep brain stimulation: a review of the  
730 open neural engineering challenges. *J Neural Eng* 2020;17:051002.  
731 <https://doi.org/10.1088/1741-2552/abb581>.
- 732 [30] Priori A, Maiorana N, Dini M, Guidetti M, Marceglia S, Ferrucci R.  
733 Chapter Six - Adaptive deep brain stimulation (aDBS). In: Moro E,  
734 Polosan M, Hamani C, editors. *Int Rev Neurobiol*, vol. 159, Academic  
735 Press; 2021, p. 111–27. <https://doi.org/10.1016/bs.irn.2021.06.006>.
- 736 [31] Alagapan S, Choi KS, Heisig S, Riva-Posse P, Crowell A, Tiruvadi V, et  
737 al. Cingulate dynamics track depression recovery with deep brain  
738 stimulation. *Nature* 2023:1–9. [https://doi.org/10.1038/s41586-023-](https://doi.org/10.1038/s41586-023-06541-3)  
739 [06541-3](https://doi.org/10.1038/s41586-023-06541-3).
- 740 [32] Frank AC, Scangos KW, Larson PS, Norbu T, Lee AT, Lee AM.  
741 Identification of a personalized intracranial biomarker of depression and  
742 response to DBS therapy. *Brain Stimulat* 2021;14:1002–4.  
743 <https://doi.org/10.1016/j.brs.2021.06.009>.
- 744 [33] Sonkusare S, Ding Q, Zhang Y, Wang L, Gong H, Mandali A, et al.  
745 Power signatures of habenular neuronal signals in patients with bipolar  
746 or unipolar depressive disorders correlate with their disease severity.  
747 *Transl Psychiatry* 2022;12:1–9. [https://doi.org/10.1038/s41398-022-](https://doi.org/10.1038/s41398-022-01830-3)  
748 [01830-3](https://doi.org/10.1038/s41398-022-01830-3).
- 749 [34] Cobb BS, Coryell WH, Cavanaugh J, Keller M, Solomon DA, Endicott J,  
750 et al. Seasonal variation of depressive symptoms in unipolar major  
751 depressive disorder. *Compr Psychiatry* 2014;55:1891–9.  
752 <https://doi.org/10.1016/j.comppsy.2014.07.021>.
- 753 [35] Panaite V, Rottenberg J, Bylsma LM. Daily Affective Dynamics Predict  
754 Depression Symptom Trajectories Among Adults with Major and Minor  
755 Depression. *Affect Sci* 2020;1:186–98. [https://doi.org/10.1007/s42761-](https://doi.org/10.1007/s42761-020-00014-w)  
756 [020-00014-w](https://doi.org/10.1007/s42761-020-00014-w).
- 757 [36] Kennedy SH, Giacobbe P, Rizvi SJ, Placenza FM, Nishikawa Y,  
758 Mayberg HS, et al. Deep Brain Stimulation for Treatment-Resistant  
759 Depression: Follow-Up After 3 to 6 Years. *Am J Psychiatry*  
760 2011;168:502–10. <https://doi.org/10.1176/appi.ajp.2010.10081187>.
- 761 [37] Bewernick BH, Kayser S, Sturm V, Schlaepfer TE. Long-Term Effects of  
762 Nucleus Accumbens Deep Brain Stimulation in Treatment-Resistant  
763 Depression: Evidence for Sustained Efficacy.  
764 *Neuropsychopharmacology* 2012;37:1975–85.  
765 <https://doi.org/10.1038/npp.2012.44>.

- 766 [38] Crowell AL, Riva-Posse P, Holtzheimer PE, Garlow SJ, Kelley ME,  
767 Gross RE, et al. Long-Term Outcomes of Subcallosal Cingulate Deep  
768 Brain Stimulation for Treatment-Resistant Depression. *Am J Psychiatry*  
769 2019;176:949–56. <https://doi.org/10.1176/appi.ajp.2019.18121427>.
- 770 [39] Peeters F, Berkhof J, Delespaul P, Rottenberg J, Nicolson NA. Diurnal  
771 mood variation in major depressive disorder. *Emotion* 2006;6:383–91.  
772 <https://doi.org/10.1037/1528-3542.6.3.383>.
- 773 [40] Wirz-Justice A. Diurnal variation of depressive symptoms. *Dialogues*  
774 *Clin Neurosci* 2008;10:337–43.  
775 <https://doi.org/10.31887/DCNS.2008.10.3/awjustice>.
- 776 [41] Scangos KW, Makhoul GS, Sugrue LP, Chang EF, Krystal AD. State-  
777 dependent responses to intracranial brain stimulation in a patient with  
778 depression. *Nat Med* 2021;27:229–31. <https://doi.org/10.1038/s41591-020-01175-8>.
- 780 [42] Bewernick BH, Kayser S, Gippert SM, Coenen VA, Schlaepfer TE.  
781 Acute antidepressant effects of deep brain stimulation – Review and  
782 data from sIMFB-stimulation. *Pers Med Psychiatry* 2017;3:1–7.  
783 <https://doi.org/10.1016/j.pmip.2017.01.002>.
- 784 [43] Xiao J, Provenza NR, Asfour J, Myers J, Mathura RK, Metzger B, et al.  
785 Decoding Depression Severity From Intracranial Neural Activity. *Biol*  
786 *Psychiatry* 2023;94:445–53.  
787 <https://doi.org/10.1016/j.biopsych.2023.01.020>.
- 788 [44] Sani OG, Yang Y, Lee MB, Dawes HE, Chang EF, Shanечи MM. Mood  
789 variations decoded from multi-site intracranial human brain activity. *Nat*  
790 *Biotechnol* 2018;36:954–61. <https://doi.org/10.1038/nbt.4200>.
- 791 [45] Kirkby LA, Luongo FJ, Lee MB, Nahum M, Vleet TMV, Rao VR, et al. An  
792 Amygdala-Hippocampus Subnetwork that Encodes Variation in Human  
793 Mood. *Cell* 2018;175:1688-1700.e14.  
794 <https://doi.org/10.1016/j.cell.2018.10.005>.
- 795 [46] Ashkan K, Rogers P, Bergman H, Ughratdar I. Insights into the  
796 mechanisms of deep brain stimulation. *Nat Rev Neurol* 2017;13:548–  
797 54. <https://doi.org/10.1038/nrneurol.2017.105>.
- 798 [47] Ramasubbu R, Lang S, Kiss ZHT. Dosing of Electrical Parameters in  
799 Deep Brain Stimulation (DBS) for Intractable Depression: A Review of  
800 Clinical Studies. *Front Psychiatry* 2018;9.  
801 <https://doi.org/10.3389/fpsy.2018.00302>.
- 802 [48] Yeung AWK, Wong NSM. The Historical Roots of Visual Analog Scale in  
803 Psychology as Revealed by Reference Publication Year Spectroscopy.  
804 *Front Hum Neurosci* 2019;13.  
805 <https://doi.org/10.3389/fnhum.2019.00086>.
- 806 [49] Schiratti J-B, Le Douget J-E, Le van Quyen M, Essid S, Gramfort A. An  
807 ensemble learning approach to detect epileptic seizures from long  
808 intracranial EEG recordings. *ICASSP 2018 - 2018 IEEE Int. Conf.*  
809 *Acoust. Speech Signal Process. ICASSP, Calgary, Canada: IEEE; 2018.*  
810 <https://doi.org/10.1109/ICASSP.2018.8461489>.
- 811 [50] Banville H, Wood SUN, Aimone C, Engemann D-A, Gramfort A. Robust  
812 learning from corrupted EEG with dynamic spatial filtering. *NeuroImage*  
813 2022;251:118994. <https://doi.org/10.1016/j.neuroimage.2022.118994>.



- 314 [51] Engemann DA, Mellot A, Höchenberger R, Banville H, Sabbagh D,  
315 Gemein L, et al. A reusable benchmark of brain-age prediction from  
316 M/EEG resting-state signals. *NeuroImage* 2022;262:119521.  
317 <https://doi.org/10.1016/j.neuroimage.2022.119521>.
- 318 [52] Giorgino T. Computing and Visualizing Dynamic Time Warping  
319 Alignments in R: The dtw Package. *J Stat Softw* 2009;31:1–24.  
320 <https://doi.org/10.18637/jss.v031.i07>.
- 321 [53] Sakoe H, Chiba S. Dynamic programming algorithm optimization for  
322 spoken word recognition. *IEEE Trans Acoust Speech Signal Process*  
323 1978;26:43–9. <https://doi.org/10.1109/TASSP.1978.1163055>.
- 324 [54] Knowland D, Lim BK. Circuit-based frameworks of depressive behaviors:  
325 The role of reward circuitry and beyond. *Pharmacol Biochem Behav*  
326 2018;174:42–52. <https://doi.org/10.1016/j.pbb.2017.12.010>.
- 327 [55] Kalin NH. The Critical Relationship Between Anxiety and Depression.  
328 *Am J Psychiatry* 2020;177:365–7.  
329 <https://doi.org/10.1176/appi.ajp.2020.20030305>.
- 330 [56] Sampogna G, Toni C, Catapano P, Rocca BD, Di Vincenzo M, Luciano  
331 M, et al. New trends in personalized treatment of depression. *Curr Opin*  
332 *Psychiatry* 2024;37:3. <https://doi.org/10.1097/YCO.0000000000000903>.
- 333 [57] Wei M, Qin J, Yan R, Li H, Yao Z, Lu Q. Identifying major depressive  
334 disorder using Hurst exponent of resting-state brain networks.  
335 *Psychiatry Res Neuroimaging* 2013;214:306–12.  
336 <https://doi.org/10.1016/j.pscychresns.2013.09.008>.
- 337 [58] Liu Y, Postupna N, Falkenberg J, Anderson ME. High frequency deep  
338 brain stimulation: What are the therapeutic mechanisms? *Neurosci*  
339 *Biobehav Rev* 2008;32:343–51.  
340 <https://doi.org/10.1016/j.neubiorev.2006.10.007>.
- 341 [59] Sani S, Busnello J, Kochanski R, Cohen Y, Gibbons RD. High-frequency  
342 measurement of depressive severity in a patient treated for severe  
343 treatment-resistant depression with deep-brain stimulation. *Transl*  
344 *Psychiatry* 2017;7:e1207–e1207. <https://doi.org/10.1038/tp.2017.145>.
- 345 [60] McIntyre CC, Anderson RW. Deep brain stimulation mechanisms: the  
346 control of network activity via neurochemistry modulation. *J Neurochem*  
347 2016;139:338–45. <https://doi.org/10.1111/jnc.13649>.
- 348 [61] Iturrate I, Pereira M, Millán J del R. Closed-loop electrical  
349 neurostimulation: Challenges and opportunities. *Curr Opin Biomed Eng*  
350 2018;8:28–37. <https://doi.org/10.1016/j.cobme.2018.09.007>.
- 351

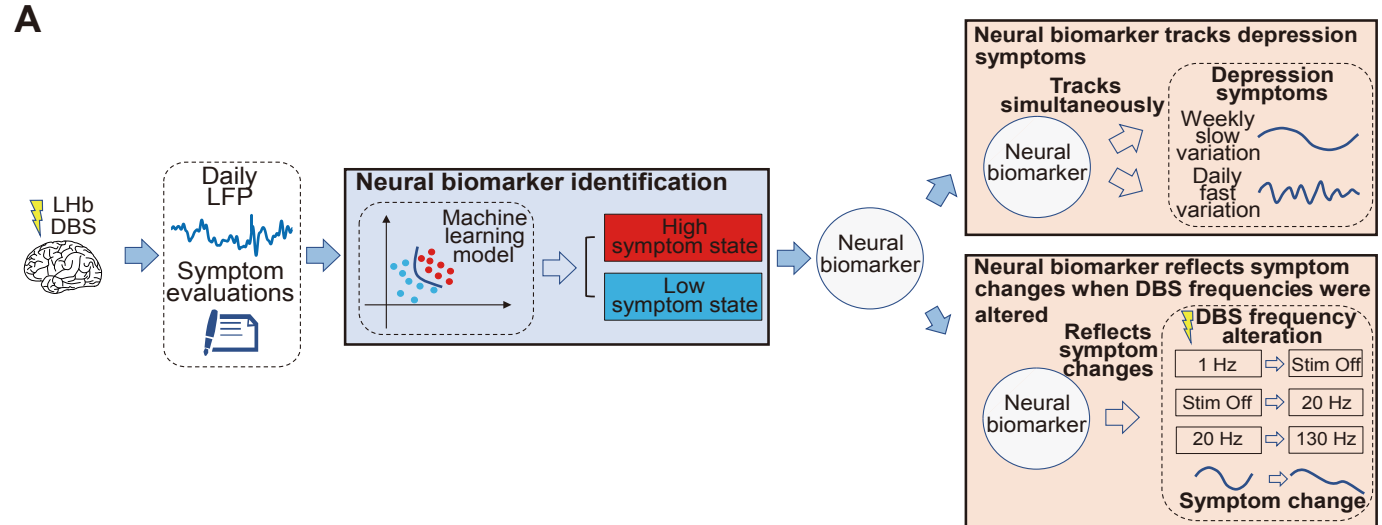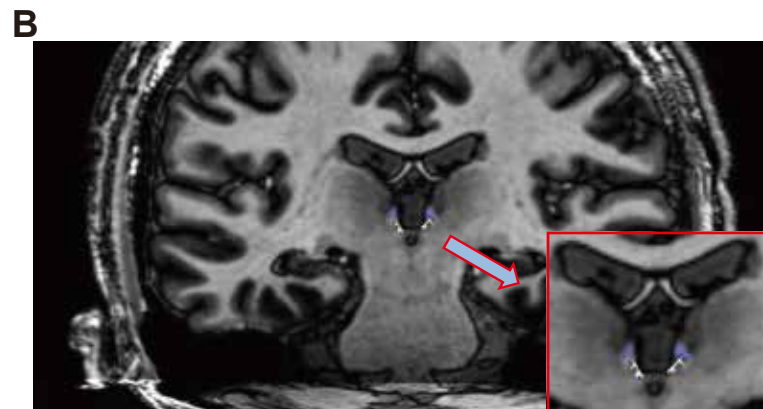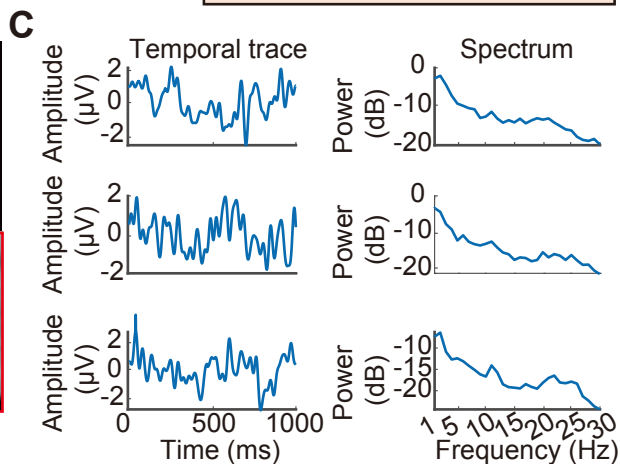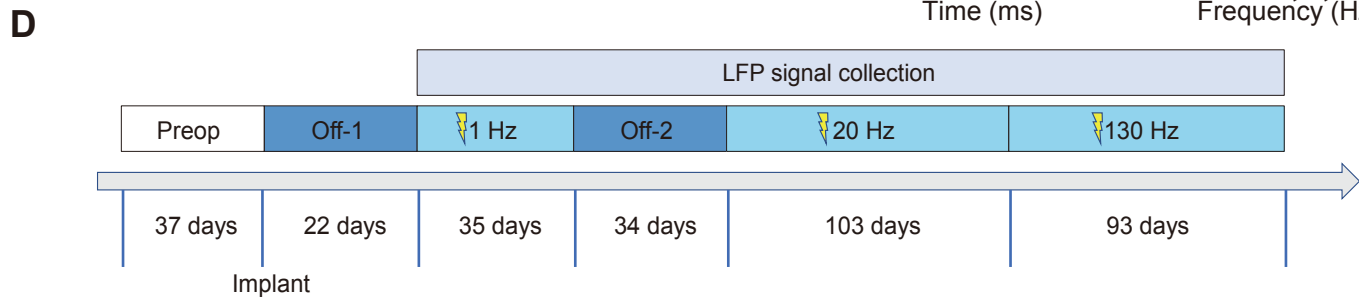

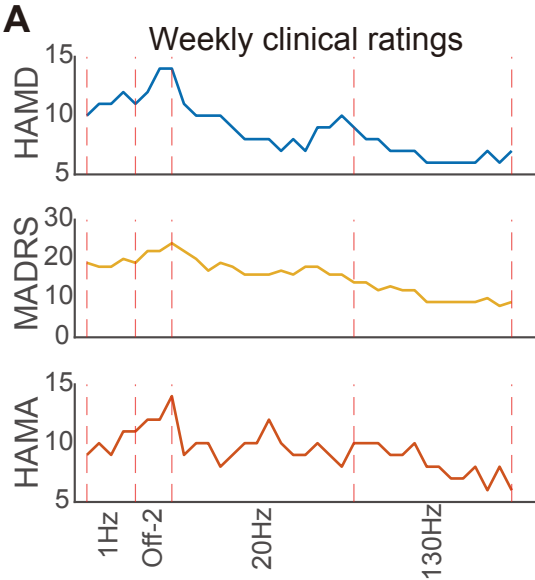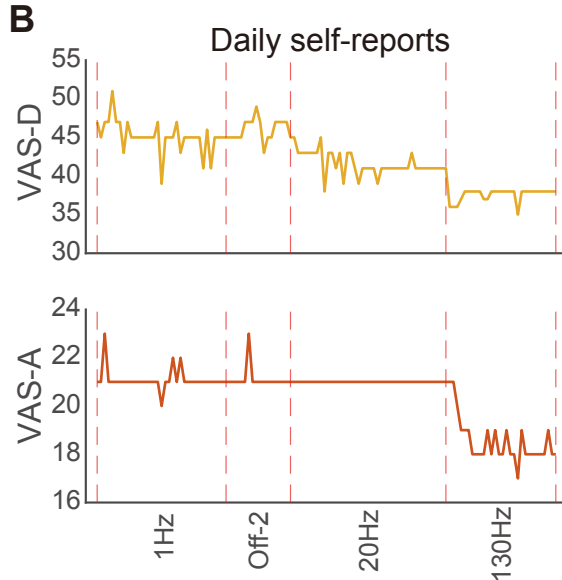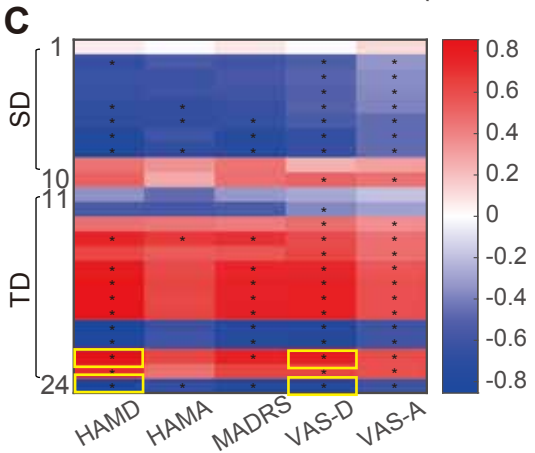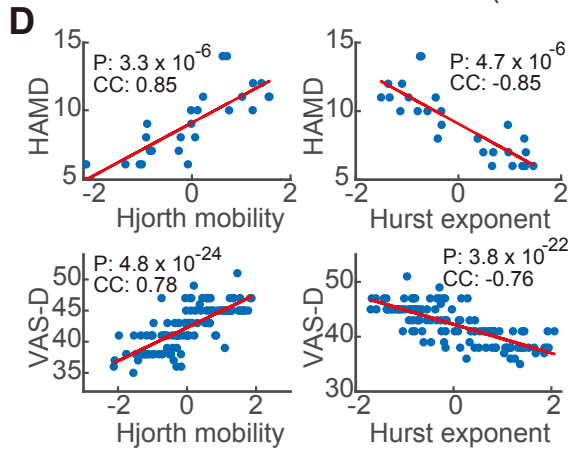

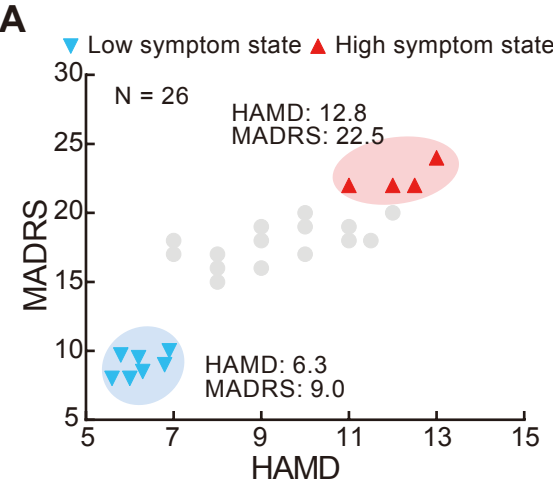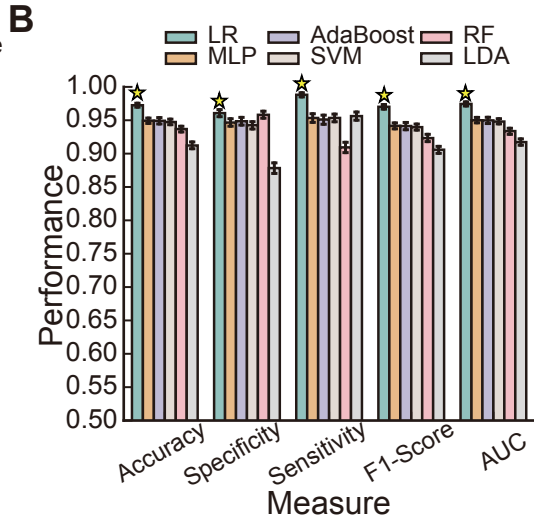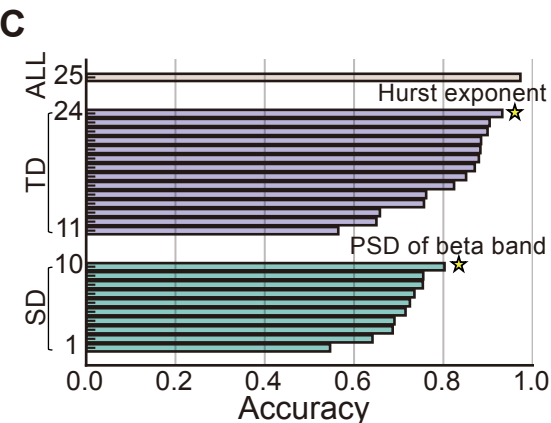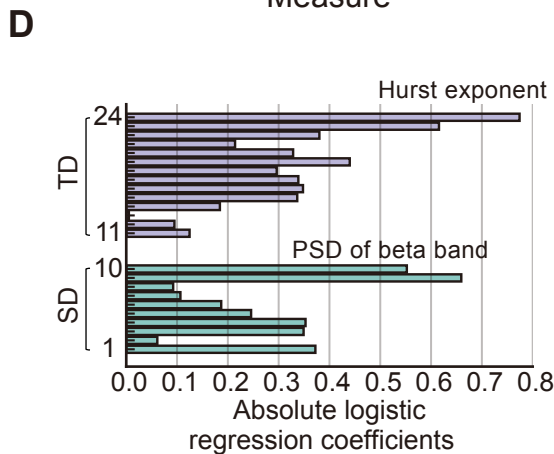

**A**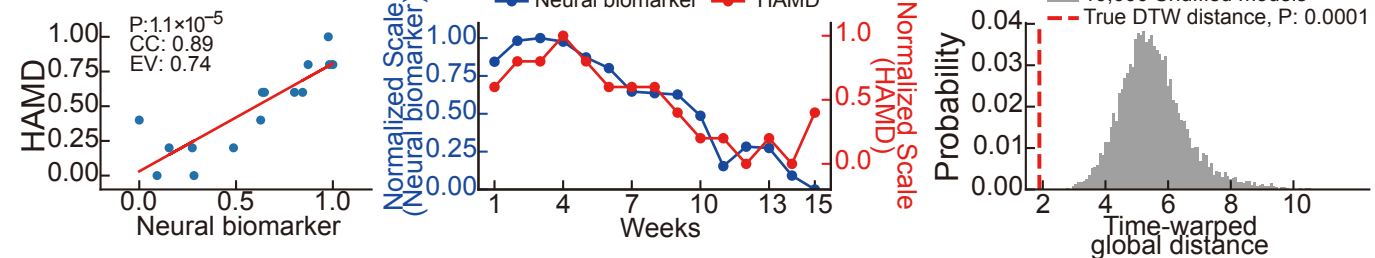**B**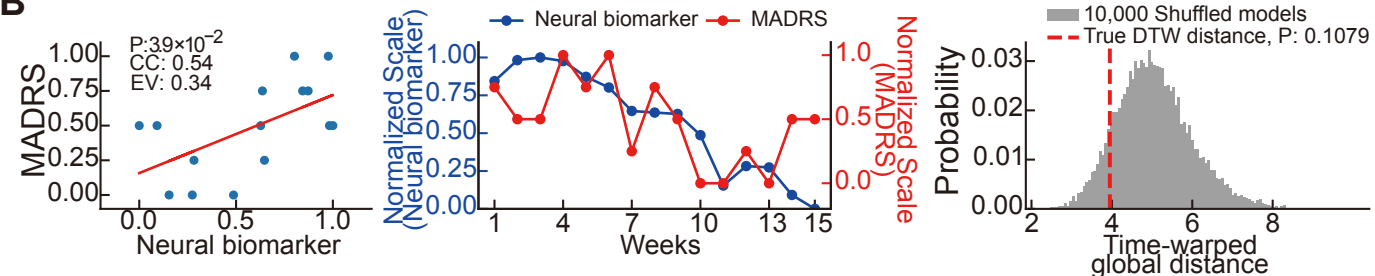**C**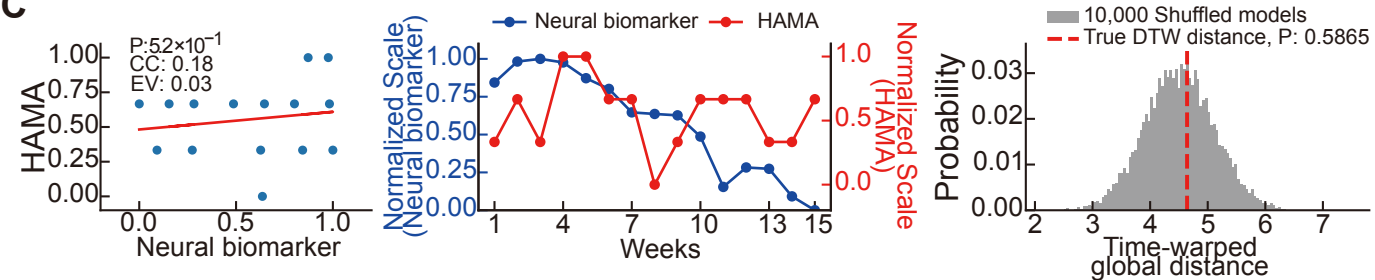

**A**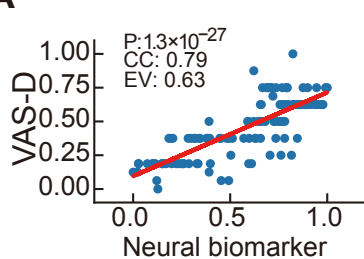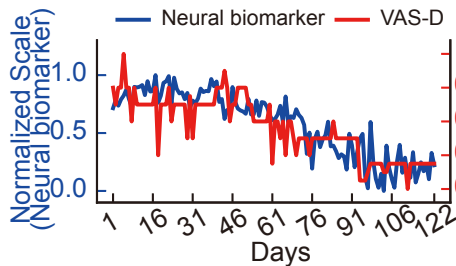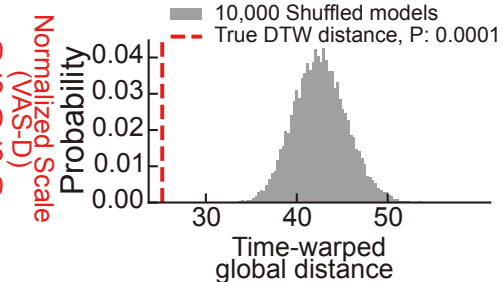**B**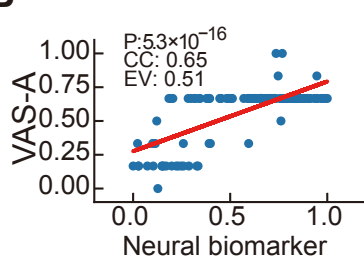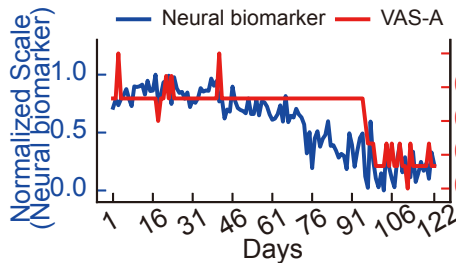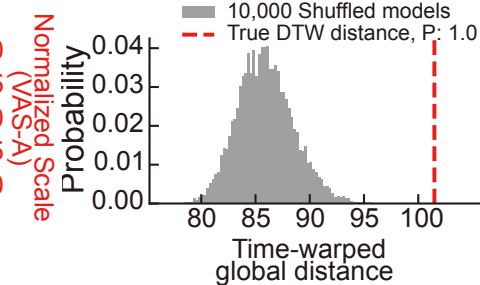

**A**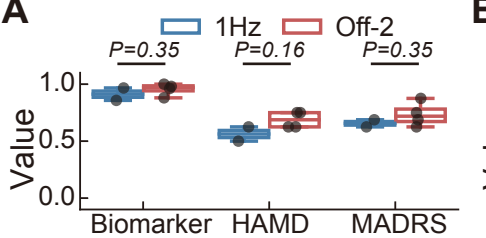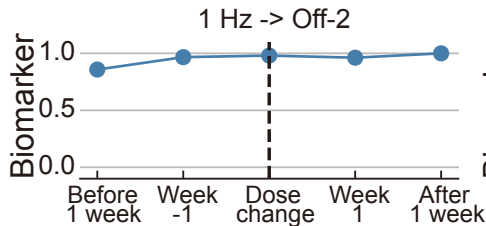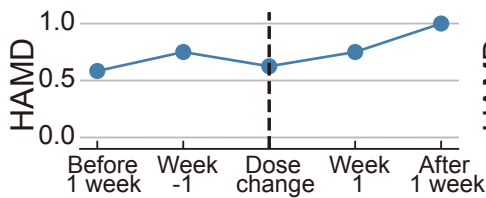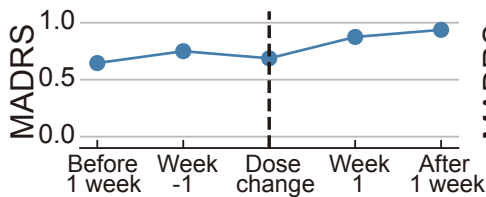**B**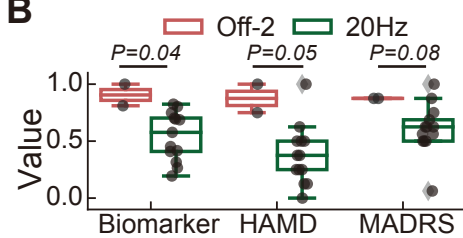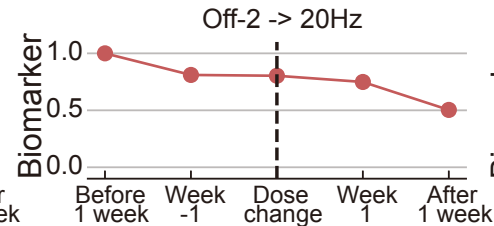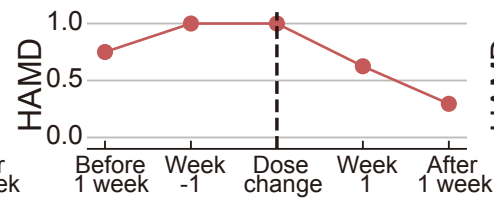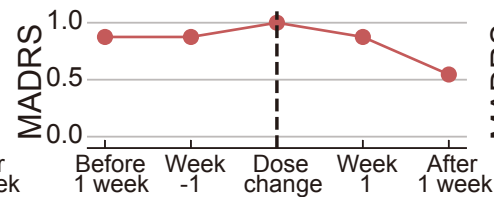**C**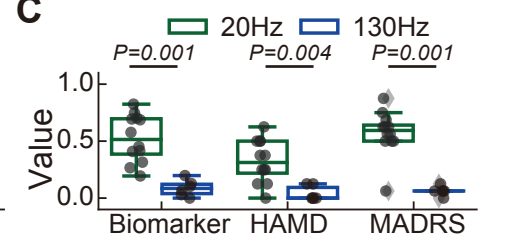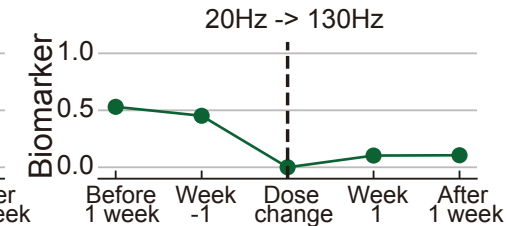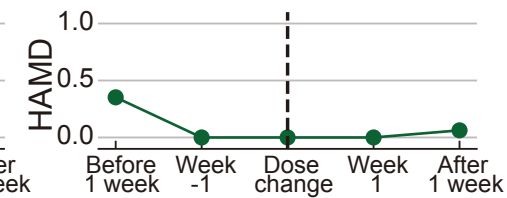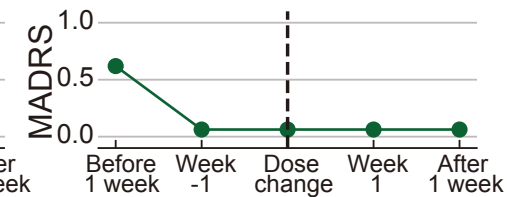

Source: https://medrxiv.org/content/10.1101/2024.07.29.24310966v1.full.pdf
