1 **A Habenula Neural Biomarker Simultaneously**  
2 **Tracks Weekly and Daily Symptom Variations**  
3 **during Deep Brain Stimulation Therapy for**  
4 **Depression**

5 Shi Liu<sup>1,2,3,7</sup>, Yu Qi<sup>1,3</sup>, Shaohua Hu<sup>4</sup>, Ning Wei<sup>4</sup>, Jianmin Zhang<sup>5</sup>, Junming  
6 Zhu<sup>5</sup>, Hemmings Wu<sup>5</sup>, Hailan Hu<sup>6</sup>, Yuxiao Yang<sup>1,2,3,5\*</sup> and Yueming  
7 Wang<sup>1,3\*</sup>

8 <sup>1</sup> *MOE Frontier Science Center for Brain Science and Brain-machine Integration,*  
9 *Nanhu Brain-computer Interface Institute, Hangzhou, 310058, China.*

10 <sup>2</sup> *State Key Laboratory of Brain-machine Intelligence, Hangzhou, 311100, China.*

11 <sup>3</sup> *College of Computer Science and Technology, Zhejiang University,*  
12 *Hangzhou, 310058, China.*

13 <sup>4</sup> *Department of Psychiatry, The First Affiliated Hospital, Zhejiang University*  
14 *School of Medicine, Hangzhou, 310003, China.*

15 <sup>5</sup> *Department of Neurosurgery, The Second Affiliated Hospital of Zhejiang*  
16 *University, Hangzhou, 310058, China.*

17 <sup>6</sup> *School of Brain Science and Brain Medicine, Zhejiang University,*  
18 *Hangzhou, 310058, China.*

19 <sup>7</sup> *Lingang Laboratory, Shanghai, 200031, China.*

20 \* *Corresponding author(s). E-mail(s): yuxiao.yang@zju.edu.cn;*  
21 *yumingwang@zju.edu.cn*

22  
23 **Running title:** A Habenula Biomarker for Depression DBS Therapy

24 **Keywords:** deep brain stimulation; treatment-resistant depression; habenula; local  
25 field potential; neural biomarker; machine learning

## Abstract

26

27 Deep brain stimulation (DBS) targeting the lateral habenula (LHb) is a promising  
28 therapy for treatment-resistant depression (TRD) but its clinical effect has been  
29 variable, which can be improved by adaptive DBS (aDBS) guided by a neural  
30 biomarker of depression symptoms. A clinically-viable neural biomarker is desired to  
31 classify depression symptom states, track both slow and fast symptom variations  
32 during the treatment, respond to DBS parameter alterations, and be neurobiologically  
33 interpretable, which is currently lacking. Here, we conducted a study on one TRD  
34 patient who achieved remission following a 41-week LHb DBS treatment, during  
35 which we assessed slow symptom variations using weekly clinical ratings and fast  
36 variations using daily self-reports. We recorded daily LHb local field potentials (LFP)  
37 concurrently with the reports during the entire treatment process. We then used  
38 machine learning methods to identify a personalized depression neural biomarker  
39 from spectral and temporal LFP features. The identified neural biomarker classified  
40 high and low depression symptom severity states with a cross-validated accuracy of  
41 0.97, with the most contributing spectral and temporal feature being LFP beta band  
42 power and Hurst exponent, respectively. It further simultaneously tracked both  
43 weekly (slow) and daily (fast) depression symptom variation dynamics, achieving test  
44 data explained variance of 0.74 and 0.63, respectively. It also responded to DBS  
45 frequency alterations. Finally, it can be neurobiologically interpreted as indicating  
46 changes in LHb excitatory and inhibitory balance during DBS treatment. Together,  
47 our results hold promise to identify clinically-viable neural biomarkers to facilitate  
48 future aDBS for treating TRD.

## 49 **1. Introduction**

50 Major depressive disorder (MDD) is one of the most common neuropsychiatric  
51 disorders, affecting over 300 million individuals worldwide [1]. Approximately 30%  
52 of MDD patients are treatment-resistant, meaning they do not respond adequately to  
53 at least two antidepressant trials [2]. Deep brain stimulation (DBS) is a neurosurgical  
54 procedure that allows targeted circuit-based neuromodulation [3]. It has emerged as a  
55 promising treatment option for patients with treatment-resistant depression (TRD) [4–  
56 6], as shown by open-label studies targeting various brain structures involved in the  
57 brain’s “reward” system that mediates positive motivations. Such targets include the  
58 subcallosal cingulate cortex (SCC) [7], the ventral capsule/ventral striatum (VC/VS)  
59 [8], the medial forebrain bundle (MFB) [9], and the bed nucleus of the stria terminalis  
60 (BNST) [10]. However, several recent double-blinded clinical trials have shown that  
61 the effects of DBS targeting these brain structures are inconsistent across patients  
62 [11–15]. As a potential improvement over DBS, adaptive DBS (aDBS) optimizes  
63 DBS parameters in real-time by using neural signals as feedback for enhancing  
64 clinical efficacy [16]. A recent study implements aDBS targeting VC/VS in a TRD  
65 patient by triggering stimulation only when the local field potential (LFP) signal  
66 pattern indicates worsening of depression symptoms, achieving rapid alleviation of  
67 depression symptoms [17].

68 The lateral habenula (LHb) is a hub structure that plays a central role in the brain’s  
69 “anti-reward” system that mediates negative motivations [18–20]. Animal studies  
70 have systematically shown that the local bursting firing patterns in LHb are closely  
71 related to depression-like behaviors and that neuromodulation of LHb has significant

72 antidepressant effects [21–23]. Several clinical studies have reported single-patient  
73 depression symptom alleviation following LHb DBS since 2010 [24–27]. On the  
74 other hand, two recent clinical studies on seven or six patients has shown more  
75 variable effects of LHb DBS across patients [28,29]. Similar to other DBS targets,  
76 aDBS for LHb also provides a promising path towards improved and more consistent  
77 treatment effects across TRD patients.

78 A critical and fundamental requirement for developing LHb aDBS is the  
79 identification of an LHb neural biomarker of depression symptoms during the DBS  
80 treatment to provide the necessary feedback signal [30,31]. A population-level SCC  
81 LFP spectral power biomarker has been identified for tracking depression symptom  
82 recovery with SCC DBS in five TRD patients [32]. Personalized amygdala and BNST  
83 LFP gamma power biomarkers have been identified for optimizing VC/VS DBS [33].  
84 For LHb DBS, LFP signals have been recorded before the DBS treatment starts but  
85 not during the multi-month-long treatment process [28,29,34] and several studies  
86 have found statistical correlations between pre-treatment LHb LFP spectral features  
87 and after-treatment depression symptom ratings [28,29,34]. However, it is unknown  
88 whether the identified LFP features can classify depression symptom severity states  
89 or track the temporal dynamics of depression symptom variations during the DBS  
90 treatment process. Therefore, a useful neural biomarker for realizing LHb aDBS is  
91 still lacking.

92 A clinically-viable neural biomarker is desired to be able to track both the slow  
93 and fast temporal dynamics of depression symptom variations during DBS. This is  
94 because both natural and DBS-induced depression symptom changes can vary at  
95 different time scales, with both slow-changing dynamics over months or weeks [35–

96 39] and fast-changing dynamics over hours or days [9,40–43]. Existing neural  
97 biomarker studies have focused on tracking the temporal dynamics of either slow or  
98 fast symptom variations. The aforementioned SCC neural biomarker for SCC DBS  
99 tracks the temporal dynamics of the weekly symptom variations over 24 weeks [32].  
100 The aforementioned amygdala and BNST neural biomarkers for VC/VS DBS track  
101 the faster temporal dynamics of symptom variations within several days [17,33].  
102 Several other studies have also identified resting-state (without DBS) neural  
103 biomarkers of relatively fast depression symptom variations within several days using  
104 multisite intracranial electroencephalography (iEEG) [44–46]. However, to date,  
105 identifying a neural biomarker that can simultaneously track the temporal dynamics  
106 of both slow and fast depression symptom variations, in particular during LHb DBS  
107 treatment, remains elusive.

108 Moreover, the neural biomarker needs to reflect the dose effect of different DBS  
109 parameters for optimizing stimulation parameters in aDBS. Since the DBS  
110 mechanism for treating TRD is largely unknown [47], only few studies have  
111 experimentally explored the dose effect of different DBS amplitudes on human neural  
112 signals [17,32,33]. On the other hand, DBS frequency also has been shown to play a  
113 key role in altering TRD symptoms [4–6,48]. However, how different LHb DBS  
114 parameters, especially stimulation frequencies, alter neural signals or neural  
115 biomarkers in TRD patients remains unknown.

116 Finally, the neural biomarker should possess a certain level of neurobiological  
117 interpretability. A critical neurobiological property that has been implicated in the  
118 pathophysiology of MDD [21–23] is the excitatory/inhibitory (E/I) balance of LHb  
119 activity. E/I balance refers to the equilibrium between synaptic excitation and

120 inhibition received by neurons [49]. LHb has excitatory and inhibitory connections  
121 with a wide range of brain regions involved in the affect, reward, and cognition  
122 dimensions of MDD symptom, such as the dorsal raphe nucleus, nucleus accumbens,  
123 hippocampus, medial prefrontal cortex, etc [50]. Excessive excitation of LHb has  
124 been implicated in the pathology of MDD [21–23]. By contrast, electrical stimulation  
125 of LHb in animal depression models has been shown to inhibit overly-excited local  
126 neural activity, thus modulating the dopaminergic and serotonergic activity and  
127 generate complex excitatory and inhibitory effects over a large network that may have  
128 led to depression-like behavior alleviation [51,52]. Furthermore, a prior study has  
129 found a correlation between pre-treatment LHb E/I balance with depression  
130 symptoms in DBS patients [34]. However, how LHb E/I balance changes during  
131 human patient DBS treatment and whether there exists a neural biomarker that can  
132 track such changes has not been investigated.

133 Here, to close the above gaps, we conducted LHb DBS on one TRD patient where  
134 we evaluated the patient’s symptoms and concurrently collected daily LHb LFP  
135 signals during the entire 41-week long treatment process (Figure 1). With this unique  
136 longitudinal dataset and by using machine learning techniques, we identified a  
137 clinically-viable neural biomarker from spectral and temporal LHb features, where  
138 the most contributing spectral and temporal features are the  $\beta$  (12-30 Hz) band power  
139 and Hurst exponent, respectively. Our identified neural biomarker (1) accurately  
140 classified high and low depression symptom severity states; (2) significantly tracked  
141 the temporal dynamics of weekly (slower) and daily (faster) depression symptom  
142 variations during the DBS treatment; (3) reflected the depression symptom changes

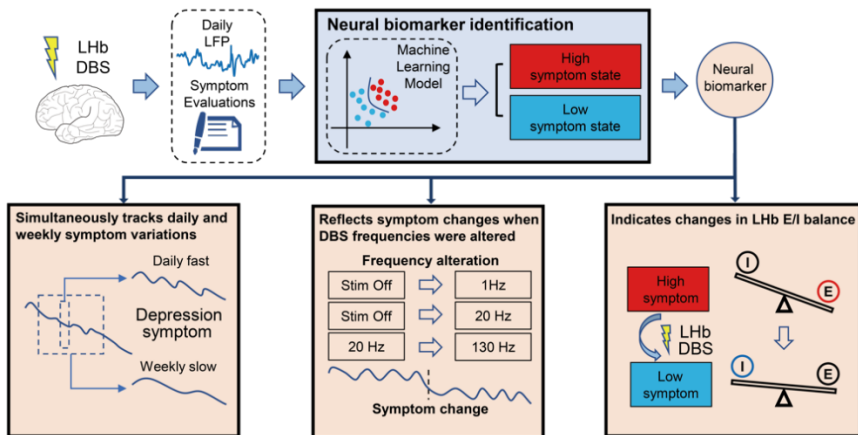

**Figure 1.** Study framework. During the Lhb DBS treatment of one TRD patient, we used weekly clinical ratings and daily self-reports to evaluate the symptom variations, where we simultaneously collected daily LFP signals from Lhb. Using machine learning models, we identified a neural biomarker that classified high and low depression symptom states during the DBS treatment. Using data not used in neural biomarker identification, we evaluated and interpreted the neural biomarker in terms of 1) simultaneously tracking the temporal dynamics of weekly slow and daily fast variations of depression symptoms; 2) reflecting symptom changes when DBS frequencies were altered; 3) indicating changes in Lhb E/I balance.

143 in response to DBS frequency alterations. Finally, the neural biomarker can be  
 144 interpreted as an indicator of the changes in Lhb E/I balance during the DBS  
 145 treatment. Together, our results have implications for identifying clinically-viable  
 146 neural biomarkers to facilitate future Lhb aDBS developments for treating TRD.

## 147 **2. Materials and Methods**

### 148 **2.1 Participant**

149 This study included a male TRD patient aged 36-40 years old (see Note S1 for detailed  
 150 patient medical information) participating in a clinical trial of Lhb DBS treatment  
 151 starting in October 2021. The patient provided informed consent for participation in

152 the clinical trial. This study received approval from the Ethics Committee of Zhejiang  
153 University School of Medicine Second Affiliated Hospital (protocol number  
154 20210218). It was registered at [www.clinicaltrials.gov](http://www.clinicaltrials.gov) (IR2021001074), where  
155 detailed information regarding the inclusion and exclusion criteria can be accessed.

156 At the beginning of the clinical trial, two independent psychiatrists evaluated the  
157 patient's psychotic symptoms using the 17-item Hamilton Depression Rating Scale  
158 (HAMD), the Montgomery Asberg Depression Scale (MADRS), and the Hamilton  
159 Anxiety Rating Scale (HAMA) as baseline assessments. In addition to the psychiatric  
160 assessments, the patient underwent a comprehensive physical examination, various  
161 mental scale assessments, and a magnetic resonance imaging (MRI) examination. We  
162 carefully ensured that other psychiatric diagnoses outlined in the Diagnostic and  
163 Statistical Manual of Mental Disorders-Fifth Edition (DSM-5) were excluded.

## 164 **2.2 Surgical procedure**

165 A standard DBS implantation procedure was employed. Bilateral quadripolar  
166 electrodes (1200-40, SceneRay, Suzhou, China) were surgically implanted in the LHb  
167 under local anesthesia (Figure 2A). The DBS electrodes had a diameter of 1.27 mm  
168 and a lead length of 400 mm. Each electrode's four contacts measured 1.5 mm in  
169 length with a spacing of 0.5 mm. The LHb targeting was guided by preoperative MRI  
170 sequences. After confirming the absence of stimulation side effects through  
171 intraoperative testing, an implantable pulse generator (SR1101, SceneRay) was  
172 placed under general anesthesia. The DBS device was also capable of recording and  
173 wireless transmitting LFP signals (Figure 2B).



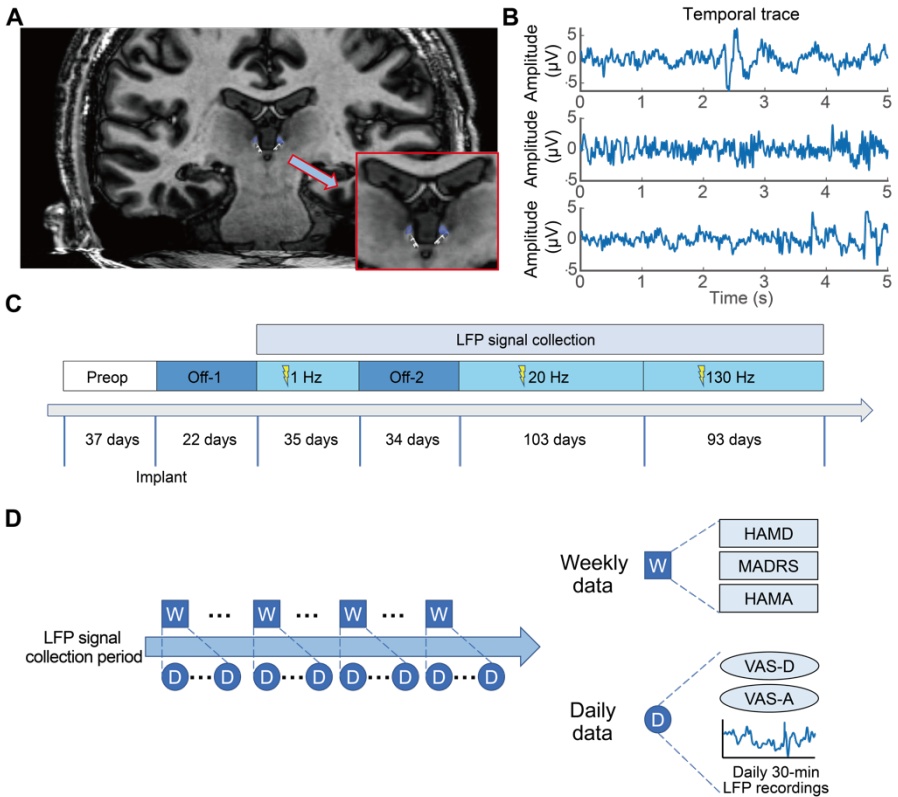

**Figure 2.** Experiment design. (A) MRI visualization showing the DBS lead placement within the patient's LHB. The shaded blue area indicates the volume of tissue activated by the DBS. (B) Temporal dynamics of example epochs of LFP signals after preprocessing. (C) Lhb DBS Treatment Timeline. The entire treatment process consisted of six stages. LFP signal collection began after the activation of 1 Hz stimulation. (D) Longitudinal data collection over time. Data were collected using two different time scales: 1) daily self-reports and 30-min LFP signals recorded around the self-reports; 2) weekly clinical ratings.

## 174 2.3 Fiber tracking of LHB

175 We used diffusion tensor images from the magnetic resonance imaging (MRI)  
 176 examination to conduct fiber tracking of LHB with a standard procedure reported in  
 177 a previous study [53]. First, we manually created the LHB as the region of interest  
 178 (ROI) in standard Montreal Neurological Institute 152 (MNI152) space. The ROI in  
 179 MNI152 standard space was then registered to the diffusion space of our patient for

180 tractography. To ensure the exclusion of non-brain tissue, we employed the 'bet2'  
181 function, and the cerebrospinal fluid mask was used as an exclusion mask. We further  
182 performed the probabilistic tractography processing using tools from the FSL  
183 Diffusion Toolbox. The LHb ROI was used as the seed mask to generate whole-brain  
184 distribution maps using FSL's probtrackX tool. We performed 5000 streamline  
185 samples per voxel with distance normalization to ensure comprehensive coverage.  
186 Subsequently, the resulting fiber distribution maps were non-linearly registered back  
187 to the MNI152 standard space. To eliminate artifactual connections and noise, a  
188 threshold value of 1% was implemented.

## 189 **2.4 DBS treatment process and symptom evaluations**

190 During the bilateral DBS treatment process, we made multiple adjustments to the  
191 stimulation parameters to achieve the best therapeutic effect. We divided the treatment  
192 process into six stages based on the alterations of stimulation parameters (Figure 2C):  
193 1) the “Preop” stage, the time before DBS implantation; 2) the “Off-1” stage, patient  
194 recovery with DBS turned off; 3) the “1 Hz” stage, activation of 1 Hz stimulation; 4)  
195 the “Off-2” stage, DBS turned off because of unnoticed power off; 5) the “20 Hz”  
196 stage, re-activation of 20 Hz stimulation; 6) the “130 Hz” stage, activation of 130 Hz  
197 stimulation. More details can be found in Note S2. The entire duration of DBS  
198 treatment spanned 41 weeks (starting from DBS implantation).

199 The efficacy of DBS treatment was evaluated from two perspectives: clinician  
200 evaluation and self evaluation (Figure 2D). For clinician evaluation, a psychologist  
201 blinded to the current stimulation parameters and their adjustments evaluated the  
202 patient’s depression and anxiety symptoms on a weekly basis using standardized

203 rating scales (HAMD, MADRS, HAMA). Response is defined as a 50% or greater  
204 improvement on the HAMD score from the pre-treatment baseline. Remission is  
205 defined as achieving a HAMD score of 7 or less. The psychologist also evaluated the  
206 patient's emotional blunting and cognitive functioning during the treatment. For every  
207 four to six months, the psychologist utilized the Oxford Depression Questionnaire  
208 (ODQ), a self-report tool to assess emotional blunting, along with two cognitive  
209 assessment tools (MATRICS Consensus Cognitive Battery (MCCB) and THINC-  
210 integrated tool (THINC-it)) to evaluate the patient's cognitive abilities. For self  
211 evaluation, the patient used the Visual Analogue Scale (VAS) for depression (VAS-D)  
212 and anxiety (VAS-A) to self-report the symptom severity. Self-reported VASA and  
213 VAS-D had been used to assess the rapid effects of antidepressants [54]. To facilitate  
214 daily data collection, we established an online questionnaire system where the patient  
215 could conveniently complete the self-reports via the smartphone or computer.

## 216 **2.5 LFP signal recording, signal processing, and feature** 217 **extraction**

218 After activating the 1 Hz stimulation, we collected daily LFP signals (30 minutes per  
219 day) concurrent with daily self-reported VAS-D and VAS-A (Figure 2D, details in  
220 section 2.4). LFP signals were recorded at a sampling rate of 1000 Hz. Notably,  
221 stimulation was deactivated during the signal acquisition process. We reconstructed  
222 the electrode positions using MRI and selected two contacts in the left hemisphere for  
223 bipolar recording of a single LFP channel. The patient was instructed to attempt daily  
224 LFP recording and VAS-D/VAS-A reporting. Throughout the entire 41-week (287-  
225 day) treatment, the patient was able to activate LFP recording and report VAS-D and

226 VAS-A on 122 days distributed across 26 weeks. Therefore, the subsequent analyses  
227 focused on the LFP signals, VAS-D, and VAS-A scores recorded from these 122 days,  
228 and the HAMD, MADRS, and HAMA scores recorded for the 26 weeks.

229 Custom MATLAB scripts (MathWorks Inc., Natick, MA, USA) were used to  
230 preprocess the LFP signals. The LFP signals were first band-pass filtered from 1 to  
231 30 Hz using a Butterworth filter of order 12 to avoid the noise observed in higher  
232 frequency bands. Then, we divided the daily 30-minute LFP signals into 10-second  
233 epochs with a 50% overlap. Next, we used a standard procedure (details in Note S4)  
234 to remove bad epochs from daily LFP signals (example temporal traces of  
235 preprocessed LFP epochs were shown in Figure 2B).

236 For each remaining LFP epoch, we computed its spectral domain (SD) and  
237 temporal domain (TD) features. SD features included PSD of the four bands ( $\delta$  (delta,  
238 1-4 Hz),  $\theta$  (theta, 4-8 Hz),  $\alpha$  (alpha, 8-12 Hz), and  $\beta$  (beta, 12-30 Hz)) and phase-  
239 amplitude coupling (PAC) for six specific pairs of coupling. TD features included  
240 fourteen temporal domain features used in previous study [55], e.g., Hjorth mobility,  
241 Higuchi fractal dimension, Kurtosis, peak-to-peak amplitude, Hurst exponent, etc.  
242 These features capture the temporal properties of LFP from probabilistic distribution  
243 and information theory perspectives and have been widely used in brain signal  
244 analyses [56,57]. As a result, we obtained 24 features, comprising 10 SD features and  
245 14 TD features for each LFP epoch. Details of these 24 features are included in Table  
246 S1 and Note S3. Finally, we averaged each feature across LFP epochs within the same  
247 day and obtained a single averaged 24-dimensional LFP feature vector. Our  
248 subsequent analyses were based on the daily LFP features as computed above.

## 249 **2.6 Correlational analyses between LFP features and symptoms**

250 We conducted Spearman’s rank correlation analyses between LFP features and  
251 symptoms. For each day, we correlated each daily LFP feature with the daily VAS-D  
252 and VAS-A. For each week, we computed the average of LFP features across the days  
253 that belonged to this week, resulting in weekly LFP features; we then correlated each  
254 weekly LFP feature with the weekly clinical evaluation scales HAMD, HAMA, and  
255 MADRS. Bonferroni correction was used to adjust for multiple comparisons.

## 256 **2.7 Identification of neural biomarker**

257 Next, we used a data-driven method to identify an LHb neural biomarker of  
258 depression symptoms, where we built a machine learning model to use LFP features  
259 to classify high and low depression symptom states.

260 First, we defined the high and low depression symptom states of the patient by k-  
261 means clustering the weekly depression scales HAMD and MADRS similar to prior  
262 work [17]. Among the total 26 weeks (122 days) of LFP data, 7 weeks (29 days) of  
263 LFP data belonged to the low depression symptom state (labeled 0), 4 weeks (22 days)  
264 of LFP data belonged to the high depression symptom state (labeled 1). The remaining  
265 15 weeks (71 days) belonging to the transition symptom state were unlabeled and  
266 used as test data for subsequent biomarker tracking evaluation (see next section).

267 Second, based on the labeled data, we built a machine learning model to use the  
268 LFP features to classify high and low depression symptom states. We constructed six  
269 machine learning models: logistic regression (LR), multilayer perceptron, adaptive  
270 boosting, support vector machine, random forest, and linear discriminant analysis. We

271 trained and tested these models using 5-fold cross-validations that were repeated 200  
272 times, where we computed the averaged cross-validated classification accuracy,  
273 specificity, sensitivity, F1 score, and Receiver Operating Characteristic (ROC) Area  
274 Under the Curve (AUC) score as the performance metrics. The model with the highest  
275 accuracy was selected for further analyses.

276 Third, the chosen model was retrained with all labeled data, leading to a “neural  
277 biomarker model”. This model takes the LFP feature as input and outputs the decision  
278 variable as the neural biomarker value (e.g., in the LR model, the decision variable  
279 was computed from the decision probability via the inverse sigmoid function). This  
280 allows us to compute a neural biomarker value for any given LFP feature. Higher  
281 neural biomarker values indicate more severe depression symptoms.

282 In essence, our identified neural biomarker aggregates spectral and temporal  
283 domain features from the LHb LFP signal to classify high and low depression states  
284 during DBS treatment.

## 285 **2.8 Evaluation of the neural biomarker**

286 We evaluated the neural biomarker in terms of (1) tracking the temporal dynamics of  
287 weekly symptom variations; (2) tracking the dynamics of daily symptom variations;  
288 (3) reflecting changes in symptom variations induced by DBS frequency alterations.

289 First, we investigated tracking the temporal dynamics of weekly depression and  
290 anxiety symptom scales that were not used in neural biomarker identification. We  
291 took the daily LFP features as inputs to the neural biomarker model and computed the  
292 output daily neural biomarkers. We then averaged the daily neural biomarkers  
293 belonging to the same week to compute the weekly neural biomarkers. We next

294 correlated the weekly neural biomarker values with the weekly HAMD, MADRS, and  
295 HAMA scores, respectively, using Spearman's rank correlation analyses with  
296 explained variance (EV) as an estimation. We further analyzed the temporal dynamics  
297 in the neural biomarker and symptoms, using the dynamic time warping (DTW)  
298 distance [58] to measure the temporal tracking ability of the neural biomarker. Both  
299 the neural biomarker values and the symptom scales were normalized to a range of 0  
300 to 1. We used a size three Sakoe–Chiba warping window in the DTW analysis  
301 following prior work [17,59]. A smaller DTW distance represents better temporal  
302 tracking. To determine the significance of the computed DTW distance, we randomly  
303 shuffled the temporal sequence of the neural biomarker 10,000 times and used the  
304 corresponding shuffled DTW distances as the null hypothesis distribution for  
305 computing the  $P$  value.

306       Second, we investigated tracking the temporal dynamics of the daily VAS-D and  
307 VAS-A self-reports, which were also not used in neural biomarker identification.  
308 Similar to the weekly case, daily LFP features were used to generate daily neural  
309 biomarkers, which were then correlated with daily VAS-D and VAS-A reports. DTW  
310 was again used to assess the temporal tracking of daily depression symptom variations.

311       Third, we qualitatively compared trends in weekly neural biomarkers and  
312 depression ratings across three DBS frequency alterations (1 Hz to Off-2, Off-2 to 20  
313 Hz, 20 Hz to 130 Hz). We used the two-sided Wilcoxon rank-sum test to check whether  
314 there was a significant difference between the two stages before and after alteration.  
315 We also averaged the neural biomarker values and depression ratings across five time  
316 periods for each case: 1) from the beginning of this stage to two weeks before the  
317 alteration week; 2) during the week before the alteration week; 3) during the alteration

318 week; 4) during one week after the alteration week; 5) averaged from two weeks after  
319 the alteration week to the end of this stage.

## 320 **2.9 Interpretation of the neural biomarker**

321 We then conducted multiple analyses to interpret the neurobiological implications  
322 of the identified neural biomarker. First, we recognized the most contributing spectral  
323 and temporal LFP features of the neural biomarker. To evaluate their contributions,  
324 we performed individual classification of the high and low symptom states using each  
325 feature separately. The performance of the classification provided an indication of the  
326 level of information contained within each feature regarding the symptom state. To  
327 further validate the contribution of these features, we compared the weights of each  
328 feature in the neural biomarker identification model (see Section 2.7).

329 Second, we related the neural biomarker to the LHb E/I balance. Following prior  
330 work [60], we computed the LFP spectrum's  $1/f$  slope as a quantitative indicator of  
331 E/I balance, where a larger absolute  $1/f$  slope indicates more inhibition. More  
332 specifically, after calculating the PSD of the remaining epochs after the removal of  
333 bad epochs (see Section 2.5), we averaged the spectrum across LFP epochs within the  
334 same day and selected a frequency range of interest to be 1-30 Hz (our signal spectrum  
335 range). We then estimated  $1/f$  slope from the log-transformed PSD using linear  
336 regression, with the coefficient representing the  $1/f$  slope. We next normalized the E/I  
337 indicator by computing the percentage change relative to the  $1/f$  slope of the first LFP  
338 recording day. We finally correlated this E/I indicator with the identified neural  
339 biomarker and its most contributing features using standard Spearman's rank  
340 correlation analyses.



341 **3. Results**

342 **3.1 LHb DBS improved the patient’s depression symptoms,**  
343 **emotional blunting, and cognitive functions**

344 We first examined the TRD patient’s depression and anxiety symptom changes  
345 throughout the LHb DBS treatment process. At the beginning of treatment, the  
346 patient’s baseline HAMD score was 20, MADRS score was 25, and HAMA score  
347 was 16. In terms of the weekly clinical ratings (Table 1 and Figure 3A), the patient  
348 responded at week 14 (HAMD score dropped to 10; MADRS score dropped to 19;  
349 HAMA score dropped to 8) and achieved remission by the end of the 41-week  
350 treatment (HAMD score was 7; MADRS score was 9; HAMA score was 6). The daily  
351 self-reports followed a similar decreasing trend (Figure 3B). Such a consistent trend  
352 was confirmed by the strong positive correlation between the daily self-reports and  
353 weekly clinical ratings (Spearman’s  $\rho > 0.5$ ,  $P < 0.05$  for all pair-wise  
354 correlations; see Table S2 and Figure S1 for details).

355 **Table 1. Assessment of depression and anxiety symptoms with weekly clinical**  
356 **ratings. mean  $\pm$  s.e.m.**

| Weekly clinical ratings | LHb DBS treatment stage |                  |                  |                  |                  |
|-------------------------|-------------------------|------------------|------------------|------------------|------------------|
|                         | Baseline<br>N=1         | 1Hz<br>N=4       | Off-2<br>N=3     | 20Hz<br>N=15     | 130Hz<br>N=14    |
| <b>HAMD</b>             | 20                      | 11.00 $\pm$ 0.41 | 12.33 $\pm$ 0.88 | 9.20 $\pm$ 0.46  | 6.86 $\pm$ 0.25  |
| <b>MADRS</b>            | 25                      | 18.75 $\pm$ 0.48 | 21.00 $\pm$ 1.00 | 17.93 $\pm$ 0.63 | 10.64 $\pm$ 0.56 |
| <b>HAMA</b>             | 16                      | 9.75 $\pm$ 0.48  | 11.67 $\pm$ 0.33 | 9.80 $\pm$ 0.39  | 8.29 $\pm$ 0.38  |

357

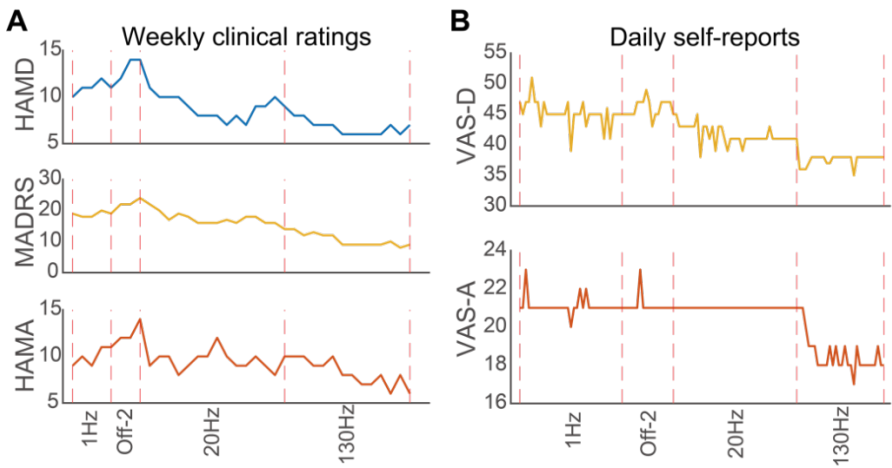

**Figure 3.** Changes of weekly and daily symptom scores during the LHb DBS treatment. (A) Changes of weekly clinical ratings during the treatment. The vertical dashed lines represent different treatment stages indicated by the x-axis labels. (B) Changes of daily self-reports during the treatment. The vertical dashed lines represent different treatment stages indicated by the x-axis labels.

358 Besides alleviating depression and anxiety symptoms as indicated by the weekly  
 359 clinical ratings and daily self-reports, LHb DBS also improved the patient’s emotional  
 360 blunting and cognitive functioning. The total scores of ODQ dropped from the  
 361 presurgery baseline of 117 to 94, and most of the ODQ subdomains continuously  
 362 decreased during the DBS treatment (Table 2), indicating an improvement of  
 363 emotional blunting. MCCB and THINC-it as cognitive function instruments  
 364 suggested cognitive performance improved compared to the presurgery baseline  
 365 (Table 3). Specifically, in the MCCB test, persistent improvements were found in  
 366 processing speed, verbal learning, visual learning, reasoning/problem solving, and  
 367 social cognition, while attention and working memory temporarily improved but  
 368 fluctuated during the treatment. In the THINC-it test, the performance of Symbol  
 369 check and Trail task, which were highly related to working memory [61] and

370 executive functioning [62], showed persistent improvements, while PHQ-D-5,  
 371 Spotter, and CodeBreaker task performance fluctuated.

372 **Table 2. Assessment of emotional blunting with Oxford Depressive Symptoms**  
 373 **Questionnaire (ODQ).**

| Domains of ODQ          | Follow up after activation of stimulation |         |          |          |
|-------------------------|-------------------------------------------|---------|----------|----------|
|                         | Baseline                                  | 69 days | 173 days | 270 days |
| General Reduction       | 23                                        | 24      | 23       | 19       |
| Reduction in Positive   | 25                                        | 25      | 24       | 20       |
| Emotional Detachment    | 25                                        | 25      | 16       | 18       |
| Not Caring              | 22                                        | 23      | 18       | 18       |
| Antidepressant as Cause | 22                                        | 22      | 18       | 19       |
| Total                   | 117                                       | 119     | 99       | 94       |

374 **Table 3. Assessment of cognitive functioning with MATRICS Consensus**  
 375 **Cognitive Battery (MCCB) and THINC-it.**

|                                              | Domains of MCCB                         | Follow up after activation of stim. |          |          |
|----------------------------------------------|-----------------------------------------|-------------------------------------|----------|----------|
|                                              |                                         | Baseline                            | 173 days | 271 days |
| MATRICS<br>Consensus<br>Cognitive<br>Battery | Processing Speed                        | 27                                  | 55       | 55       |
|                                              | Attention/Vigilance                     | 24                                  | 41       | 37       |
|                                              | Working Memory                          | 47                                  | 58       | 52       |
|                                              | Verbal Learning                         | 36                                  | 40       | 43       |
|                                              | Visual Learning                         | 52                                  | 63       | 63       |
|                                              | Reasoning/Problem Solving               | 30                                  | 44       | 42       |
|                                              | Social Cognition                        | 25                                  | 29       | 28       |
|                                              | Domains of THINC-it                     | Follow up after activation of stim. |          |          |
|                                              |                                         | Baseline                            | 69 days  | 271 days |
| THINC-it                                     | PHQ-D-5                                 | 600                                 | 400      | 1000     |
|                                              | Spotter (Reaction time)                 | 2128                                | 2192     | 656      |
|                                              | Symbol check (N-back)                   | 1332                                | 2000     | 2334     |
|                                              | CodeBreaker (Digit symbol substitution) | 850                                 | 1150     | 950      |
|                                              | Trails (Trail making test)              | 1103                                | 2096     | 2191     |

376 **3.2 Multiple spectral and temporal Lhb LFP features**

377 **significantly correlated with symptom changes**

378 During the Lhb DBS treatment process, we recorded daily Lhb LFP signals.

379 Therefore, we then investigated how the LFP features correlated with the patient's

380 symptom changes (Figure 4A). We found that many of the temporal and spectral

381 domain Lhb LFP features were significantly correlated with the weekly clinical

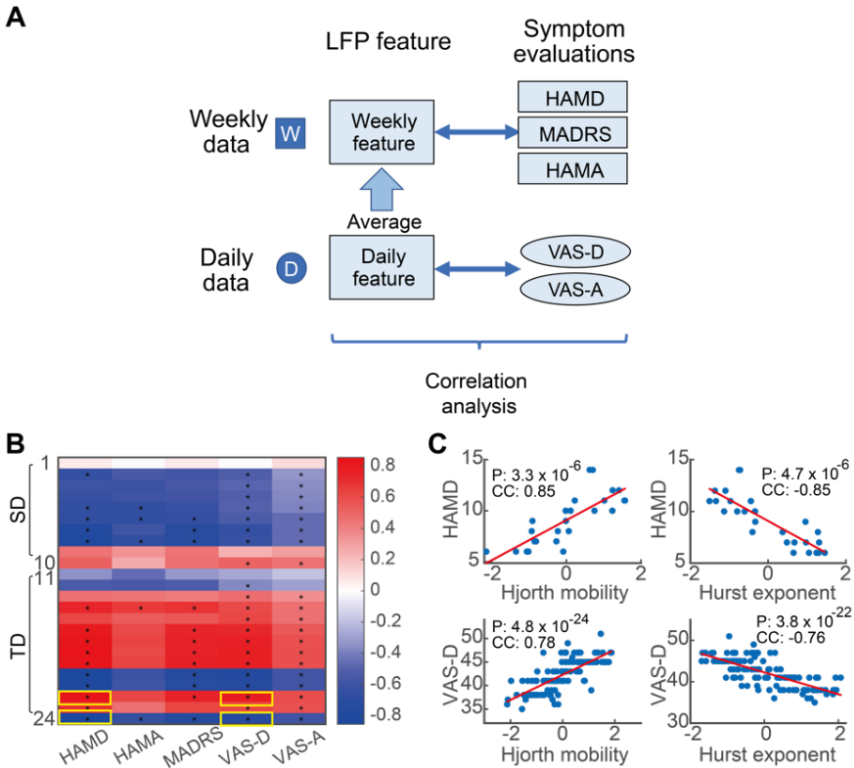

**Figure 4.** Correlations between the symptom evaluations (weekly and daily symptom scores) and the LFP features (temporal and spectral domain features). (A) Schematic diagram of correlation analysis. (B) Heatmap of the correlation coefficients. Each cell shows the correlation coefficient (CC) value between one LFP feature (y-axis) and one symptom score (x-axis), and cells marked with \* indicate the coefficients that are significantly different from zero (Bonferroni corrected  $p < 0.05$ ). (C) Positive and negative correlation examples with the weekly HAMD score and daily VAS-D score as shown by the yellow boxes in (B).

382 ratings and daily self-reports (Figure 4B). For example, Hurst exponent exhibited the  
383 strongest correlations with both weekly HAMD scores and daily VAS-D scores  
384 (Figure 4C). The results indicate that it is feasible to identify an LHb neural biomarker  
385 of depression symptoms from the LFP temporal and spectral domain features.

### 386 **3.3 Accurate classification of high and low symptom severity** 387 **states led to the identification of an LHb neural biomarker**

388 We next used the LFP temporal and spectral features to identify a neural biomarker  
389 that can classify high and low depression symptom severity states (Figure 5A). We  
390 started by defining a state of high symptom severity and a state of low symptom  
391 severity via clustering the weekly depression scales HAMD and MADRS (Figure 5B).  
392 The high symptom state (7 weeks) had an average HAMD score of 12.8 and an  
393 average MADRS score of 22.5, while the low symptom state (4 weeks) had an  
394 average HAMD score of 6.3 and an average MADRS score of 9.0. We then used LFP  
395 temporal domain and spectral domain features from these 11 weeks to classify the  
396 high and low symptom severity states via six machine learning models in cross-  
397 validation. Among these six models, the LR model performed better than other more  
398 complicated models (Figure 5C and table S3). Specifically, for the LR model, the  
399 cross-validated classification accuracy was  $0.973 \pm 0.002$  (mean  $\pm$  s.e.m.), the  
400 specificity was  $0.961 \pm 0.003$ , the sensitivity was  $0.988 \pm 0.002$ , the F1-score was  
401  $0.970 \pm 0.002$ , and the AUC score was  $0.974 \pm 0.001$ , which were all significantly  
402 higher than other models (Wilcoxon rank sum test, Bonferroni corrected  $P < 0.05$  for  
403 all comparisons), suggesting that the LR model was best suited for classifying the  
404 collected data. We thus selected the LR model for further analyses. Then, we retrained

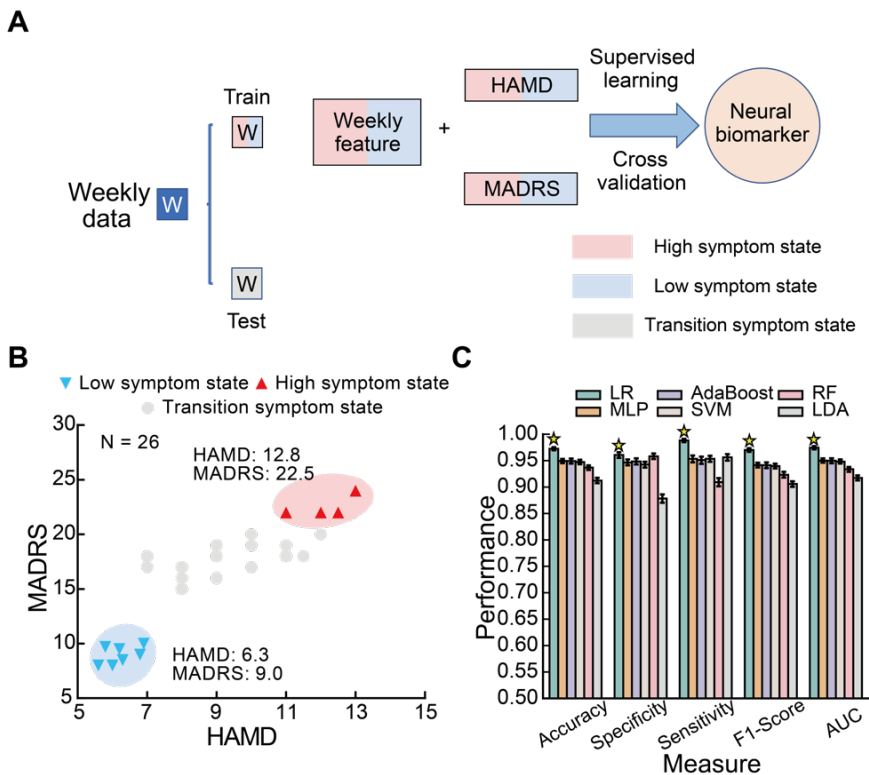

**Figure 5.** Accurate classification of high and low depression symptom severity states by the identified neural biomarker. (A) Schematic diagram of neural biomarker identification. Note that the identification was conducted using supervised learning and cross-validation purely based on the weekly data in the high and low symptom states. The rest weekly data in the transition symptom state were used later to test the tracking performance of the identified neural biomarker. (B) Clustering of depression symptom severity states. We clustered the HAMD and MADRS scores to obtain three distinct symptom states: a high depression symptom severity state (shaded in red), a low depression symptom severity state (shaded in blue), and a transition state (shaded in grey). Each point represents data of a week. The average HAMD and MADRS scores of the high and low clusters are also indicated in the figure. (C) Classification performance of different classifiers. The bar represents mean and the whiskers represent the 95% confidence interval. Six classification models (different colors) were compared in terms of five performance matrices (different x-axis groups): accuracy, specificity, sensitivity, F1-Score and AUC. The best model was indicated by a yellow star for each metric. Classification model abbreviations: logistic regression (LR), multilayer perceptron (MLP), adaptive boosting (AdaBoost), support vector machine (SVM), random forest (RF), and linear discriminant analysis (LDA).

405 the LR model using the 11 weeks' labeled data, resulting in the neural biomarker  
 406 model, which model took the LFP features as input and output the model decision  
 407 value as the neural biomarker, with higher values indicating worse symptoms.

408 **3.4 The identified neural biomarker simultaneously tracked the**  
409 **temporal dynamics of weekly and daily depression symptom**  
410 **variations during LHb DBS treatment**

411 After identifying the neural biomarker of depression symptoms, we evaluated its  
412 ability to track the temporal dynamics of slow (weekly) and fast (daily) depression  
413 symptom variations during the LHb DBS treatment. For slow weekly variations, we  
414 used the identified neural biomarker model to compute weekly neural biomarker  
415 values (see Section 2.8). We used the weekly neural biomarker values to predict the  
416 associated weekly clinical ratings, where we strictly excluded the weekly data that  
417 were used to identify the neural biomarker (i.e., the prediction was based on unseen  
418 transition symptom state data not used in training the neural biomarker model, Figure  
419 6A). We found that the weekly neural biomarker values significantly predicted the  
420 HAMD scores (Figure 6B,  $EV=0.74$ ,  $P = 1.1 \times 10^{-5}$ ). Further, considering the  
421 temporal dynamics in detail by using the DTW distance analysis (see Section 2.8),  
422 we found that the weekly neural biomarker significantly tracked the temporal  
423 dynamics of weekly HAMD score variations (random shuffle  $P = 0.00001$ ).  
424 Consistently, the weekly neural biomarker values significantly predicted the MADRS  
425 scores (Figure 6C,  $EV=0.34$ ,  $P = 0.039$ ), and tracked the temporal dynamics in the  
426 DTW distance analysis with marginally significant statistics (random shuffle  $P =$   
427  $0.1079$ ). Conversely, the weekly neural biomarker values did not predict the HAMA  
428 scores (Figure 6D,  $EV=0.03$ ,  $P = 5.2 \times 10^{-1}$ ) or tracked the temporal dynamics  
429 (random shuffle  $P = 0.5865$ ).

430

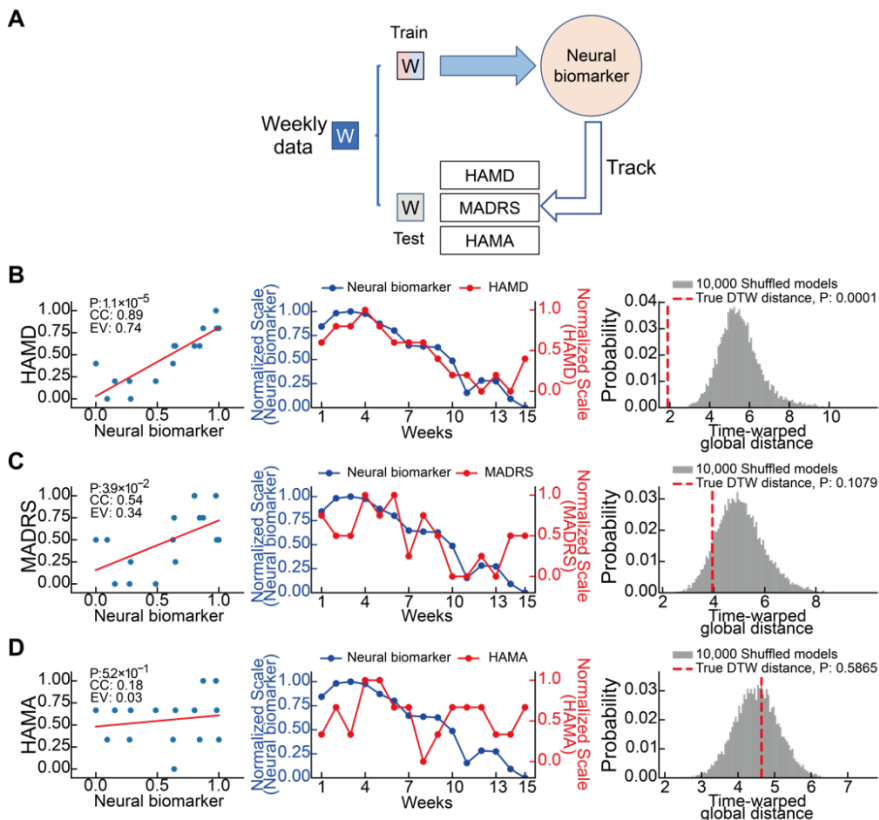

**Figure 6.** Accurate tracking of the temporal dynamics of weekly depression symptom variations by the identified neural biomarker. (A) Schematic diagram of analyzing the neural biomarker's weekly tracking performance. The neural biomarker, derived from the training data of weekly high and low symptom states, was tested by tracking the unseen weekly clinical ratings of transition symptom state. (B) Left: correlation between the identified neural biomarker values and the weekly HAMD scores. CC: correlation coefficient. EV: Explained variance. Middle: neural biomarker tracking of the weekly HAMD score dynamics over time. Right: the DTW distance analysis result for evaluating the significance of tracking in the middle panel. Smaller DTW distance represents better tracking. Note that we normalized both the neural biomarker values and the symptom scales to a range of 0 to 1 using min-max normalization for better visualization. (C) same as (B) but for the weekly MADRS scores. (D) same as (B) but for the weekly HAMA scores.

431 For fast daily variations, we used the identified neural biomarker model to  
 432 compute daily neural biomarker values and used the daily neural biomarker values to  
 433 predict the associated daily self-reports (again, data not used in training the neural  
 434 biomarker model, Figure 7A). We found that the daily neural biomarker values



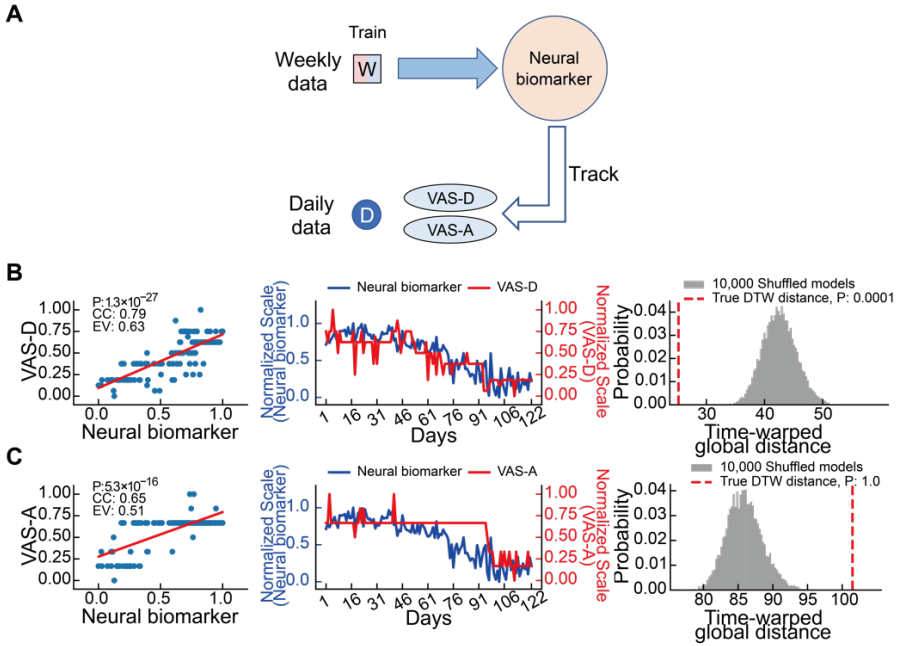

**Figure 7.** Accurate tracking of the temporal dynamics of daily depression symptom variations by the identified neural biomarker. (A) Schematic diagram of analyzing the neural biomarker's daily tracking performance. The neural biomarker, derived from the training data of weekly high and low symptom states, was tested by tracking the unseen daily self-reports. (B) Left: correlation between the identified neural biomarker values and the daily VAS-D scores unseen in neural biomarker identification. EV: Explained variance. Middle: neural biomarker tracking of the daily VAS-D score dynamics over time. Right: the DTW distance analysis result for evaluating the significance of tracking in the middle panel. Smaller DTW distance represents better tracking. (C) same as (B) but for the daily VAS-A scores.

435 significantly predicted the VAS-D scores (Figure 7B,  $EV=0.63$ ,  $P = 1.3 \times 10^{-27}$ )  
 436 and showed significant tracking of VAS-D dynamics (random shuffle  $P = 0.0001$ ).  
 437 By contrast, while the daily neural biomarker values predicted the VAS-A scores  
 438 (Figure 7C,  $EV=0.51$ ,  $P = 5.3 \times 10^{-16}$ ) but the daily neural biomarker did not  
 439 significantly track VAS-A dynamics (random shuffle  $P = 1.00$ ).

440

441 In summary, the results show that the identified neural biomarker significantly  
442 tracked the temporal dynamics of both weekly and daily variations in depression  
443 symptoms during the LHb DBS treatment and specifically tracked depression  
444 symptoms rather than anxiety symptoms.

### 445 **3.5 The identified neural biomarker reflected changes of** 446 **depression symptoms in response to DBS parameter** 447 **alterations**

448 A useful neural biomarker for DBS also needs to reflect the effect of different DBS  
449 parameters. We thus evaluated if the identified neural biomarker could reflect changes  
450 in depression symptoms in response to DBS parameter alterations. We applied three  
451 different DBS frequencies during the treatment: 1 Hz, 20 Hz, and 130 Hz. For the  
452 DBS alteration from 1 Hz to stimulation off (Off-2, the DBS device shut down due to  
453 unnoticed power off), there was a trend of increasing for the neural biomarker, HAMD,  
454 and MADRS while the statistical tests were not significant due to the limited sample  
455 size (Figure 8A, 1Hz vs. stimulation off, normalized mean $\pm$ s.e.m., neural biomarker:  
456  $0.912\pm 0.055$  vs.  $0.956\pm 0.026$ ,  $P=0.35$ ; HAMD:  $0.562\pm 0.062$  vs.  $0.688\pm 0.036$ ,  
457  $P=0.16$ ; MADRS:  $0.656\pm 0.031$  vs.  $0.734\pm 0.053$ ,  $P=0.35$ ), which indicated a  
458 rebound trend of depression symptoms due to the disruption of DBS treatment. For  
459 the DBS alteration from stimulation off (Off-2) to 20 Hz stimulation, the neural  
460 biomarker, HAMD, and MADRS consistently decreased (Figure 8B, stimulation off  
461 vs. 20 Hz, neural biomarker:  $0.905\pm 0.095$  vs.  $0.545\pm 0.059$ ,  $P=0.04$ ; HAMD:  
462  $0.875\pm 0.125$  vs.  $0.375\pm 0.072$ ,  $P=0.05$ ; MADRS:  $0.875\pm 0.000$  vs.  $0.606\pm 0.061$ ,  
463  $P=0.08$ ). Specifically, the neural biomarker, HAMD and MADRS scores all

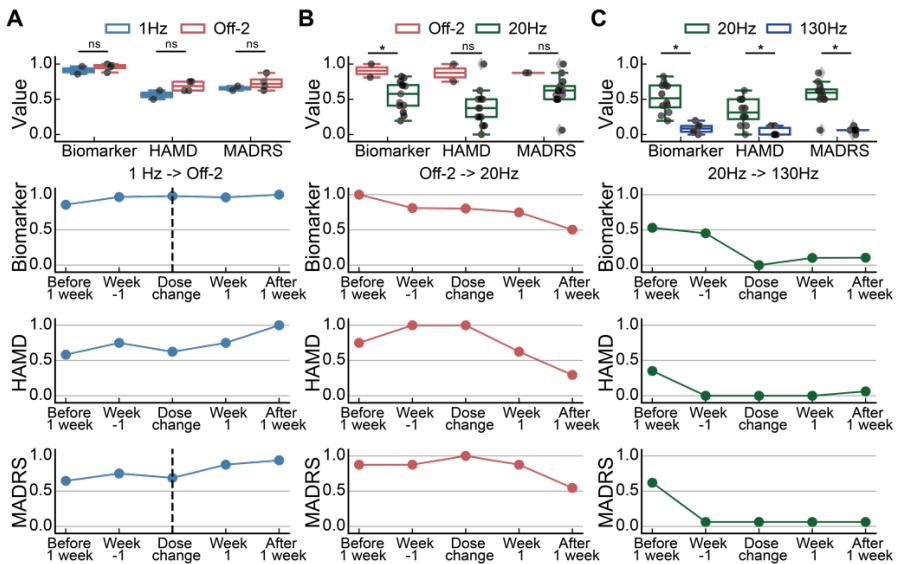

**Figure 8.** The consistent trend between the neural biomarker and the depression symptom changes when DBS frequencies were altered. (A) DBS frequency was altered from 1 Hz to Off-2. Top: comparison of the values of the biomarker, HAMD scores and MADRS scores between the 1Hz stage and Off-2 stage. Two-sided Wilcoxon rank-sum test was used for significance test. Asterisks indicate the significance  $*p < 0.05$  and ns indicates no significance. Row two: changes in the identified neural biomarker time-locked to the DBS frequency alteration week (vertical dashed line). Row three: changes in HAMD time-locked to the DBS frequency alteration week. Bottom: changes in MADRS time-locked to the DBS frequency alteration week. (B) same as (A) but for DBS frequency alteration from Off-2 to 20 Hz. (C) same as (A) but for DBS frequency alteration from 20 Hz to 130 Hz.

464 decreased at the week of DBS frequency alteration, further decreased one week after  
 465 the alteration and continued to decrease with more obvious changes after week two.  
 466 For the DBS alteration from 20 Hz to 130 Hz stimulation, the neural biomarker,  
 467 HAMD, and MADRS also consistently decreased (Figure 8C, 20 Hz vs. 130 Hz,  
 468 neural biomarker:  $0.524 \pm 0.060$  vs.  $0.088 \pm 0.029$ ,  $P = 0.001$ ; HAMD:  $0.323 \pm 0.054$  vs.  
 469  $0.042 \pm 0.026$ ,  $P = 0.004$ ; MADRS:  $0.573 \pm 0.056$  vs.  $0.062 \pm 0.016$ ,  $P = 0.001$ ). More  
 470 specifically, the neural biomarker, HAMD and MADRS scores already showed a  
 471 trend of decreasing before the DBS frequency alteration, and the alleviated symptoms  
 472 stayed relatively stable during the alteration week, at week one after the alteration,

473 and the same stable trend continued after week two. The results suggested that the 1  
474 Hz DBS did not induce an obvious change in depression symptoms, while the 20 Hz  
475 and 130 Hz DBS had more meaningful effects. The results further showed that the  
476 neural biomarker indeed reflected the different change patterns in depression  
477 symptoms when the DBS frequencies were altered.

### 478 **3.6 Neural biomarker identification and testing was robust to** 479 **adequate decreasing of data sample size**

480 The neural biomarker was identified and tested by a dataset consisting of 122 days of  
481 data samples. Due to the difficulty of obtaining a large amount of longitudinal data,  
482 we investigated the robustness of neural biomarker identification and testing in terms  
483 of data sample size decreasing. We decreased the data sample size gradually from 122  
484 to 10 with a step size of 2, randomly removed data from neural biomarker  
485 identification and testing for each data sample size, and then repeated the entire neural  
486 biomarker classification and tracking analyses. We found that the neural biomarker  
487 classification accuracy consistently maintained above 0.95 even by decreasing the  
488 sample size to 70 but had a large decrease below a sample size of 40 (Figure 9A).  
489 Similarly, the neural biomarker tracking performance (EV in prediction) maintained  
490 relatively stable by decreasing the sample size to 70 but had much larger fluctuations  
491 below a sample size of 40 (Figure 9B). These results suggest that our data sample size  
492 of 122 days was sufficient to obtain a robust neural biomarker.

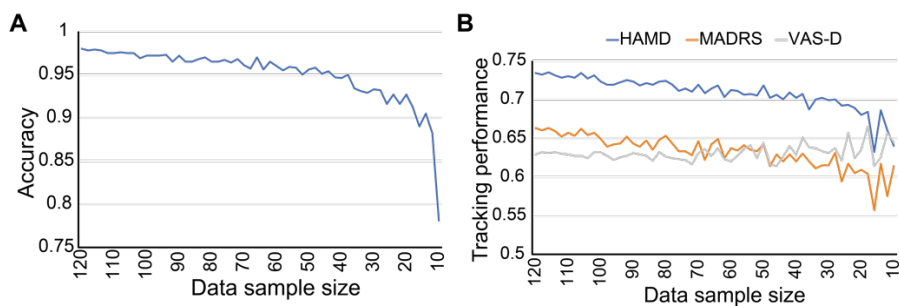

**Figure 9.** Changes of the neural biomarker identification and tracking performance by gradually decreasing the data sample size. (A) The accuracy of classifying the high and low symptom states. (B) The tracking performance of depression symptoms (weekly HAMD, weekly MADRS, and daily VAS-D).

493 **3.7 The identified neural biomarker was mainly contributed by**  
 494 **the  $\beta$  band spectral feature and the Hurst exponent temporal**  
 495 **feature**

496 Having demonstrated the usefulness and robustness of the identified neural biomarker,  
 497 we next aimed to provide neurobiological interpretations for the neural biomarker  
 498 from multiple aspects. We started by investigating the most contributing spectral and  
 499 temporal LFP features in the neural biomarker. We recognized the most contributing  
 500 spectral and temporal LFP features by separately classifying the high and low weekly  
 501 symptom states using each individual spectral and temporal LFP feature (Figure 10A).  
 502 The best temporal domain feature was the Hurst exponent, with a cross-validated  
 503 classification accuracy of 0.93. While the best spectral domain feature was the  $\beta$  band  
 504 PSD, with an average accuracy of 0.80. Overall, temporal domain features (average  
 505 accuracy: 0.78) outperformed spectral domain features (average accuracy: 0.71).  
 506 Notably, combining all the LFP features yielded superior performance compared to

507 individual features. Consistently, by investigating the logistic regression coefficients  
508 of the neural biomarker model (Figure 10B), we found that the features with better  
509 classification accuracy also had larger coefficients in the neural biomarker model,  
510 again showing the importance of  $\beta$  band PSD and Hurst exponent.

511 We then examined the variations of  $\beta$  band PSD and Hurst exponent at the high,  
512 transition and low symptom states. In terms of the spectral domain, the overall LFP  
513 PSD showed obvious changes during the three symptom states (Figure 10C), with the  
514  $\beta$  band PSD showing a significant and consistent decrease when changing from high  
515 state, to transition state, and finally to low state (Figure 10D). By contrast, no  
516 significant change was found for the  $\theta$  band PSD and less consistent changes was  
517 found for the  $\delta$  band and  $\alpha$  band PSD (Figure 10D). In terms of the temporal domain,  
518 the Hurst exponent showed an increase when changing from high state, to transition  
519 state, and finally to low state (Figure 10E and 10F) while other representative  
520 temporal domain features showed less obvious changes (Figure 10F). Together, these  
521 results demonstrated the important contribution of the  $\beta$  band spectral feature and the  
522 Hurst exponent temporal feature to the identification of neural biomarker and the  
523 tracking of depression symptom state.

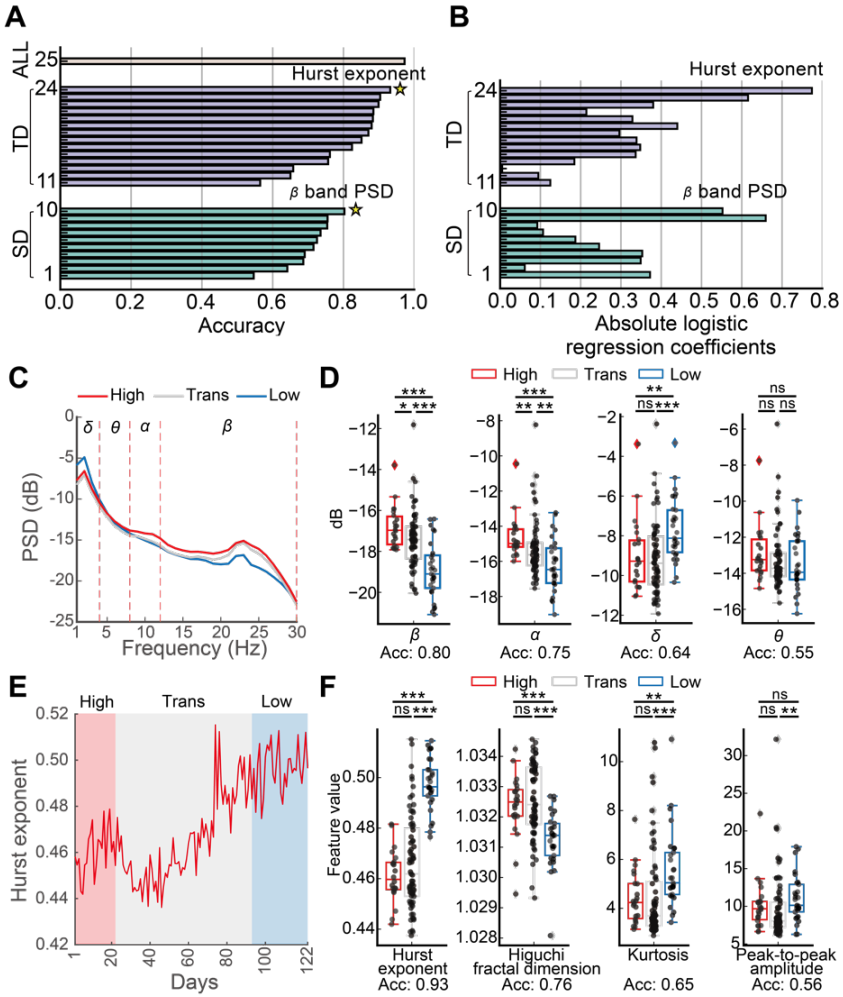

**Figure 10.** Importance of the  $\beta$  band spectral feature and the Hurst exponent temporal feature to the identification of neural biomarker and the tracking of the depression symptom state. (A) Classification accuracy of individual domain features and all LFP features by separately training LR models. The individual spectral domain (SD) features are in green, and their indices are ordered based on classification accuracy. The individual temporal domain (TD) features are in blue, and their indices are ordered by classification accuracy. The combination of all LFP features is in brown. The best individual feature was indicated by a yellow star for each domain. (B) The absolute coefficients of each feature in the LR model trained with all LFP features. The feature indices are the same as in (A). (C) Changes in the average LFP spectrum from the high symptom state (High) to the transition symptom state (Trans), and finally to the low symptom state (Low). (D) Changes in each of the four frequency bands with individual feature classification accuracy (Acc) indicated below. Two-sided Wilcoxon rank-sum test was used for significance test. Asterisks indicate the significance levels  $*p < 0.05$ ,  $**p < 0.01$ ,  $***p < 0.001$ , and ns indicates no significance. (E) Changes in the temporal domain feature Hurst exponent from High to Trans to Low state. (F) Same as (D) but for four example temporal domain features.

### 524 **3.8 The identified neural biomarker and its contributing features** 525 **indicated changes in LHb excitatory/inhibition (E/I) balance**

526 We then interpreted the identified neural biomarker by relating it to the E/I balance  
527 of LHb activity. We used the LHb LFP spectrum's  $1/f$  slope as a possible indicator of  
528 LHb E/I balance, where a larger absolute  $1/f$  slope indicates more inhibition (see  
529 Section 2.9). We found that after DBS treatment, the LHb activity changed to a more  
530 inhibitory state (Figure 11A). More specifically, the LHb E/I balance indicator  
531 increased when high symptom state changed to low symptom state (Figure 11B) and  
532 showed a trend of increase during the entire DBS treatment process (Figure 11C),  
533 consistently indicating an increase of inhibition. Moreover, we found a significant  
534 positive correlation between the identified neural biomarker and the LHb E/I balance  
535 indicator (Figure 11D, Spearman's  $\rho = 0.78$ ,  $P = 2.7 \times 10^{-6}$ ). Further, the most  
536 contributing Hurst exponent temporal feature and  $\beta$  band spectral feature both  
537 significantly correlated with the LHb E/I balance indicator (Figure 11D, Hurst  
538 exponent: Spearman's  $\rho = -0.80$ ,  $P = 1.9 \times 10^{-28}$ ;  $\beta$  band PSD: Spearman's  
539  $\rho = 0.20$ ,  $P = 2.8 \times 10^{-2}$ ). These results suggest that LHb E/I balance changed  
540 towards more inhibition following DBS treatment and our identified neural biomarker  
541 and its most contributing features significantly tracked such a change in LHb E/I  
542 balance.



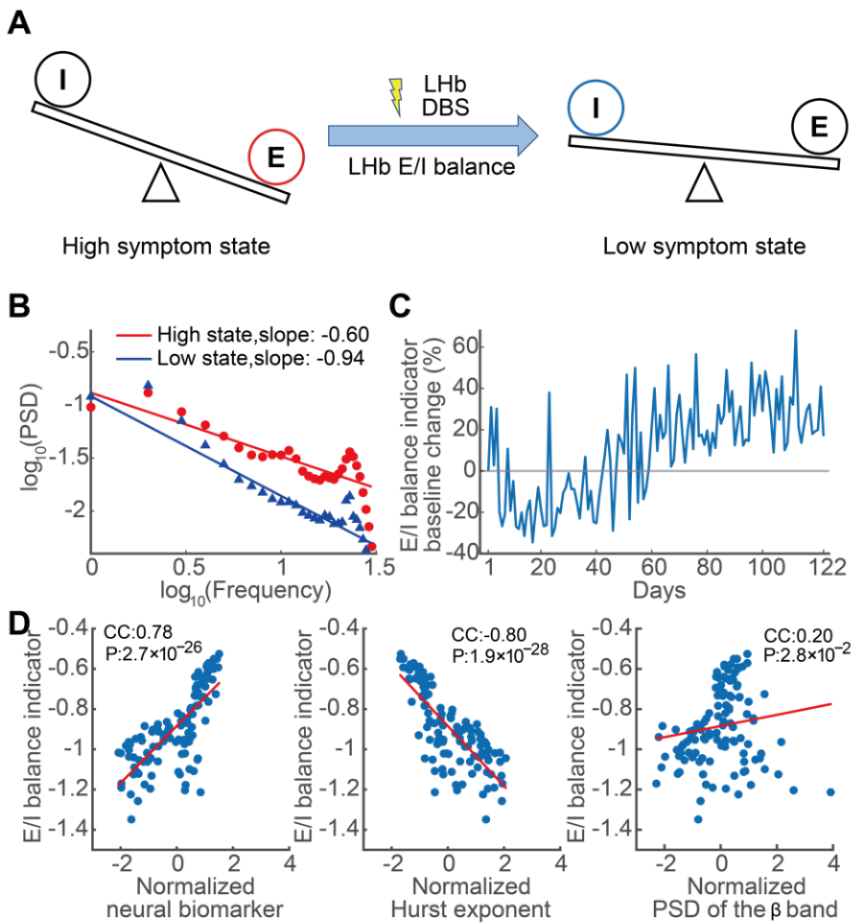

**Figure 11.** Changes of E/I balance during Lhb DBS treatment and its' correlations with the identified neural biomarker and the most contributing features. (A) Overview of the Lhb E/I balance change after DBS treatment. (B) Lhb LFP spectrum's  $1/f$  slope of two example days in high symptom state and low symptom state, respectively. The LFP spectrum's  $1/f$  slope is taken as the E/I balance indicator. (C) Temporal trace of baseline-normalized daily Lhb E/I balance indicator. (D) Correlation between the E/I balance indicator and the identified neural biomarker (left), between the E/I balance indicator and the Hurst exponent (middle), and the E/I balance indicator and the  $\beta$  band PSD (right).

544 **3.9 The DBS treatment involved a critical LHb-DRN circuit that**  
545 **possibly regulates depression via E/I balancing**

546 After finding a connection between the neural biomarker and LHb E/I balance, we  
547 finally investigated the underlying neural circuits of LHb E/I balance. We used  
548 diffusion tensor imaging to obtain white matter fibers related to LHb and found that  
549 strong white matter fiber connections exist between LHb and the dorsal raphe nucleus  
550 (DRN) in our patient (Figure 12A).

551 The LHb-DRN circuit is a critical pathway involved in central serotonergic  
552 regulation. This circuit plays a role in regulating cognition and reward, both of which  
553 are essential symptom dimensions associated with depression. The involvement of  
554 the LHb-DRN circuit suggests a possible mechanism of DBS treatment in our patient  
555 (also see Section 4.3). Specifically, prior studies have shown that in depressed  
556 patients, the LHb activity is overly excited (unbalanced E/I towards excitation), thus  
557 exerting substantial inhibition on the DRN via the inhibitory connections between  
558 LHb and DRN, consequently leading to reduced serotonin output from the DRN.  
559 Such a reduction in serotonin further inhibits the hippocampus and medial prefrontal  
560 cortex activity, possibly asserting influence on the cognitive dimension of depression;  
561 it also inhibits the nucleus accumbens activity, possibly asserting influence on the  
562 reward dimension of depression (Figure 12B). Our results suggest that LHb DBS  
563 treatment moved the LHb activity to a more inhibitory state, possibly restoring the  
564 LHb E/I balance towards a normal state and improving the depression symptoms  
565 (especially cognition functions and emotion blunting, see Section 3.1) via the critical  
566 regulation pathway involving LHb and DRN.

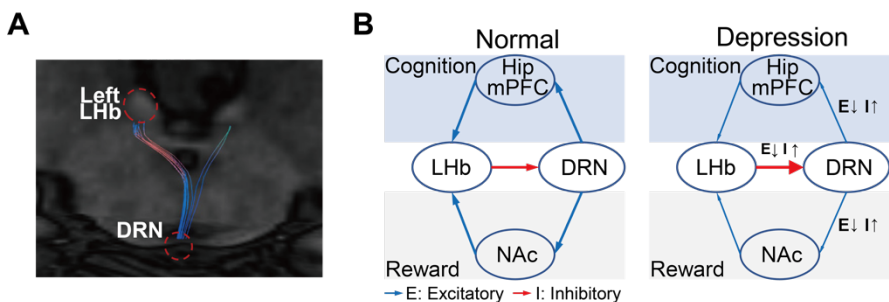

**Figure 12.** Diffusion tensor imaging of the white matter tracks related to LHB and a possible regulation pathway for depression. (A) Diffusion tensor imaging of the white matter tracks related to LHB. The DBS target (left LHB) and the connected brain area (DRN) were circled in red. Note that while the right LHB was not stimulated, its related white matter fibers are also shown. (B) LHB-DRN circuit and its possible role in regulating the cognition and reward dimensions of depression symptom. Hip: hippocampus; mPFC: medial prefrontal cortex; NAc: nucleus accumbens.

567 **4. Discussion**

568 **4.1 Improvement of depression symptoms, emotional blunting,**  
 569 **and cognitive function during DBS treatment**

570 The clinical evaluation results show that our patient not only achieved improvements  
 571 of HAMD, MADRS, and HAMA ratings that are typically used as clinical gold  
 572 standard in prior DBS studies [11,13,17], but also achieved notable improvements of  
 573 emotional blunting and cognition functioning. Almost three-quarters of patients in the  
 574 acute phase of depression and one-quarter of those in remission reported severe  
 575 emotional blunting. Approximately 56% of patients considered their emotional  
 576 blunting to be caused by their depression, while 45% believed that their  
 577 antidepressant medication was negatively affecting their emotions [63]. Emotional  
 578 blunting has a substantial negative impact on patients' daily functioning, well-being,  
 579 and quality of life in both the acute and remission phases of depression [64]. On the

580 other hand, cognitive deficits may be inherent to TRD and occur independently of  
581 affective symptomatology [65]. Objective cognitive assessment for the clinical  
582 evaluation for patients with TRD is important [66]. Thus, in our TRD patient, we  
583 specifically addressed the evaluation of both emotional blunting and cognitive  
584 functioning and showed improvements along both aspects.

585 However, our results regarding emotional blunting and cognitive functioning  
586 should be interpreted cautiously because of the lack of controlled data. Due to limited  
587 data about cognition in this case, we did not identify a neural biomarker to classify  
588 these cognitive states. The cognitive impact of DBS has usually been previously  
589 evaluated for epilepsy, movement disorder, and obsessive-compulsive disorder  
590 patients but rarely in controlled studies on TRD. Our study found no cognitive decline  
591 and suggests positive effects of DBS on cognitive functioning in TRD consistent with  
592 a previous report [67].

## 593 **4.2 A data-driven Lhb neural biomarker for tracking slow and** 594 **fast depression symptom variations during DBS treatment**

595 A mechanism-driven neural biomarker for depression is currently lacking mainly  
596 because the neural circuitry underlying depression has not been clearly delineated  
597 [68]. Therefore, current neural biomarkers of depression symptoms for tracking DBS  
598 effects have largely used data-driven machine learning methods to map LFP features  
599 to depression symptom ratings [17,32,33]. The usefulness of data-driven neural  
600 biomarkers critically depends on the type of data used to identify the neural biomarker.  
601 For example, a recent work [32] focused on a cingulate neural biomarker that was  
602 trained with and accordingly predicted longer-term (on the time scale of weeks)

503 clinical ratings. On the other hand, another recent work [17] only trained and tested a  
504 neural biomarker with shorter-term (on the time scale of minutes) self-reports. Our  
505 work is unique in that, while we identified our LHb neural biomarker based on weekly  
506 clinical ratings, we demonstrated that the neural biomarker predicted not only weekly  
507 clinical ratings (data not used in identification) but also daily self-reports (data again  
508 not used in identification). The results suggest that our LHb neural biomarker could  
509 track the temporal dynamics of both slow and fast depression symptom variations,  
510 which was useful for developing new aDBS strategies that are robust across different  
511 time scales. It is worth noting that our LHb neural biomarker specifically tracked the  
512 temporal dynamics of weekly and daily depression symptom scores but not the  
513 anxiety symptom scores. It suggests that despite the overlapping of depression-related  
514 and anxiety-related brain networks [69], LHb neural activity is mainly related to  
515 depression, which is supported by prior animal studies [21–23].

516 Both population-level and personalized neural biomarkers of depression  
517 symptoms have been identified for tracking DBS effects. Population-level neural  
518 biomarkers are derived from data collected from several patients and have the benefits  
519 of being directly applicable to a new patient and robust interpretability of the neural  
520 biomarker's biophysical mechanism across patients [32]. By contrast, personalized  
521 neural biomarkers are derived from data collected from an individual patient, which  
522 is more powerful in capturing the unique characteristics of depression symptoms in  
523 each patient, especially given the large inter-individual variability in depression-  
524 related brain networks [70]. With the emerging capability of recording more data  
525 within a single patient using mobile devices, personalized neural biomarker models  
526 can be more accurate in tracking the temporal dynamics of depression symptom

527 variations. With such trends, a personalized neural biomarker has been identified and  
528 used for realizing aDBS targeting VC/VS [17]. Our study identified a personalized  
529 neural biomarker that achieved accurate classification and tracking of depression  
530 symptom variations during the DBS treatment targeting LHB, confirming the  
531 usefulness of personalization. Nevertheless, population-level and personalized neural  
532 biomarkers can complement each other. For example, one can leverage a large amount  
533 of population data to train an interpretable population-level neural biomarker model,  
534 followed by fine-tuning with personalized data to further improve its accuracy, which  
535 is an important future research direction.

536 A critical issue in identifying data-driven neural biomarker, especially  
537 personalized neural biomarker, is the collection of sufficient amounts of data. A recent  
538 population-level study collected LFP and clinical rating data from 5 individuals on a  
539 weekly basis over a span of 24 weeks [32], resulting in a total data sample size of 120,  
540 which was deemed sufficient for obtaining a neural biomarker at the population level.  
541 Several personalized studies collected LFP or iEEG and self-report data over several  
542 days, with a data sample size of around 30 for each individual [17,33]. By contrast,  
543 our study involved daily data collection over a much longer period of 41 weeks. Even  
544 after removing noisy data epochs, our data-driven neural biomarker analyses were  
545 based on a substantial data sample size of 122 days, which significantly exceeded the  
546 data sample size of one individual in the aforementioned studies. Our robustness  
547 analyses confirmed the sufficiency of our data sample size, showing that in our patient,  
548 the neural biomarker performance maintained stable even after reducing the data  
549 sample size to around 70 but had significant variations after reducing the data sample  
550 size below 40. This result indicates the importance of collecting sufficient data for

551 identifying personalized neural biomarkers. The ongoing advancements in data  
552 recording devices offer exciting prospects for recording more data samples within an  
553 individual, thus facilitating the future development of personalized neural biomarkers.

### 554 **4.3 Neurobiological interpretation of the identified neural** 555 **biomarker and its contributing features in terms of LHb E/I** 556 **balance**

557 Previous studies have exclusively used LFP spectral domain features to identify  
558 neural biomarkers for depression [17,32,33]. By contrast, we found that both the LFP  
559 temporal domain and spectral domain features contributed to our neural biomarker  
560 and that the temporal domain features contributed relatively more than the spectral  
561 domain features. The main contributing temporal domain feature was the Hurst  
562 exponent. The Hurst exponent mainly indicates the stochasticity and predictability of  
563 a time-series [71]. We found that during the high and transition symptom states, the  
564 LHb LFP Hurst exponent values were mostly below 0.5, which indicated more  
565 stochastic and random-walk-like neural dynamics [72]. By contrast, during the low  
566 symptom state towards the end of DBS treatment, the LHb LFP Hurst exponent values  
567 were approaching and even surpassing 0.5, which indicated more predictable and  
568 stable neural dynamics [73]. Stochastic vs. predictable neural dynamics have been  
569 reported to relate with E/I balance of neural firing [74]. Related to this explanation,  
570 Hurst exponent has been widely used to examine E/I balance of the neural circuits in  
571 other neuropsychiatric disorders such as autism [75,76]. Our results suggest that a  
572 DBS-induced increase in LHb inhibition led to an increase in the Hurst exponent,  
573 moving LHb activity to a more E/I balanced state.

574           The main contributing spectral domain feature was the  $\beta$  band PSD. The LHb  $\beta$   
575 band oscillation was also found to correlate with depression symptoms before DBS  
576 treatment in a previous study [28]. The  $\beta$  band oscillation might reflect the abnormal  
577 E/I balance of LHb neural ensembles underlying depression because it can depend on  
578 the firing patterns of a network of inhibitory interneurons gated by their mutually  
579 induced GABA<sub>A</sub> action [77]. Moreover, LHb  $\beta$  band oscillation might be related to  
580 the abnormal burst spiking phenomena of LHb neurons found in rodents exhibiting  
581 depression-like behaviors [21–23]. These findings highlight the significance of the  $\beta$   
582 band oscillations in LHb as related to depression.

583           Existing neuroscience findings provide evidence that LHb E/I balance  
584 influences the dopaminergic and serotonergic projections from LHb and directly  
585 affects two neural pathways: the LHb-VTA (ventral tegmental area) pathway mainly  
586 regulates the dopaminergic activity, while the LHb-DRN pathway primarily regulates  
587 the serotonergic activity [34]. Our white fiber tracking results predominantly  
588 reflected the influence of DBS on the LHb-DRN pathway. The DBS might have  
589 inhibited overly-excited LHb activity, activating overly-inhibited DRN activity, and  
590 restoring downstream neural activity related to cognition and reward circuits related  
591 to depression, which finally led to the multi-faceted improvement of depression  
592 symptoms, emotional blunting, and cognitive functioning of our patient. However,  
593 due to the complexity of LHb-related circuits, the exact neural activity changes of the  
594 LHb-related circuit in DBS treatment of depression requires further investigation by  
595 collecting multimodal neural data from more brain regions.

596           It is worth noting that due to the limitation of DBS electrode, we only used a  
597 simple LFP  $1/f$  slope as an indirect indicator for LHb E/I balance. The E/I balance is



598 directly related to the spiking activity of excitatory neurons and inhibitory neurons,  
599 and further related to the neuronal homeostasis and the formation of neural  
700 oscillations [78,79]. The underlying excitatory and inhibitory neuron synaptic  
701 currents mix together to give rise to the  $1/f$ -like nature of the LFP PSD [34]. Previous  
702 study found that alterations of E/I balance within neural circuits can indeed be inferred  
703 from changes in the LFP  $1/f$  slope [80]. Nevertheless, the LFP signal represents the  
704 collective activity of multiple neurons and only provides an indirect measure of E/I  
705 balance. Future work can use more advanced micro-macro electrodes [81] to record  
706 LHb spiking activity to more directly quantify LHb E/I balance.

#### 707 **4.4 DBS frequency differentially modulates the depression** 708 **symptom and neural biomarker**

709 Prior studies have shown that DBS frequency can significantly influence the treatment  
710 efficacy for TRD, e.g., high-frequency DBS has generally yielded better treatment  
711 outcomes than low-frequency DBS [24,82,83]. Consistently, we discovered that a  
712 very low DBS frequency of 1 Hz was not effective in alleviating the depression  
713 symptoms in our patient, but higher frequencies of 20 Hz and 130 Hz were more  
714 effective. Beyond the depression symptom ratings, we additionally found that the  
715 neural biomarker was also consistently modulated by the different DBS frequencies.  
716 DBS frequency might influence the release of neurotransmitters in depression-  
717 targeted pathways [84], thus modulating the neural biomarker and the depression  
718 symptoms. However, similar to other DBS targets, the optimal DBS frequency at LHb  
719 is still also an open question that requires further research.

## 720 **5. Limitations**

721 Our study has several limitations. First, while our study had a sufficient within-patient  
722 data sample size, the patient sample size was limited (n-of-1); further studies with  
723 more patients are needed to confirm our findings on LHb neural biomarkers. Second,  
724 despite its powerful classification and tracking performance, our neural biomarker  
725 was identified using only one channel of LFP signals due to the limitation of device  
726 hardware configuration. Incorporating multi-channel LFP signals in future studies  
727 would allow for finding neural biomarkers with even better performance and a more  
728 comprehensive understanding of the neural mechanism underlying neural biomarker  
729 identification. Third, due to the high-frequency recording noise of our DBS device,  
730 we filtered the LFP signal below 30 Hz to ensure noise rejection. Future work with  
731 better recording capability should investigate how higher-frequency LFP temporal  
732 and spectral domain features contribute to the identification of neural biomarkers.  
733 Finally, to remove the confounding factor of stimulation artifact, when we recorded  
734 LFP, we completely turned off stimulation. While this approach ensured stimulation-  
735 artifact-free LFP signals, it is important to consider using LFP signals during  
736 stimulation to identify better responsive neural biomarkers in the future, but this  
737 requires high-performance stimulation artifact removal, which remains challenging  
738 [85].

## 739 **6. Conclusion**

740 One patient with TRD reached remission after 41 weeks of LHb DBS treatment. With  
741 a unique longitudinal data collection of concurrent daily and weekly depression

742 symptom scores and LHb LFP signals during the entire treatment process, we used  
743 machine learning to identify an LHb neural biomarker of depression symptoms, with  
744 the most contributing spectral feature being LFP  $\beta$  band power and temporal feature  
745 being Hurst exponent. We demonstrated that our LHb neural biomarker accurately  
746 classified high and low depression symptom severity states, simultaneously tracked  
747 the temporal dynamics of weekly (slow) and daily (fast) depression symptom  
748 variations during the DBS treatment process, and reflected the depression symptom  
749 changes in response to DBS frequency alterations. We also interpreted the neural  
750 biomarker as indicating changes in LHb excitatory/inhibition balance during DBS  
751 treatment. Our methods and results hold promise in identifying clinically-viable  
752 neural biomarkers to facilitate future adaptive DBS developments for treating TRD.

## 753 **Data availability**

754 The data supporting this study's findings are available from the corresponding author  
755 upon reasonable request.

## 756 **Funding**

757 This work was supported in part by the National Natural Science Foundation of China  
758 under Grants 62336007, 62306269 and 62476239, in part by the Zhejiang Provincial  
759 Natural Science Foundation of China under Grant LD24H090001, in part by the  
760 Starry Night Science Fund of Zhejiang University Shanghai Institute for Advanced  
761 Study under Grant SN-ZJU-SIAS-002, and in part by the Fundamental Research  
762 Funds for the Central Universities under Grant 226-2024-00127.

## 763 **Author Contributions**

764 Shi Liu: Methodology, Software, Formal analysis, Writing - Original Draft,  
765 Visualization. Yu Qi: Investigation, Resources. Shaohua Hu: Conceptualization,  
766 Resources. Ning Wei: Resources, Data Curation, Writing - Original Draft. Jianmin  
767 Zhang: Conceptualization, Resources. Junming Zhu: Conceptualization, Resources.  
768 Hemmings Wu: Conceptualization, Investigation. Hailan Hu: Conceptualization.  
769 Yuxiao Yang: Conceptualization, Supervision, Methodology, Writing - Review &  
770 Editing, Funding acquisition. Yueming Wang: Conceptualization, Supervision,  
771 Project administration, Funding acquisition, Writing - Review & Editing. All authors  
772 revised and approved the final version of the manuscript.

## 773 **Conflict of Interest**

774 There are no financial conflicts of interest to disclose.

## 775 **References**

- 776 [1] Organization WH, others. Depression and other common mental disorders:  
777 global health estimates. World Health Organization; 2017.
- 778 [2] Otte C, Gold SM, Penninx BW, Pariante CM, Etkin A, Fava M, et al. Major  
779 depressive disorder. *Nat Rev Dis Primers* 2016;2:16065.  
780 <https://doi.org/10.1038/nrdp.2016.65>.
- 781 [3] Krauss JK, Lipsman N, Aziz T, Boutet A, Brown P, Chang JW, et al.  
782 Technology of deep brain stimulation: current status and future directions. *Nat*  
783 *Rev Neurol* 2021;17:75–87. <https://doi.org/10.1038/s41582-020-00426-z>.
- 784 [4] Dandekar MP, Fenoy AJ, Carvalho AF, Soares JC, Quevedo J. Deep brain  
785 stimulation for treatment-resistant depression: an integrative review of  
786 preclinical and clinical findings and translational implications. *Mol Psychiatry*  
787 2018;23:1094–112. <https://doi.org/10.1038/mp.2018.2>.

- 788 [5] Figeé M, Riva-Posse P, Choi KS, Bederson L, Mayberg HS, Kopell BH. Deep  
789 Brain Stimulation for Depression. *Neurotherapeutics* 2022;19:1229–45.  
790 <https://doi.org/10.1007/s13311-022-01270-3>.
- 791 [6] Johnson KA, Okun MS, Scangos KW, Mayberg HS, de Hemptinne C. Deep  
792 brain stimulation for refractory major depressive disorder: a comprehensive  
793 review. *Mol Psychiatry* 2024:1–13. [https://doi.org/10.1038/s41380-023-](https://doi.org/10.1038/s41380-023-02394-4)  
794 [02394-4](https://doi.org/10.1038/s41380-023-02394-4).
- 795 [7] Mayberg HS, Lozano AM, Voon V, McNeely HE, Seminowicz D, Hamani C,  
796 et al. Deep Brain Stimulation for Treatment-Resistant Depression. *Neuron*  
797 2005;45:651–60. <https://doi.org/10.1016/j.neuron.2005.02.014>.
- 798 [8] Malone DA, Dougherty DD, Rezai AR, Carpenter LL, Friehs GM, Eskandar  
799 EN, et al. Deep Brain Stimulation of the Ventral Capsule/Ventral Striatum for  
800 Treatment-Resistant Depression. *Biol Psychiatry* 2009;65:267–75.  
801 <https://doi.org/10.1016/j.biopsych.2008.08.029>.
- 802 [9] Schlaepfer TE, Bewernick BH, Kayser S, Mädler B, Coenen VA. Rapid Effects  
803 of Deep Brain Stimulation for Treatment-Resistant Major Depression. *Biol*  
804 *Psychiatry* 2013;73:1204–12. <https://doi.org/10.1016/j.biopsych.2013.01.034>.
- 805 [10] Neumann W-J, Huebl J, Brücke C, Gabriëls L, Bajbouj M, Merkl A, et al.  
806 Different patterns of local field potentials from limbic DBS targets in patients  
807 with major depressive and obsessive compulsive disorder. *Mol Psychiatry*  
808 2014;19:1186–92. <https://doi.org/10.1038/mp.2014.2>.
- 809 [11] Bergfeld IO, Mantione M, Hoogendoorn MLC, Ruhe HG, Notten P, van  
810 Laarhoven J, et al. Deep Brain Stimulation of the Ventral Anterior Limb of the  
811 Internal Capsule for Treatment-Resistant Depression A Randomized Clinical  
812 Trial. *Jama Psychiatry* 2016;73:456–64.  
813 <https://doi.org/10.1001/jamapsychiatry.2016.0152>.
- 814 [12] Dougherty DD, Rezai AR, Carpenter LL, Howland RH, Bhati MT, O’Reardon  
815 JP, et al. A Randomized Sham-Controlled Trial of Deep Brain Stimulation of  
816 the Ventral Capsule/Ventral Striatum for Chronic Treatment-Resistant  
817 Depression. *Biol Psychiatry* 2015;78:240–8.  
818 <https://doi.org/10.1016/j.biopsych.2014.11.023>.
- 819 [13] Holtzheimer PE, Husain MM, Lisanby SH, Taylor SF, Whitworth LA,  
820 McClintock S, et al. Subcallosal cingulate deep brain stimulation for treatment-  
821 resistant depression: a multisite, randomised, sham-controlled trial. *Lancet*  
822 *Psychiatry* 2017;4:839–49. [https://doi.org/10.1016/S2215-0366\(17\)30371-1](https://doi.org/10.1016/S2215-0366(17)30371-1).
- 823 [14] Coenen VA, Bewernick BH, Kayser S, Kilian H, Boström J, Greschus S, et al.  
824 Superolateral medial forebrain bundle deep brain stimulation in major  
825 depression: a gateway trial. *Neuropsychopharmacology* 2019;44:1224–32.  
826 <https://doi.org/10.1038/s41386-019-0369-9>.
- 827 [15] Raymaekers S, Luyten L, Bervoets C, Gabriëls L, Nuttin B. Deep brain  
828 stimulation for treatment-resistant major depressive disorder: a comparison of

329 two targets and long-term follow-up. *Transl Psychiatry* 2017;7:e1251–e1251.  
330 <https://doi.org/10.1038/tp.2017.66>.

331 [16] Guidetti M, Marceglia S, Loh A, Harmsen IE, Meoni S, Foffani G, et al.  
332 Clinical perspectives of adaptive deep brain stimulation. *Brain Stimul*  
333 2021;14:1238–47. <https://doi.org/10.1016/j.brs.2021.07.063>.

334 [17] Scangos KW, Khambhati AN, Daly PM, Makhoul GS, Sugrue LP, Zamanian  
335 H, et al. Closed-loop neuromodulation in an individual with treatment-resistant  
336 depression. *Nat Med* 2021;27:1696–700. [https://doi.org/10.1038/s41591-021-](https://doi.org/10.1038/s41591-021-01480-w)  
337 [01480-w](https://doi.org/10.1038/s41591-021-01480-w).

338 [18] Hu H, Cui Y, Yang Y. Circuits and functions of the lateral habenula in health  
339 and in disease. *Nat Rev Neurosci* 2020;21:277–95.  
340 <https://doi.org/10.1038/s41583-020-0292-4>.

341 [19] Roman E, Weininger J, Lim B, Roman M, Barry D, Tierney P, et al. Untangling  
342 the dorsal diencephalic conduction system: a review of structure and function  
343 of the stria medullaris, habenula and fasciculus retroflexus. *Brain Struct Funct*  
344 2020;225:1437–58. <https://doi.org/10.1007/s00429-020-02069-8>.

345 [20] Dai D, Li W, Chen A, Gao X-F, Xiong L. Lateral Habenula and Its Potential  
346 Roles in Pain and Related Behaviors. *ACS Chem Neurosci* 2022;13:1108–18.  
347 <https://doi.org/10.1021/acchemneuro.2c00067>.

348 [21] Cui Y, Yang Y, Dong Y, Hu H. Decoding Depression: Insights from Glial and  
349 Ketamine Regulation of Neuronal Burst Firing in Lateral Habenula. *Cold*  
350 *Spring Harb Symp Quant Biol* 2018;83:141–50.  
351 <https://doi.org/10.1101/sqb.2018.83.036871>.

352 [22] Cui Y, Yang Y, Ni Z, Dong Y, Cai G, Foncelle A, et al. Astroglial Kir4.1 in the  
353 lateral habenula drives neuronal bursts in depression. *Nature* 2018;554:323–7.  
354 <https://doi.org/10.1038/nature25752>.

355 [23] Yang Y, Cui Y, Sang K, Dong Y, Ni Z, Ma S, et al. Ketamine blocks bursting in  
356 the lateral habenula to rapidly relieve depression. *Nature* 2018;554:317–22.  
357 <https://doi.org/10.1038/nature25509>.

358 [24] Sartorius A, Kiening KL, Kirsch P, Gall CC von, Haberkorn U, Unterberg AW,  
359 et al. Remission of Major Depression Under Deep Brain Stimulation of the  
360 Lateral Habenula in a Therapy-Refractory Patient. *Biol Psychiatry* 2010;67:e9–  
361 11. <https://doi.org/10.1016/j.biopsych.2009.08.027>.

362 [25] Wang Z, Cai X, Qiu R, Yao C, Tian Y, Gong C, et al. Case Report: Lateral  
363 Habenula Deep Brain Stimulation for Treatment-Resistant Depression. *Front*  
364 *Psychiatry* 2021;11. <https://doi.org/10.3389/fpsy.2020.616501>.

365 [26] Kiening K, Sartorius A. A new translational target for deep brain stimulation to  
366 treat depression. *EMBO Molecular Medicine* 2013;5:1151–3.  
367 <https://doi.org/10.1002/emmm.201302947>.

368 [27] Zhang C, Kim S-G, Li D, Zhang Y, Li Y, Husch A, et al. Habenula deep brain  
369 stimulation for refractory bipolar disorder. *Brain Stimulation* 2019;12:1298–  
370 300. <https://doi.org/10.1016/j.brs.2019.05.010>.

- 371 [28] Zhang C, Zhang Y, Luo H, Xu X, Yuan T, Li D, et al. Bilateral Habenula deep  
372 brain stimulation for treatment-resistant depression: clinical findings and  
373 electrophysiological features. *Transl Psychiatry* 2022;12:52.  
374 <https://doi.org/10.1038/s41398-022-01818-z>.
- 375 [29] Wang Z, Jiang C, Guan L, Zhao L, Fan T, Wang J, et al. Deep brain stimulation  
376 of habenula reduces depressive symptoms and modulates brain activities in  
377 treatment-resistant depression. *Nat Mental Health* 2024.  
378 <https://doi.org/10.1038/s44220-024-00286-2>.
- 379 [30] Vissani M, Isaias IU, Mazzone A. Deep brain stimulation: a review of the open  
380 neural engineering challenges. *J Neural Eng* 2020;17:051002.  
381 <https://doi.org/10.1088/1741-2552/abb581>.
- 382 [31] Priori A, Maiorana N, Dini M, Guidetti M, Marceglia S, Ferrucci R. Chapter  
383 Six - Adaptive deep brain stimulation (aDBS). In: Moro E, Polosan M, Hamani  
384 C, editors. *Int Rev Neurobiol*, vol. 159, Academic Press; 2021, p. 111–27.  
385 <https://doi.org/10.1016/bs.irn.2021.06.006>.
- 386 [32] Alagapan S, Choi KS, Heisig S, Riva-Posse P, Crowell A, Tiruvadi V, et al.  
387 Cingulate dynamics track depression recovery with deep brain stimulation.  
388 *Nature* 2023;1–9. <https://doi.org/10.1038/s41586-023-06541-3>.
- 389 [33] Frank AC, Scangos KW, Larson PS, Norbu T, Lee AT, Lee AM. Identification  
390 of a personalized intracranial biomarker of depression and response to DBS  
391 therapy. *Brain Stimul* 2021;14:1002–4.  
392 <https://doi.org/10.1016/j.brs.2021.06.009>.
- 393 [34] Sonkusare S, Ding Q, Zhang Y, Wang L, Gong H, Mandali A, et al. Power  
394 signatures of habenular neuronal signals in patients with bipolar or unipolar  
395 depressive disorders correlate with their disease severity. *Transl Psychiatry*  
396 2022;12:1–9. <https://doi.org/10.1038/s41398-022-01830-3>.
- 397 [35] Cobb BS, Coryell WH, Cavanaugh J, Keller M, Solomon DA, Endicott J, et al.  
398 Seasonal variation of depressive symptoms in unipolar major depressive  
399 disorder. *Compr Psychiatry* 2014;55:1891–9.  
900 <https://doi.org/10.1016/j.comppsy.2014.07.021>.
- 901 [36] Panaite V, Rottenberg J, Bylsma LM. Daily Affective Dynamics Predict  
902 Depression Symptom Trajectories Among Adults with Major and Minor  
903 Depression. *Affect Sci* 2020;1:186–98. <https://doi.org/10.1007/s42761-020-00014-w>.
- 904 [37] Kennedy SH, Giacobbe P, Rizvi SJ, Placenza FM, Nishikawa Y, Mayberg HS,  
905 et al. Deep Brain Stimulation for Treatment-Resistant Depression: Follow-Up  
906 After 3 to 6 Years. *Am J Psychiatry* 2011;168:502–10.  
907 <https://doi.org/10.1176/appi.ajp.2010.10081187>.
- 908 [38] Bewernick BH, Kayser S, Sturm V, Schlaepfer TE. Long-Term Effects of  
909 Nucleus Accumbens Deep Brain Stimulation in Treatment-Resistant  
910 Depression: Evidence for Sustained Efficacy. *Neuropsychopharmacology*  
911 2012;37:1975–85. <https://doi.org/10.1038/npp.2012.44>.
- 912

- 913 [39] Crowell AL, Riva-Posse P, Holtzheimer PE, Garlow SJ, Kelley ME, Gross RE,  
914 et al. Long-Term Outcomes of Subcallosal Cingulate Deep Brain Stimulation  
915 for Treatment-Resistant Depression. *Am J Psychiatry* 2019;176:949–56.  
916 <https://doi.org/10.1176/appi.ajp.2019.18121427>.
- 917 [40] Peeters F, Berkhof J, Delespaul P, Rottenberg J, Nicolson NA. Diurnal mood  
918 variation in major depressive disorder. *Emotion* 2006;6:383–91.  
919 <https://doi.org/10.1037/1528-3542.6.3.383>.
- 920 [41] Wirz-Justice A. Diurnal variation of depressive symptoms. *Dialogues Clin*  
921 *Neurosci* 2008;10:337–43.  
922 <https://doi.org/10.31887/DCNS.2008.10.3/awjustice>.
- 923 [42] Scangos KW, Makhoul GS, Sugrue LP, Chang EF, Krystal AD. State-dependent  
924 responses to intracranial brain stimulation in a patient with depression. *Nat*  
925 *Med* 2021;27:229–31. <https://doi.org/10.1038/s41591-020-01175-8>.
- 926 [43] Bewernick BH, Kayser S, Gippert SM, Coenen VA, Schlaepfer TE. Acute  
927 antidepressant effects of deep brain stimulation – Review and data from  
928 sIMFB-stimulation. *Pers Med Psychiatry* 2017;3:1–7.  
929 <https://doi.org/10.1016/j.pmip.2017.01.002>.
- 930 [44] Xiao J, Provenza NR, Asfour J, Myers J, Mathura RK, Metzger B, et al.  
931 Decoding Depression Severity From Intracranial Neural Activity. *Biol*  
932 *Psychiatry* 2023;94:445–53. <https://doi.org/10.1016/j.biopsych.2023.01.020>.
- 933 [45] Sani OG, Yang Y, Lee MB, Dawes HE, Chang EF, Shanechi MM. Mood  
934 variations decoded from multi-site intracranial human brain activity. *Nat*  
935 *Biotechnol* 2018;36:954–61. <https://doi.org/10.1038/nbt.4200>.
- 936 [46] Kirkby LA, Luongo FJ, Lee MB, Nahum M, Vleet TMV, Rao VR, et al. An  
937 Amygdala-Hippocampus Subnetwork that Encodes Variation in Human Mood.  
938 *Cell* 2018;175:1688-1700.e14. <https://doi.org/10.1016/j.cell.2018.10.005>.
- 939 [47] Ashkan K, Rogers P, Bergman H, Ughratdar I. Insights into the mechanisms of  
940 deep brain stimulation. *Nat Rev Neurol* 2017;13:548–54.  
941 <https://doi.org/10.1038/nrneurol.2017.105>.
- 942 [48] Ramasubbu R, Lang S, Kiss ZHT. Dosing of Electrical Parameters in Deep  
943 Brain Stimulation (DBS) for Intractable Depression: A Review of Clinical  
944 Studies. *Front Psychiatry* 2018;9. <https://doi.org/10.3389/fpsy.2018.00302>.
- 945 [49] Okun M, Lampl I. Balance of excitation and inhibition. *Scholarpedia*  
946 2009;4:7467. <https://doi.org/10.4249/scholarpedia.7467>.
- 947 [50] Hu H, Cui Y, Yang Y. Circuits and functions of the lateral habenula in health  
948 and in disease. *Nat Rev Neurosci* 2020;21:277–95.  
949 <https://doi.org/10.1038/s41583-020-0292-4>.
- 950 [51] Balcita-Pedicino JJ, Omelchenko N, Bell R, Sesack SR. The inhibitory  
951 influence of the lateral habenula on midbrain dopamine cells: Ultrastructural  
952 evidence for indirect mediation via the rostromedial mesopontine tegmental  
953 nucleus. *Journal of Comparative Neurology* 2011;519:1143–64.  
954 <https://doi.org/10.1002/cne.22561>.



- 955 [52] Sun Y, Cao J, Xu C, Liu X, Wang Z, Zhao H. Rostromedial tegmental nucleus-  
956 substantia nigra pars compacta circuit mediates aversive and despair behavior  
957 in mice. *Experimental Neurology* 2020;333:113433.  
958 <https://doi.org/10.1016/j.expneurol.2020.113433>.
- 959 [53] Zhu Z, Hubbard E, Guo X, Barbosa DAN, Popal AM, Cai C, et al. A  
960 connectomic analysis of deep brain stimulation for treatment-resistant  
961 depression. *Brain Stimul* 2021;14:1226–33.  
962 <https://doi.org/10.1016/j.brs.2021.08.010>.
- 963 [54] Yeung AWK, Wong NSM. The Historical Roots of Visual Analog Scale in  
964 Psychology as Revealed by Reference Publication Year Spectroscopy. *Front*  
965 *Hum Neurosci* 2019;13. <https://doi.org/10.3389/fnhum.2019.00086>.
- 966 [55] Schiratti J-B, Le Douget J-E, Le van Quyen M, Essid S, Gramfort A. An  
967 ensemble learning approach to detect epileptic seizures from long intracranial  
968 EEG recordings. ICASSP 2018 - 2018 IEEE International Conference on  
969 Acoustics, Speech and Signal Processing (ICASSP, Calgary, Canada: IEEE;  
970 2018. <https://doi.org/10.1109/ICASSP.2018.8461489>.
- 971 [56] Banville H, Wood SUN, Aimone C, Engemann D-A, Gramfort A. Robust  
972 learning from corrupted EEG with dynamic spatial filtering. *NeuroImage*  
973 2022;251:118994. <https://doi.org/10.1016/j.neuroimage.2022.118994>.
- 974 [57] Engemann DA, Mellot A, Höchenberger R, Banville H, Sabbagh D, Gemein L,  
975 et al. A reusable benchmark of brain-age prediction from M/EEG resting-state  
976 signals. *NeuroImage* 2022;262:119521.  
977 <https://doi.org/10.1016/j.neuroimage.2022.119521>.
- 978 [58] Giorgino T. Computing and Visualizing Dynamic Time Warping Alignments in  
979 R: The dtw Package. *J Stat Softw* 2009;31:1–24.  
980 <https://doi.org/10.18637/jss.v031.i07>.
- 981 [59] Sakoe H, Chiba S. Dynamic programming algorithm optimization for spoken  
982 word recognition. *IEEE Trans Acoust Speech Signal Process* 1978;26:43–9.  
983 <https://doi.org/10.1109/TASSP.1978.1163055>.
- 984 [60] Veerakumar A, Tiruvadi V, Howell B, Waters AC, Crowell AL, Voytek B, et al.  
985 Field potential 1/f activity in the subcallosal cingulate region as a candidate  
986 signal for monitoring deep brain stimulation for treatment-resistant depression.  
987 *J Neurophysiol* 2019;122:1023–35. <https://doi.org/10.1152/jn.00875.2018>.
- 988 [61] Arbutnott K, Frank J. Trail Making Test, Part B as a Measure of Executive  
989 Control: Validation Using a Set-Switching Paradigm. *J Clin Exp Neuropsychol*  
990 2000;22:518–28. [https://doi.org/10.1076/1380-3395\(200008\)22:4;1-0;FT518](https://doi.org/10.1076/1380-3395(200008)22:4;1-0;FT518).
- 991 [62] Salthouse TA. What Do Adult Age Differences in the Digit Symbol Substitution  
992 Test Reflect? *J Gerontol* 1992;47:P121–8.  
993 <https://doi.org/10.1093/geronj/47.3.P121>.
- 994 [63] Christensen MC, Ren H, Fagiolini A. Emotional blunting in patients with  
995 depression. Part I: clinical characteristics. *Ann Gen Psychiatry* 2022;21:10.  
996 <https://doi.org/10.1186/s12991-022-00387-1>.

- 997 [64] Christensen MC, Ren H, Fagiolini A. Emotional blunting in patients with  
998 depression. Part II: relationship with functioning, well-being, and quality of life.  
999 *Ann Gen Psychiatry* 2022;21:20. <https://doi.org/10.1186/s12991-022-00392-4>.
- 000 [65] Gonda X, Pompili M, Serafini G, Carvalho AF, Rihmer Z, Dome P. The role of  
001 cognitive dysfunction in the symptoms and remission from depression. *Ann*  
002 *Gen Psychiatry* 2015;14:27. <https://doi.org/10.1186/s12991-015-0068-9>.
- 003 [66] Bortolato B, Miskowiak KW, Köhler CA, Maes M, Fernandes BS, Berk M, et  
004 al. Cognitive remission: a novel objective for the treatment of major depression?  
005 *BMC Med* 2016;14:9. <https://doi.org/10.1186/s12916-016-0560-3>.
- 006 [67] Runia N, Mol GJJ, Hillenius T, Hassanzadeh Z, Denys D a. JP, Bergfeld IO.  
007 Effects of deep brain stimulation on cognitive functioning in treatment-resistant  
008 depression: a systematic review and meta-analysis. *Mol Psychiatry*  
009 2023;28:4585–93. <https://doi.org/10.1038/s41380-023-02262-1>.
- 010 [68] Knowland D, Lim BK. Circuit-based frameworks of depressive behaviors: The  
011 role of reward circuitry and beyond. *Pharmacol Biochem Behav* 2018;174:42–  
012 52. <https://doi.org/10.1016/j.pbb.2017.12.010>.
- 013 [69] Kalin NH. The Critical Relationship Between Anxiety and Depression. *Am J*  
014 *Psychiatry* 2020;177:365–7. <https://doi.org/10.1176/appi.ajp.2020.20030305>.
- 015 [70] Sampogna G, Toni C, Catapano P, Rocca BD, Di Vincenzo M, Luciano M, et  
016 al. New trends in personalized treatment of depression. *Curr Opin Psychiatry*  
017 2024;37:3. <https://doi.org/10.1097/YCO.0000000000000903>.
- 018 [71] Carbone A, Castelli G, Stanley HE. Time-dependent Hurst exponent in  
019 financial time series. *Physica A: Statistical Mechanics and Its Applications*  
020 2004;344:267–71. <https://doi.org/10.1016/j.physa.2004.06.130>.
- 021 [72] Kale M, Butar Butar F. Fractal analysis of time series and distribution  
022 properties of Hurst exponent. *J Math Sci Math Educ* 2011;5:8–19.
- 023 [73] Díaz M. HA, Córdova F. On the meaning of Hurst entropy applied to EEG data  
024 series. *Procedia Computer Science* 2022;199:1385–92.  
025 <https://doi.org/10.1016/j.procs.2022.01.175>.
- 026 [74] Latham PE, Richmond BJ, Nelson PG, Nirenberg S. Intrinsic Dynamics in  
027 Neuronal Networks. I. Theory. *Journal of Neurophysiology* 2000;83:808–27.  
028 <https://doi.org/10.1152/jn.2000.83.2.808>.
- 029 [75] Pretzsch CM, Floris DL. Balancing excitation and inhibition in the autistic  
030 brain. *eLife* 2020;9:e60584. <https://doi.org/10.7554/eLife.60584>.
- 031 [76] Trakoshis S, Martínez-Cañada P, Rocchi F, Canella C, You W, Chakrabarti B,  
032 et al. Intrinsic excitation-inhibition imbalance affects medial prefrontal cortex  
033 differently in autistic men versus women. *eLife* 2020;9:e55684.  
034 <https://doi.org/10.7554/eLife.55684>.
- 035 [77] Porjesz B, Almasy L, Edenberg HJ, Wang K, Chorlian DB, Foroud T, et al.  
036 Linkage disequilibrium between the beta frequency of the human EEG and a  
037 GABAA receptor gene locus. *Proceedings of the National Academy of*  
038 *Sciences* 2002;99:3729–33. <https://doi.org/10.1073/pnas.052716399>.

- 039 [78] Turrigiano GG, Nelson SB. Homeostatic plasticity in the developing nervous  
040 system. *Nat Rev Neurosci* 2004;5:97–107. <https://doi.org/10.1038/nrn1327>.
- 041 [79] Atallah BV, Scanziani M. Instantaneous Modulation of Gamma Oscillation  
042 Frequency by Balancing Excitation with Inhibition. *Neuron* 2009;62:566–77.  
043 <https://doi.org/10.1016/j.neuron.2009.04.027>.
- 044 [80] Gao R, Peterson EJ, Voytek B. Inferring synaptic excitation/inhibition balance  
045 from field potentials. *NeuroImage* 2017;158:70–8.  
046 <https://doi.org/10.1016/j.neuroimage.2017.06.078>.
- 047 [81] Daume J, Kamiński J, Schjetnan AGP, Salimpour Y, Khan U, Kyzar M, et al.  
048 Control of working memory by phase–amplitude coupling of human  
049 hippocampal neurons. *Nature* 2024;629:393–401.  
050 <https://doi.org/10.1038/s41586-024-07309-z>.
- 051 [82] Liu Y, Postupna N, Falkenberg J, Anderson ME. High frequency deep brain  
052 stimulation: What are the therapeutic mechanisms? *Neurosci Biobehav Rev*  
053 2008;32:343–51. <https://doi.org/10.1016/j.neubiorev.2006.10.007>.
- 054 [83] Sani S, Busnello J, Kochanski R, Cohen Y, Gibbons RD. High-frequency  
055 measurement of depressive severity in a patient treated for severe treatment-  
056 resistant depression with deep-brain stimulation. *Transl Psychiatry*  
057 2017;7:e1207–e1207. <https://doi.org/10.1038/tp.2017.145>.
- 058 [84] McIntyre CC, Anderson RW. Deep brain stimulation mechanisms: the control  
059 of network activity via neurochemistry modulation. *J Neurochem*  
060 2016;139:338–45. <https://doi.org/10.1111/jnc.13649>.
- 061 [85] Iturrate I, Pereira M, Millán J del R. Closed-loop electrical neurostimulation:  
062 Challenges and opportunities. *Curr Opin Biomed Eng* 2018;8:28–37.  
063 <https://doi.org/10.1016/j.cobme.2018.09.007>.
- 064
